# Supplementary material for: The Inhibiting Effects of High-Dose Biochar Application on Soil Microbial Metagenomics and Rice (Oryza sativa L.) Production
Source: Int J Mol Sci. 2023 Oct 10;24(20):15043. doi: 10.3390/ijms242015043 (PMC10606461; doi:10.3390/ijms242015043)
Supplement: Supplementary file 1 [file ijms-24-15043-s001.zip]

Archive with 7 entries (7 files):
- ijms-2644532-supplementary.pdf
- Supplementary Table S1.xlsx
- Supplementary Table S2.xlsx
- Supplementary Table S3.xlsx
- Supplementary Table S4.xlsx
- Supplementary Table S5.xlsx
- Supplementary Table S6.xlsx
