# Supplementary material for: The Inhibiting Effects of High-Dose Biochar Application on Soil Microbial Metagenomics and Rice (Oryza sativa L.) Production
Source: Int J Mol Sci. 2023 Oct 10;24(20):15043. doi: 10.3390/ijms242015043 (PMC10606461; doi:10.3390/ijms242015043)
Supplement: Supplementary file 1 [file ijms-24-15043-s001.zip › Supplementary Table S1.xlsx]

## Sheet: Sheet1
Supplementary Table S1. The quality control of sequencing samples.
Treatment	Total sequence number	Total base number	Average Length (bp)	Max length (bp)	Minimum length (bp)
CK	1075650	549810853	511	51834	300
PBC	1120855	597411485	533	36605	300
PSBC	974127	531544918	545	35813	300
