# Supplementary material for: The Inhibiting Effects of High-Dose Biochar Application on Soil Microbial Metagenomics and Rice (Oryza sativa L.) Production
Source: Int J Mol Sci. 2023 Oct 10;24(20):15043. doi: 10.3390/ijms242015043 (PMC10606461; doi:10.3390/ijms242015043)
Supplement: Supplementary file 1 [file ijms-24-15043-s001.zip › Supplementary Table S2.xlsx]

## Sheet: Sheet1
Supplementary Table S2. The total amount of microbial communities at different taxonomic levels
Treatment		Domain	Kingdom	Phylum	Class	Order	Family	Genus	Species
Bacteria	CK	1	1	153	245	420	816	3335	26764
	PBC	1	1	153	245	420	813	3316	26290
	PSBC	1	1	153	245	419	810	3320	26287
	Total	1	1	153	245	421	820	3398	28628
Fungi	CK	1	1	8	36	79	166	227	349
	PBC	1	1	8	32	80	166	219	326
	PSBC	1	1	7	29	72	147	197	295
	Total	1	1	8	36	87	192	272	424
Archaea	CK	1	1	23	41	64	96	218	1129
	PBC	1	1	23	41	65	97	223	1148
	PSBC	1	1	22	40	64	96	220	1142
	Total	1	1	23	41	66	99	231	1231
Total		5	12	224	425	839	1586	4735	31617
