# Supplementary material for: The Inhibiting Effects of High-Dose Biochar Application on Soil Microbial Metagenomics and Rice (Oryza sativa L.) Production
Source: Int J Mol Sci. 2023 Oct 10;24(20):15043. doi: 10.3390/ijms242015043 (PMC10606461; doi:10.3390/ijms242015043)
Supplement: Supplementary file 1 [file ijms-24-15043-s001.zip › Supplementary Table S3.xlsx]

## Sheet: Bacteria
Supplementary Table S3. (a) Discriminant result of LEfSE of soil bacteria.
Species name	Treatment	Mean	LDA_value	Pvalue
p__Ascomycota.c__Leotiomycetes	PSBC	5.07976	4.43007	0.0273237
p__Ascomycota.c__Leotiomycetes.o__Helotiales.f__Sclerotiniaceae	PSBC	4.56207	4.00121	0.0389902
p__Basidiomycota.c__Agaricomycetes.o__Polyporales.f__Polyporaceae	CK	4.16889	3.8362	0.0379415
p__Basidiomycota.c__Agaricomycetes.o__Corticiales	PSBC	4.1975	3.81746	0.0273237
p__Basidiomycota.c__Agaricomycetes.o__Polyporales	CK	4.49156	3.80977	0.0273237
p__Basidiomycota.c__Agaricomycetes.o__Corticiales.f__Punctulariaceae.g__Punctularia	PSBC	4.1975	3.79731	0.0273237
p__Basidiomycota.c__Agaricomycetes.o__Corticiales.f__Punctulariaceae	PSBC	4.1975	3.78919	0.0273237
p__Ascomycota.c__Eurotiomycetes.o__Onygenales.f__Ascosphaeraceae	PBC	3.99885	3.73488	0.0459381
p__Ascomycota.c__Eurotiomycetes.o__Onygenales.f__Ascosphaeraceae.g__Ascosphaera	PBC	3.99885	3.70788	0.0459381
p__Ascomycota.c__Sordariomycetes.o__Xylariales.f__Xylariaceae.g__Xylaria	PSBC	3.64959	3.53035	0.0347353
p__Mucoromycota.c__Mucoromycetes.o__Mucorales.f__Choanephoraceae	CK	3.69234	3.45454	0.0459381
p__Mucoromycota.c__Mucoromycetes.o__Mucorales.f__Choanephoraceae.g__Choanephora	CK	3.69234	3.4513	0.0459381
p__Ascomycota.c__Dothideomycetes.o__Capnodiales.f__Capnodiaceae.g__Polychaeton	PSBC	3.48711	3.43406	0.0347353
p__Ascomycota.c__Dothideomycetes.o__Capnodiales.f__Capnodiaceae	PSBC	3.48711	3.42792	0.0347353
p__Ascomycota.c__Pezizomycetes.o__Pezizales.f__Pyronemataceae	PBC	3.53729	3.41824	0.0265095
p__Ascomycota.c__Leotiomycetes.o__Helotiales.f__Chlorociboriaceae.g__Chlorociboria	CK	3.22702	3.35131	0.0339856
p__Ascomycota.c__Leotiomycetes.o__Helotiales.f__Chlorociboriaceae	CK	3.22702	3.33306	0.0339856
p__Basidiomycota.c__Agaricomycetes.o__Polyporales.f__Polyporaceae.g__Dichomitus	PSBC	3.45383	3.30722	0.0347353
p__Microsporidia.c__unclassified_p__Microsporidia.o__unclassified_p__Microsporidia.f__Dubosqiidae	PBC	3.38992	3.26339	0.0347353
p__Mucoromycota.c__Glomeromycetes.o__Diversisporales.f__Gigasporaceae.g__Gigaspora	CK	3.49852	3.25529	0.0459381
p__Microsporidia.c__unclassified_p__Microsporidia.o__unclassified_p__Microsporidia.f__Dubosqiidae.g__Hamiltosporidium	PBC	3.38992	3.25015	0.0347353
p__Mucoromycota.c__Glomeromycetes.o__Diversisporales.f__Gigasporaceae	CK	3.49852	3.21923	0.0459381
p__Ascomycota.c__Sordariomycetes.o__Xylariales.f__Pseudomassariaceae.g__Pseudomassariella	PSBC	3.24365	3.20393	0.0459381
p__Ascomycota.c__Sordariomycetes.o__Xylariales.f__Pseudomassariaceae	PSBC	3.24365	3.19146	0.0459381
p__Ascomycota.c__Pezizomycetes.o__Pezizales.f__Ascobolaceae		2.97757	0	-
p__Ascomycota.c__Pezizomycetes.o__Pezizales		4.06131	0	-
p__Ascomycota.c__Sordariomycetes.o__Ophiostomatales.f__Ophiostomataceae		3.53384	0	-
p__Basidiomycota.c__Agaricomycetes.o__Auriculariales.f__Exidiaceae		3.70506	0	-
p__Ascomycota.c__Dothideomycetes.o__Venturiales.f__Cylindrosympodiaceae		3.87394	0	-
p__Ascomycota.c__unclassified_p__Ascomycota.o__unclassified_p__Ascomycota.f__unclassified_p__Ascomycota.g__Saitoella		3.23418	0	-
p__Chytridiomycota.c__Chytridiomycetes.o__Chytridiales.f__Chytriomycetaceae.g__Rhizoclosmatium		2.97757	0	-
p__Mucoromycota.c__Mucoromycetes.o__Mucorales.f__Cunninghamellaceae.g__Absidia		3.03058	0	-
p__Ascomycota.c__Dothideomycetes.o__Patellariales.f__Patellariaceae.g__Patellaria		3.33619	0	-
p__Mucoromycota.c__Endogonomycetes.o__Endogonales.f__unclassified_o__Endogonales.g__Bifiguratus		3.52402	0	-
p__Ascomycota.c__Sordariomycetes.o__Sordariales		4.21738	0	-
p__Chytridiomycota.c__Chytridiomycetes.o__Spizellomycetales.f__Spizellomycetaceae.g__Spizellomyces		3.91113	0	-
p__Ascomycota.c__Sordariomycetes.o__Coniochaetales.f__Coniochaetaceae.g__Coniochaeta		3.69316	0	-
p__Basidiomycota.c__Exobasidiomycetes.o__Tilletiales		3.56119	0	-
p__Ascomycota.c__Sordariomycetes.o__Coniochaetales.f__Coniochaetaceae		3.69316	0	-
p__Basidiomycota.c__Agaricomycetes.o__Hymenochaetales.f__Hymenochaetaceae.g__Sanghuangporus		3.396	0	-
p__Basidiomycota.c__Exobasidiomycetes.o__Microstromatales.f__unclassified_o__Microstromatales		2.80148	0	-
p__Chytridiomycota.c__Chytridiomycetes		4.28687	0	-
p__Basidiomycota.c__Wallemiomycetes		3.17914	0	-
p__Ascomycota.c__Sordariomycetes.o__Hypocreales.f__Ophiocordycipitaceae		4.33966	0	-
p__Chytridiomycota.c__Neocallimastigomycetes.o__Neocallimastigales.f__Neocallimastigaceae		3.94868	0	-
p__Mucoromycota.c__Glomeromycetes		4.78876	0	-
p__Ascomycota.c__Sordariomycetes.o__Xylariales.f__Diatrypaceae.g__Eutypa		2.45581	0	-
p__Basidiomycota.c__Pucciniomycetes.o__Pucciniales		4.07926	0	-
p__Ascomycota.c__Sordariomycetes.o__Xylariales.f__unclassified_o__Xylariales		4.63333	0	-
p__Basidiomycota.c__Agaricomycetes.o__Trechisporales		3.6018	0	-
p__Ascomycota.c__Dothideomycetes.o__Pleosporales.f__Didymellaceae		4.02198	0	-
p__Basidiomycota.c__Microbotryomycetes.o__Sporidiobolales.f__Sporidiobolaceae		3.09996	0	-
p__Ascomycota.c__Eurotiomycetes.o__Chaetothyriales.f__Herpotrichiellaceae.g__Rhinocladiella		3.05195	0	-
p__Ascomycota.c__Schizosaccharomycetes.o__Schizosaccharomycetales.f__Schizosaccharomycetaceae		3.28193	0	-
p__Basidiomycota.c__Exobasidiomycetes.o__Microstromatales.f__unclassified_o__Microstromatales.g__Pseudomicrostroma		2.80148	0	-
p__Ascomycota.c__Pezizomycetes.o__Pezizales.f__Morchellaceae.g__Morchella		3.51258	0	-
p__Ascomycota.c__Eurotiomycetes.o__Eurotiales.f__Aspergillaceae.g__Penicilliopsis		3.77658	0	-
p__Ascomycota.c__Saccharomycetes.o__Saccharomycetales.f__Lipomycetaceae		4.30804	0	-
p__Ascomycota.c__Leotiomycetes.o__Helotiales.f__Rutstroemiaceae		2.50543	0	-
p__Ascomycota.c__Neolectomycetes.o__Neolectales.f__Neolectaceae.g__Neolecta		3.24609	0	-
p__Ascomycota.c__Dothideomycetes.o__Pleosporales.f__Pleosporaceae.g__Bipolaris		3.66747	0	-
p__Ascomycota.c__Sordariomycetes.o__Magnaporthales.f__Magnaporthaceae.g__Magnaporthiopsis		3.09996	0	-
p__Chytridiomycota.c__Neocallimastigomycetes.o__Neocallimastigales.f__Neocallimastigaceae.g__Anaeromyces		3.45655	0	-
p__Ascomycota.c__Dothideomycetes.o__Pleosporales.f__Sporormiaceae.g__Westerdykella		3.48625	0	-
p__Ascomycota.c__Neolectomycetes.o__Neolectales		3.24609	0	-
p__Ascomycota.c__Dothideomycetes.o__Dothideales.f__Saccotheciaceae.g__Aureobasidium		3.55206	0	-
p__Ascomycota.c__Dothideomycetes.o__Mycosphaerellales		4.19345	0	-
p__Ascomycota.c__Orbiliomycetes.o__Orbiliales.f__Orbiliaceae.g__Drechslerella		3.53924	0	-
p__Basidiomycota.c__Agaricomycetes.o__Gloeophyllales.f__Gloeophyllaceae		3.33528	0	-
p__Ascomycota.c__Eurotiomycetes.o__Onygenales.f__Ajellomycetaceae.g__Histoplasma		3.8138	0	-
p__Zoopagomycota.c__Kickxellomycetes		3.63289	0	-
p__Basidiomycota.c__Agaricomycetes.o__Agaricales.f__Cortinariaceae		3.39416	0	-
p__Ascomycota.c__Leotiomycetes.o__unclassified_c__Leotiomycetes.f__Myxotrichaceae		3.88563	0	-
p__Basidiomycota.c__Exobasidiomycetes.o__Georgefischeriales		3.4713	0	-
p__Ascomycota.c__Dothideomycetes.o__unclassified_c__Dothideomycetes.f__Gloniaceae.g__Glonium		4.16316	0	-
p__Ascomycota.c__Sordariomycetes.o__Hypocreales.f__Cordycipitaceae.g__Cordyceps		3.93385	0	-
p__Ascomycota.c__Dothideomycetes.o__Mytilinidiales.f__Mytilinidiaceae.g__Lophium		3.4522	0	-
p__Ascomycota.c__Sordariomycetes.o__Hypocreales.f__Ophiocordycipitaceae.g__Purpureocillium		3.65663	0	-
p__Basidiomycota.c__Agaricomycetes.o__Polyporales.f__Dacryobolaceae		3.24221	0	-
p__Ascomycota.c__Leotiomycetes.o__Helotiales.f__unclassified_o__Helotiales.g__Cadophora		3.69031	0	-
p__Basidiomycota.c__Agaricomycetes.o__Sebacinales.f__Serendipitaceae.g__Serendipita		4.31949	0	-
p__Ascomycota.c__Saccharomycetes.o__Saccharomycetales.f__Saccharomycetaceae.g__Kluyveromyces		2.96819	0	-
p__Zoopagomycota.c__Zoopagomycetes		3.8306	0	-
p__Ascomycota.c__Eurotiomycetes.o__Chaetothyriales.f__unclassified_o__Chaetothyriales		3.49269	0	-
p__Ascomycota.c__Dothideomycetes.o__Venturiales.f__Cylindrosympodiaceae.g__Tothia		3.87394	0	-
p__Ascomycota.c__Eurotiomycetes.o__Eurotiales.f__Trichocomaceae.g__Talaromyces		4.11016	0	-
p__Ascomycota.c__Saccharomycetes.o__Saccharomycetales.f__unclassified_o__Saccharomycetales		3.00305	0	-
p__Mucoromycota.c__Glomeromycetes.o__Glomerales.f__Glomeraceae		4.44496	0	-
p__Basidiomycota.c__Agaricomycetes.o__Agaricales.f__Psathyrellaceae		3.48146	0	-
p__Basidiomycota.c__Exobasidiomycetes.o__Exobasidiales.f__Cryptobasidiaceae.g__Acaromyces		3.38311	0	-
p__Ascomycota.c__Sordariomycetes.o__Xylariales.f__Xylariaceae.g__Rosellinia		2.87811	0	-
p__Ascomycota.c__Dothideomycetes.o__unclassified_c__Dothideomycetes.f__Pseudoperisporiaceae		3.91493	0	-
p__Ascomycota.c__Leotiomycetes.o__Helotiales.f__Mollisiaceae.g__Phialocephala_f__Mollisiaceae		4.17797	0	-
p__Ascomycota.c__Eurotiomycetes.o__Eurotiales.f__Trichocomaceae		4.11016	0	-
p__Microsporidia.c__unclassified_p__Microsporidia		3.77865	0	-
p__Ascomycota.c__Lecanoromycetes.o__Umbilicariales.f__Umbilicariaceae.g__Lasallia		4.4612	0	-
p__Mucoromycota.c__Mucoromycetes.o__Mucorales.f__Rhizopodaceae		3.69125	0	-
p__Ascomycota.c__Leotiomycetes.o__Helotiales.f__Leotiaceae		3.08076	0	-
p__Ascomycota.c__Eurotiomycetes.o__Chaetothyriales.f__Herpotrichiellaceae.g__Capronia		2.40099	0	-
p__Basidiomycota.c__Tremellomycetes.o__Trichosporonales.f__Trichosporonaceae.g__Vanrija		3.26666	0	-
p__Ascomycota.c__Pezizomycetes.o__Pezizales.f__Pyronemataceae.g__Sphaerosporella		3.34911	0	-
p__Basidiomycota.c__Agaricomycetes.o__Cantharellales.f__Ceratobasidiaceae		4.17446	0	-
p__Ascomycota.c__Sordariomycetes.o__Hypocreales.f__Clavicipitaceae		4.23457	0	-
p__Basidiomycota.c__Agaricomycetes.o__Boletales.f__Coniophoraceae.g__Coniophora		3.79993	0	-
p__Ascomycota.c__Eurotiomycetes.o__Chaetothyriales.f__Herpotrichiellaceae.g__Exophiala		3.69175	0	-
p__Basidiomycota.c__Agaricomycetes.o__Amylocorticiales.f__Amylocorticiaceae.g__Plicaturopsis		3.38245	0	-
p__Ascomycota.c__Sordariomycetes.o__Sordariales.f__Chaetomiaceae.g__Chaetomium		3.90835	0	-
p__Chytridiomycota.c__Chytridiomycetes.o__Spizellomycetales		3.91113	0	-
p__Mucoromycota.c__Mucoromycetes.o__Mucorales.f__Mucoraceae.g__Mucor		4.61611	0	-
p__Mucoromycota.c__Endogonomycetes.o__Endogonales.f__Endogonaceae.g__Jimgerdemannia		2.97757	0	-
p__Ascomycota.c__Sordariomycetes.o__Hypocreales.f__Ophiocordycipitaceae.g__Drechmeria		3.68504	0	-
p__Basidiomycota.c__Pucciniomycetes		4.07926	0	-
p__Ascomycota.c__Dothideomycetes.o__Mycosphaerellales.f__Mycosphaerellaceae.g__Zymoseptoria		3.78353	0	-
p__Ascomycota.c__Neolectomycetes		3.24609	0	-
p__Ascomycota.c__Saccharomycetes.o__Saccharomycetales.f__Debaryomycetaceae		3.51709	0	-
p__Ascomycota.c__Leotiomycetes.o__unclassified_c__Leotiomycetes		4.59692	0	-
p__Ascomycota.c__Dothideomycetes.o__Botryosphaeriales.f__Botryosphaeriaceae.g__Macrophomina		2.92702	0	-
p__Basidiomycota.c__Agaricomycetes.o__Hymenochaetales		3.77032	0	-
p__Microsporidia.c__unclassified_p__Microsporidia.o__unclassified_p__Microsporidia.f__unclassified_p__Microsporidia		3.75779	0	-
p__Ascomycota.c__Pezizomycetes.o__Pezizales.f__Tuberaceae.g__Tuber		3.72291	0	-
p__Ascomycota.c__Dothideomycetes.o__Pleosporales.f__Lindgomycetaceae.g__Lindgomyces		3.53058	0	-
p__Ascomycota.c__Leotiomycetes.o__Helotiales.f__Pleuroascaceae.g__Venustampulla		2.98213	0	-
p__Ascomycota.c__Schizosaccharomycetes.o__Schizosaccharomycetales.f__Schizosaccharomycetaceae.g__Schizosaccharomyces		3.28193	0	-
p__Ascomycota.c__Leotiomycetes.o__Erysiphales.f__Erysiphaceae.g__Erysiphe		3.87568	0	-
p__Basidiomycota.c__Agaricomycetes.o__Cantharellales.f__Tulasnellaceae		3.81718	0	-
p__Ascomycota.c__Sordariomycetes.o__Microascales.f__Microascaceae.g__Scedosporium		2.50543	0	-
p__Zoopagomycota		4.34798	0	-
p__Ascomycota.c__Eurotiomycetes.o__Eurotiales.f__Aspergillaceae		5.03179	0	-
p__Mucoromycota.c__Glomeromycetes.o__Glomerales		4.44496	0	-
p__Ascomycota.c__Dothideomycetes.o__Mytilinidiales		3.67622	0	-
p__Basidiomycota.c__Agaricomycetes.o__Agaricales.f__Schizophyllaceae.g__Schizophyllum		3.30091	0	-
p__Ascomycota.c__Sordariomycetes.o__Microascales		2.87795	0	-
p__Mucoromycota.c__Mortierellomycetes.o__Mortierellales		3.78424	0	-
p__Ascomycota.c__unclassified_p__Ascomycota.o__unclassified_p__Ascomycota		3.23418	0	-
p__Ascomycota.c__Dothideomycetes.o__Pleosporales.f__Sporormiaceae		3.48625	0	-
p__Basidiomycota.c__Agaricomycetes.o__Auriculariales.f__Auriculariaceae		2.96819	0	-
p__Basidiomycota.c__Dacrymycetes.o__Dacrymycetales.f__Dacrymycetaceae.g__Calocera		3.43105	0	-
p__Basidiomycota.c__Agaricomycetes.o__Trechisporales.f__Hydnodontaceae.g__Sistotremastrum		3.6018	0	-
p__Ascomycota.c__Dothideomycetes.o__Pleosporales.f__Pleosporaceae		4.14015	0	-
p__Zoopagomycota.c__Entomophthoromycetes.o__Entomophthorales		3.80631	0	-
p__Chytridiomycota.c__Monoblepharidomycetes.o__Monoblepharidales		3.74627	0	-
p__Zoopagomycota.c__Kickxellomycetes.o__Kickxellales		3.63289	0	-
p__Ascomycota.c__Dothideomycetes.o__unclassified_c__Dothideomycetes.f__Zopfiaceae		4.57652	0	-
p__Ascomycota.c__Leotiomycetes.o__Helotiales.f__Lachnaceae.g__Lachnellula		2.75684	0	-
p__Basidiomycota.c__Agaricomycetes.o__Polyporales.f__Gelatoporiaceae.g__Obba_f__Gelatoporiaceae		3.56016	0	-
p__Ascomycota.c__Dothideomycetes.o__Pleosporales		4.64868	0	-
p__Ascomycota.c__Sordariomycetes.o__Glomerellales.f__Plectosphaerellaceae		3.75739	0	-
p__Basidiomycota.c__Agaricomycetes.o__Hymenochaetales.f__unclassified_o__Hymenochaetales		2.75684	0	-
p__Mucoromycota.c__Endogonomycetes.o__Endogonales.f__unclassified_o__Endogonales		3.52402	0	-
p__Ascomycota.c__Schizosaccharomycetes		3.28193	0	-
p__Ascomycota.c__Dothideomycetes.o__Cladosporiales.f__Cladosporiaceae.g__Cladosporium		3.27425	0	-
p__Ascomycota.c__Sordariomycetes.o__Hypocreales.f__Stachybotryaceae.g__Stachybotrys		3.821	0	-
p__Basidiomycota.c__Ustilaginomycetes.o__Ustilaginales.f__Ustilaginaceae.g__Sporisorium		2.80646	0	-
p__Ascomycota.c__Dothideomycetes.o__Pleosporales.f__Lindgomycetaceae		4.00436	0	-
p__Mucoromycota.c__Mucoromycetes.o__Mucorales.f__Lichtheimiaceae.g__Lichtheimia		3.58563	0	-
p__Ascomycota.c__Saccharomycetes.o__Saccharomycetales.f__Metschnikowiaceae		3.63539	0	-
p__Cryptomycota.c__unclassified_p__Cryptomycota.o__unclassified_p__Cryptomycota.f__unclassified_p__Cryptomycota.g__Paramicrosporidium		3.80033	0	-
p__Basidiomycota.c__Exobasidiomycetes.o__Entylomatales.f__unclassified_o__Entylomatales.g__Tilletiopsis		3.34378	0	-
p__Basidiomycota.c__Agaricomycetes.o__Amylocorticiales		3.38245	0	-
p__Basidiomycota.c__Exobasidiomycetes.o__Georgefischeriales.f__Tilletiariaceae		3.4713	0	-
p__Ascomycota.c__Dothideomycetes.o__Cladosporiales		3.57895	0	-
p__Ascomycota.c__Saccharomycetes.o__Saccharomycetales.f__Saccharomycetaceae.g__Naumovozyma		2.93293	0	-
p__Blastocladiomycota.c__Blastocladiomycetes.o__Blastocladiales.f__Catenariaceae		3.33616	0	-
p__Ascomycota.c__Dothideomycetes.o__unclassified_c__Dothideomycetes.f__Gloniaceae.g__Cenococcum		4.41755	0	-
p__Basidiomycota.c__Agaricomycetes.o__Polyporales.f__Phanerochaetaceae		2.44989	0	-
p__Ascomycota.c__Dothideomycetes.o__Venturiales		4.14501	0	-
p__Ascomycota.c__Saccharomycetes.o__Saccharomycetales.f__Lipomycetaceae.g__Lipomyces		4.30804	0	-
p__Ascomycota.c__Sordariomycetes.o__Microascales.f__Microascaceae		2.87795	0	-
p__Ascomycota.c__Sordariomycetes.o__Magnaporthales.f__Magnaporthaceae.g__Gaeumannomyces		3.05787	0	-
p__Mucoromycota.c__Mucoromycetes.o__Mucorales		4.69539	0	-
p__Ascomycota.c__Dothideomycetes.o__Dothideales		3.55206	0	-
p__Basidiomycota.c__Agaricomycetes.o__Polyporales.f__Gelatoporiaceae		4.09724	0	-
p__Ascomycota.c__Saccharomycetes.o__Saccharomycetales		4.48667	0	-
p__Ascomycota.c__Eurotiomycetes.o__Chaetothyriales.f__Herpotrichiellaceae		4.10308	0	-
p__Ascomycota.c__Leotiomycetes.o__Helotiales.f__Hyaloscyphaceae.g__Hyaloscypha		3.39264	0	-
p__Ascomycota.c__Sordariomycetes.o__Hypocreales.f__Clavicipitaceae.g__Moelleriella		3.50209	0	-
p__Ascomycota.c__Sordariomycetes.o__Glomerellales		4.43635	0	-
p__Ascomycota.c__Dothideomycetes.o__Pleosporales.f__Massarinaceae.g__Massarina		3.22401	0	-
p__Basidiomycota.c__Agaricomycetes.o__Cantharellales.f__Tulasnellaceae.g__Tulasnella		3.81718	0	-
p__Basidiomycota.c__Agaricomycetes.o__Sebacinales		4.31949	0	-
p__Ascomycota.c__Dothideomycetes.o__Phaeotrichales		3.29368	0	-
p__Basidiomycota.c__Agaricomycetes.o__Trechisporales.f__Hydnodontaceae		3.6018	0	-
p__Ascomycota.c__Dothideomycetes.o__Pleosporales.f__unclassified_o__Pleosporales.g__Aaosphaeria		3.40541	0	-
p__Ascomycota.c__Eurotiomycetes.o__Chaetothyriales.f__unclassified_o__Chaetothyriales.g__unclassified_o__Chaetothyriales		3.49269	0	-
p__Basidiomycota.c__Agaricomycetes.o__Boletales.f__Coniophoraceae		3.79993	0	-
p__Ascomycota.c__Leotiomycetes.o__Helotiales.f__unclassified_o__Helotiales		3.76288	0	-
p__Ascomycota.c__Pezizomycetes		4.06131	0	-
p__Ascomycota.c__Orbiliomycetes.o__Orbiliales.f__Orbiliaceae.g__Dactylellina		3.79898	0	-
p__Ascomycota.c__Dothideomycetes.o__Lineolatales		2.85449	0	-
p__Basidiomycota.c__Agaricomycetes.o__Polyporales.f__Phanerochaetaceae.g__Phlebiopsis		2.44989	0	-
p__Mucoromycota.c__Mucoromycetes.o__Mucorales.f__Syncephalastraceae		2.93293	0	-
p__Ascomycota.c__Eurotiomycetes		5.21144	0	-
p__Ascomycota.c__Dothideomycetes.o__Pleosporales.f__Tetraplosphaeriaceae		3.37519	0	-
p__Ascomycota.c__Dothideomycetes.o__Patellariales		3.33619	0	-
p__Basidiomycota		5.27119	0	-
p__Ascomycota.c__Leotiomycetes.o__Helotiales.f__Hyaloscyphaceae		3.39264	0	-
p__Ascomycota.c__Eurotiomycetes.o__Eurotiales.f__Aspergillaceae.g__unclassified_f__Aspergillaceae		3.57985	0	-
p__Basidiomycota.c__Exobasidiomycetes.o__Entylomatales		3.34378	0	-
p__Basidiomycota.c__Tremellomycetes.o__Trichosporonales.f__Trichosporonaceae.g__Trichosporon		2.98255	0	-
p__Ascomycota.c__Sordariomycetes.o__Magnaporthales		3.30091	0	-
p__Ascomycota.c__Dothideomycetes.o__Botryosphaeriales.f__Aplosporellaceae		3.28027	0	-
p__Ascomycota.c__Leotiomycetes.o__Helotiales.f__Pleuroascaceae		2.98213	0	-
p__Basidiomycota.c__Agaricomycetes.o__Russulales.f__Peniophoraceae		3.32212	0	-
p__Chytridiomycota.c__Chytridiomycetes.o__Spizellomycetales.f__Spizellomycetaceae		3.91113	0	-
p__Basidiomycota.c__Tremellomycetes.o__Tremellales		4.4328	0	-
p__Ascomycota.c__Dothideomycetes.o__Pleosporales.f__Pleosporaceae.g__Alternaria		3.56655	0	-
p__Ascomycota.c__Sordariomycetes.o__Hypocreales.f__Stachybotryaceae		3.821	0	-
p__Mucoromycota.c__Mucoromycetes.o__Mucorales.f__Mucoraceae		4.62795	0	-
p__Chytridiomycota.c__Neocallimastigomycetes.o__Neocallimastigales		3.94868	0	-
p__Ascomycota.c__Leotiomycetes.o__Erysiphales		3.944	0	-
p__Basidiomycota.c__Agaricomycetes.o__Sebacinales.f__Serendipitaceae		4.31949	0	-
p__Ascomycota.c__Leotiomycetes.o__Helotiales.f__Sclerotiniaceae.g__Botrytis		3.80792	0	-
p__Ascomycota.c__Dothideomycetes.o__Mycosphaerellales.f__Mycosphaerellaceae.g__Cercospora		3.40414	0	-
p__Basidiomycota.c__Agaricomycetes.o__Polyporales.f__Polyporaceae.g__Trametes		4.02834	0	-
p__Ascomycota.c__Sordariomycetes.o__Glomerellales.f__Glomerellaceae		4.33429	0	-
p__Chytridiomycota.c__Chytridiomycetes.o__Spizellomycetales.f__Powellomycetaceae		2.50045	0	-
p__Ascomycota.c__Dothideomycetes.o__Pleosporales.f__Pleosporaceae.g__Exserohilum		2.49107	0	-
p__Basidiomycota.c__Agaricomycetes.o__Polyporales.f__Grifolaceae		3.26666	0	-
p__Ascomycota.c__Dothideomycetes.o__Pleosporales.f__Periconiaceae		3.34388	0	-
p__Chytridiomycota.c__Chytridiomycetes.o__Synchytriales.f__Synchytriaceae		3.99991	0	-
p__Ascomycota.c__Dothideomycetes.o__Microthyriales.f__Microthyriaceae		3.10251	0	-
p__Basidiomycota.c__Agaricomycetes.o__Geastrales		3.22805	0	-
p__Ascomycota.c__Sordariomycetes.o__Hypocreales.f__Nectriaceae.g__Fusarium		4.59486	0	-
p__Chytridiomycota.c__Monoblepharidomycetes.o__Monoblepharidales.f__Gonapodyaceae		3.74627	0	-
p__Ascomycota.c__Dothideomycetes.o__Mycosphaerellales.f__Teratosphaeriaceae.g__Acidomyces		3.15742	0	-
p__Ascomycota.c__Leotiomycetes.o__Helotiales.f__Mollisiaceae		4.17797	0	-
p__Ascomycota.c__Eurotiomycetes.o__Onygenales.f__Ajellomycetaceae		3.86143	0	-
p__Basidiomycota.c__Agaricomycetes.o__Agaricales.f__Lyophyllaceae		3.53245	0	-
p__Ascomycota.c__Sordariomycetes.o__Hypocreales.f__Nectriaceae		4.61517	0	-
p__Ascomycota.c__Eurotiomycetes.o__Chaetothyriales		4.17825	0	-
p__Basidiomycota.c__Agaricomycetes.o__Atheliales		3.62875	0	-
p__Mucoromycota.c__Mortierellomycetes.o__Mortierellales.f__Mortierellaceae.g__Mortierella		3.78424	0	-
p__Ascomycota.c__Sordariomycetes.o__Diaporthales.f__Diaporthaceae		3.23396	0	-
p__Basidiomycota.c__Microbotryomycetes.o__Sporidiobolales.f__Sporidiobolaceae.g__Rhodotorula		3.09996	0	-
p__Ascomycota.c__Dothideomycetes.o__Botryosphaeriales		3.91361	0	-
p__Ascomycota.c__Sordariomycetes.o__Hypocreales.f__unclassified_o__Hypocreales		3.88314	0	-
p__Ascomycota.c__Eurotiomycetes.o__Eurotiales		5.0981	0	-
p__Ascomycota.c__Dothideomycetes.o__Mycosphaerellales.f__Teratosphaeriaceae.g__Hortaea		3.88869	0	-
p__Basidiomycota.c__Agaricomycetes.o__Polyporales.f__Polyporaceae.g__Ganoderma		3.61054	0	-
p__Ascomycota.c__Eurotiomycetes.o__Verrucariales		3.65516	0	-
p__Ascomycota.c__Leotiomycetes.o__Erysiphales.f__Erysiphaceae		3.944	0	-
p__Basidiomycota.c__Dacrymycetes		3.43105	0	-
p__Basidiomycota.c__Agaricomycetes.o__Agaricales.f__Physalacriaceae.g__Cylindrobasidium		3.17898	0	-
p__Basidiomycota.c__Agaricomycetes.o__Agaricales.f__Psathyrellaceae.g__Coprinopsis		3.46207	0	-
p__Chytridiomycota.c__Chytridiomycetes.o__Spizellomycetales.f__Powellomycetaceae.g__Powellomyces		2.50045	0	-
p__Ascomycota.c__Dothideomycetes.o__Mycosphaerellales.f__Teratosphaeriaceae.g__Neohortaea		2.44989	0	-
p__Basidiomycota.c__Tremellomycetes.o__Tremellales.f__Trimorphomycetaceae		4.34944	0	-
p__Ascomycota.c__Dothideomycetes.o__Pleosporales.f__Leptosphaeriaceae.g__Leptosphaeria		2.70202	0	-
p__Ascomycota.c__Lecanoromycetes.o__Umbilicariales.f__Umbilicariaceae		4.4612	0	-
p__Ascomycota.c__Pezizomycetes.o__Pezizales.f__Ascobolaceae.g__Ascobolus		2.97757	0	-
p__Basidiomycota.c__Agaricomycetes.o__Cantharellales		4.29865	0	-
p__Basidiomycota.c__Agaricomycetes.o__Agaricales.f__Strophariaceae.g__Psilocybe		2.87811	0	-
p__Basidiomycota.c__Tremellomycetes.o__Tremellales.f__Trimorphomycetaceae.g__Saitozyma		4.34944	0	-
p__Mucoromycota		5.06185	0	-
p__Chytridiomycota.c__Monoblepharidomycetes.o__Monoblepharidales.f__Gonapodyaceae.g__Gonapodya		3.74627	0	-
p__Ascomycota.c__Dothideomycetes.o__Pleosporales.f__Leptosphaeriaceae		3.62309	0	-
p__Ascomycota.c__Saccharomycetes.o__Saccharomycetales.f__Debaryomycetaceae.g__Candida_f__Debaryomycetaceae		3.51709	0	-
p__Basidiomycota.c__Exobasidiomycetes.o__Exobasidiales.f__Cryptobasidiaceae		3.38311	0	-
p__Basidiomycota.c__Agaricomycetes.o__Agaricales		4.7252	0	-
p__Mucoromycota.c__Mortierellomycetes.o__Mortierellales.f__Mortierellaceae		3.78424	0	-
p__Ascomycota.c__Eurotiomycetes.o__Eurotiales.f__Thermoascaceae.g__Byssochlamys		3.722	0	-
p__Basidiomycota.c__Agaricomycetes.o__Agaricales.f__Omphalotaceae.g__Lentinula		3.2713	0	-
p__Ascomycota		5.83617	0	-
p__Ascomycota.c__Leotiomycetes.o__unclassified_c__Leotiomycetes.f__unclassified_c__Leotiomycetes		3.5955	0	-
p__Ascomycota.c__Sordariomycetes.o__Hypocreales.f__Bionectriaceae.g__Gliomastix		2.87811	0	-
p__Basidiomycota.c__Tremellomycetes.o__Tremellales.f__Tremellaceae.g__Tremella		3.40199	0	-
p__Ascomycota.c__Saccharomycetes.o__Saccharomycetales.f__Metschnikowiaceae.g__Clavispora		3.63539	0	-
p__Ascomycota.c__Sordariomycetes.o__Hypocreales.f__Cordycipitaceae		4.07688	0	-
p__Ascomycota.c__Dothideomycetes.o__Pleosporales.f__Didymellaceae.g__Didymella		3.41544	0	-
p__Basidiomycota.c__Agaricomycetes.o__Hymenochaetales.f__unclassified_o__Hymenochaetales.g__Rickenella		2.75684	0	-
p__Basidiomycota.c__Malasseziomycetes.o__Malasseziales.f__Malasseziaceae		3.70483	0	-
p__Basidiomycota.c__Microbotryomycetes		3.09996	0	-
p__Ascomycota.c__Dothideomycetes.o__Mycosphaerellales.f__Teratosphaeriaceae		3.99672	0	-
p__Ascomycota.c__Pezizomycetes.o__Pezizales.f__Pezizaceae.g__Terfezia		3.26422	0	-
p__Ascomycota.c__Dothideomycetes.o__Lineolatales.f__Lineolataceae		2.85449	0	-
p__Basidiomycota.c__Agaricomycetes.o__Gloeophyllales.f__Gloeophyllaceae.g__Gloeophyllum		3.33528	0	-
p__Ascomycota.c__Dothideomycetes.o__Pleosporales.f__Leptosphaeriaceae.g__Ophiobolus		3.62309	0	-
p__Basidiomycota.c__Exobasidiomycetes.o__Tilletiales.f__Tilletiaceae.g__Tilletia		3.56119	0	-
p__Ascomycota.c__Sordariomycetes.o__Magnaporthales.f__Magnaporthaceae		3.30091	0	-
p__Basidiomycota.c__Ustilaginomycetes.o__Ustilaginales.f__Ustilaginaceae		4.22746	0	-
p__Basidiomycota.c__Agaricomycetes.o__Hymenochaetales.f__Hymenochaetaceae		3.69908	0	-
p__Ascomycota.c__Dothideomycetes.o__Pleosporales.f__Massarinaceae		3.22401	0	-
p__Ascomycota.c__Pezizomycetes.o__Pezizales.f__Pyronemataceae.g__Pyronema		3.08339	0	-
p__Basidiomycota.c__Agaricomycetes.o__Amylocorticiales.f__Amylocorticiaceae		3.38245	0	-
p__Ascomycota.c__Orbiliomycetes.o__Orbiliales.f__Orbiliaceae		4.57644	0	-
p__Ascomycota.c__Pezizomycetes.o__Pezizales.f__Morchellaceae		3.51258	0	-
p__Ascomycota.c__Dothideomycetes.o__Botryosphaeriales.f__Botryosphaeriaceae.g__Lasiodiplodia		3.2044	0	-
p__Mucoromycota.c__Endogonomycetes.o__Endogonales		3.63264	0	-
p__Ascomycota.c__Sordariomycetes.o__Microascales.f__Microascaceae.g__Lomentospora		2.87795	0	-
p__Ascomycota.c__Sordariomycetes.o__Hypocreales.f__Clavicipitaceae.g__Metarhizium		4.03056	0	-
p__Ascomycota.c__Leotiomycetes.o__Helotiales.f__Dermateaceae.g__Coleophoma		4.12596	0	-
p__Ascomycota.c__Eurotiomycetes.o__Eurotiales.f__Elaphomycetaceae		3.53496	0	-
p__Basidiomycota.c__Ustilaginomycetes		4.22746	0	-
p__Basidiomycota.c__Tremellomycetes.o__Tremellales.f__Tremellaceae		3.40199	0	-
p__Zoopagomycota.c__Dimargaritomycetes		2.94019	0	-
p__Basidiomycota.c__Agaricomycetes.o__Agaricales.f__Strophariaceae.g__Hypholoma		3.4952	0	-
p__Basidiomycota.c__Agaricomycetes.o__Polyporales.f__Laetiporaceae.g__Laetiporus		3.16151	0	-
p__Ascomycota.c__Dothideomycetes.o__Cladosporiales.f__Cladosporiaceae.g__Rachicladosporium		3.28157	0	-
p__Basidiomycota.c__Agaricomycetes.o__Polyporales.f__Fomitopsidaceae		2.44989	0	-
p__Mucoromycota.c__Mucoromycetes.o__Mucorales.f__Syncephalastraceae.g__Syncephalastrum		2.93293	0	-
p__Basidiomycota.c__Pucciniomycetes.o__Pucciniales.f__Pucciniaceae.g__Puccinia		3.86497	0	-
p__Ascomycota.c__Dothideomycetes.o__Botryosphaeriales.f__Botryosphaeriaceae.g__Botryosphaeria		3.68234	0	-
p__Ascomycota.c__Eurotiomycetes.o__Chaetothyriales.f__Herpotrichiellaceae.g__Fonsecaea		3.82774	0	-
p__Basidiomycota.c__Agaricomycetes.o__Atheliales.f__Atheliaceae.g__Fibularhizoctonia		3.59823	0	-
p__Zoopagomycota.c__Zoopagomycetes.o__Zoopagales.f__Sigmoideomycetaceae.g__Thamnocephalis		3.63575	0	-
p__Ascomycota.c__Dothideomycetes.o__Venturiales.f__Venturiaceae.g__Venturia_f__Venturiaceae		3.93815	0	-
p__Ascomycota.c__Dothideomycetes.o__Pleosporales.f__Didymellaceae.g__Ascochyta		3.95465	0	-
p__Basidiomycota.c__Agaricomycetes.o__Agaricales.f__Agaricaceae		3.87163	0	-
p__Basidiomycota.c__Ustilaginomycetes.o__Ustilaginales		4.22746	0	-
p__Ascomycota.c__Sordariomycetes.o__Coniochaetales		3.69316	0	-
p__Chytridiomycota.c__Monoblepharidomycetes		3.74627	0	-
p__Ascomycota.c__Eurotiomycetes.o__Eurotiales.f__Aspergillaceae.g__Monascus_f__Aspergillaceae		3.09996	0	-
p__Basidiomycota.c__Pucciniomycetes.o__Pucciniales.f__Melampsoraceae		3.66973	0	-
p__Ascomycota.c__Eurotiomycetes.o__Chaetothyriales.f__Herpotrichiellaceae.g__Cladophialophora		3.51494	0	-
p__Ascomycota.c__Sordariomycetes.o__Hypocreales.f__Ophiocordycipitaceae.g__Ophiocordyceps		3.97251	0	-
p__Ascomycota.c__Eurotiomycetes.o__Eurotiales.f__Aspergillaceae.g__Penicillium		4.52578	0	-
p__Basidiomycota.c__Agaricomycetes.o__Agaricales.f__Mycenaceae.g__Mycena		3.62315	0	-
p__Cryptomycota.c__unclassified_p__Cryptomycota.o__unclassified_p__Cryptomycota.f__unclassified_p__Cryptomycota		3.80033	0	-
p__Ascomycota.c__Sordariomycetes.o__Xylariales.f__unclassified_o__Xylariales.g__Phialemoniopsis		3.19187	0	-
p__Ascomycota.c__Dothideomycetes.o__Acrospermales		3.34739	0	-
p__Ascomycota.c__Leotiomycetes.o__Helotiales.f__Rutstroemiaceae.g__Rutstroemia		2.50543	0	-
p__Ascomycota.c__Dothideomycetes.o__Capnodiales		3.71748	0	-
p__Basidiomycota.c__Pucciniomycetes.o__Pucciniales.f__Pucciniaceae		3.86497	0	-
p__Mucoromycota.c__Mucoromycetes.o__Mucorales.f__Lichtheimiaceae		3.58563	0	-
p__Basidiomycota.c__Agaricomycetes.o__Cantharellales.f__Ceratobasidiaceae.g__Ceratobasidium		3.7097	0	-
p__Basidiomycota.c__Tremellomycetes.o__Trichosporonales.f__Trichosporonaceae.g__Cutaneotrichosporon		2.87795	0	-
p__Mucoromycota.c__Mucoromycetes		4.69539	0	-
p__Ascomycota.c__Eurotiomycetes.o__Verrucariales.f__Verrucariaceae.g__Endocarpon		3.65516	0	-
p__Ascomycota.c__Pezizomycetes.o__Pezizales.f__Tuberaceae		3.72291	0	-
p__Zoopagomycota.c__Kickxellomycetes.o__Kickxellales.f__Kickxellaceae.g__Linderina		3.46915	0	-
p__Ascomycota.c__Orbiliomycetes.o__Orbiliales		4.57644	0	-
p__Basidiomycota.c__Malasseziomycetes.o__Malasseziales		3.70483	0	-
p__Mucoromycota.c__Glomeromycetes.o__Diversisporales.f__Diversisporaceae.g__Diversispora		4.48392	0	-
p__Basidiomycota.c__Agaricomycetes.o__Polyporales.f__Steccherinaceae.g__Antrodiella		3.05404	0	-
p__Zoopagomycota.c__Entomophthoromycetes		3.80631	0	-
p__Ascomycota.c__Lecanoromycetes		4.47523	0	-
p__Basidiomycota.c__Agaricomycetes.o__Hymenochaetales.f__Hymenochaetaceae.g__Phellinidium		2.86638	0	-
p__Ascomycota.c__Eurotiomycetes.o__Onygenales.f__Ajellomycetaceae.g__Helicocarpus		2.92702	0	-
p__Ascomycota.c__Dothideomycetes.o__Aulographales		3.85492	0	-
p__Ascomycota.c__Sordariomycetes.o__Hypocreales		4.98548	0	-
p__Ascomycota.c__Lecanoromycetes.o__Peltigerales		2.97757	0	-
p__Basidiomycota.c__Malasseziomycetes.o__Malasseziales.f__Malasseziaceae.g__Malassezia		3.70483	0	-
p__Ascomycota.c__Dothideomycetes.o__Mytilinidiales.f__Mytilinidiaceae.g__Mytilinidion		3.42717	0	-
p__Basidiomycota.c__Agaricomycetes.o__Polyporales.f__Laetiporaceae.g__Wolfiporia		3.35759	0	-
p__Zoopagomycota.c__Harpellomycetes.o__Harpellales.f__Legeriomycetaceae		3.83687	0	-
p__Zoopagomycota.c__Harpellomycetes.o__Harpellales.f__Harpellaceae.g__Furculomyces		3.18522	0	-
p__Ascomycota.c__Sordariomycetes.o__Glomerellales.f__Plectosphaerellaceae.g__Verticillium_f__Plectosphaerellaceae		3.75739	0	-
p__Ascomycota.c__Dothideomycetes.o__Pleosporales.f__Lindgomycetaceae.g__Clohesyomyces		3.82658	0	-
p__Ascomycota.c__Orbiliomycetes.o__Orbiliales.f__Orbiliaceae.g__Arthrobotrys		4.48467	0	-
p__Ascomycota.c__Sordariomycetes.o__Xylariales.f__unclassified_o__Xylariales.g__Monosporascus		4.62563	0	-
p__Basidiomycota.c__Exobasidiomycetes		3.95775	0	-
p__Basidiomycota.c__Agaricomycetes.o__Agaricales.f__Amanitaceae.g__Amanita		3.336	0	-
p__Basidiomycota.c__Agaricomycetes.o__Agaricales.f__unclassified_o__Agaricales		3.54794	0	-
p__Ascomycota.c__Dothideomycetes.o__Aulographales.f__Rhizodiscinaceae.g__Rhizodiscina		2.70202	0	-
p__Zoopagomycota.c__Entomophthoromycetes.o__Entomophthorales.f__Ancylistaceae.g__Conidiobolus		3.80631	0	-
p__Chytridiomycota.c__Chytridiomycetes.o__Chytridiales		2.97757	0	-
p__Mucoromycota.c__Endogonomycetes.o__Endogonales.f__Endogonaceae		2.97757	0	-
p__Ascomycota.c__Leotiomycetes.o__unclassified_c__Leotiomycetes.f__Myxotrichaceae.g__Oidiodendron		3.88563	0	-
p__Ascomycota.c__Dothideomycetes.o__Pleosporales.f__Trematosphaeriaceae.g__Trematosphaeria		3.39374	0	-
p__Ascomycota.c__Dothideomycetes.o__Botryosphaeriales.f__Aplosporellaceae.g__Aplosporella		3.28027	0	-
p__Ascomycota.c__Sordariomycetes.o__Hypocreales.f__Ophiocordycipitaceae.g__Tolypocladium		3.64041	0	-
p__Ascomycota.c__unclassified_p__Ascomycota.o__unclassified_p__Ascomycota.f__unclassified_p__Ascomycota		3.23418	0	-
p__Basidiomycota.c__Agaricomycetes.o__Gloeophyllales		3.33528	0	-
p__Basidiomycota.c__Ustilaginomycetes.o__Ustilaginales.f__Ustilaginaceae.g__Anthracocystis		2.75684	0	-
p__Zoopagomycota.c__Basidiobolomycetes.o__Basidiobolales		3.17914	0	-
p__Ascomycota.c__Eurotiomycetes.o__Onygenales.f__Arthrodermataceae.g__Microsporum		3.81299	0	-
p__Ascomycota.c__Dothideomycetes.o__Capnodiales.f__Piedraiaceae.g__Piedraia		3.35183	0	-
p__Basidiomycota.c__Agaricomycetes.o__Agaricales.f__Omphalotaceae		3.86543	0	-
p__Basidiomycota.c__Agaricomycetes.o__Agaricales.f__Physalacriaceae.g__Armillaria		3.63901	0	-
p__Zoopagomycota.c__Dimargaritomycetes.o__Dimargaritales.f__Dimargaritaceae		2.94019	0	-
p__Ascomycota.c__Pezizomycetes.o__Pezizales.f__Pezizaceae		3.26422	0	-
p__Ascomycota.c__Lecanoromycetes.o__Umbilicariales		4.4612	0	-
p__Basidiomycota.c__Agaricomycetes.o__Agaricales.f__unclassified_o__Agaricales.g__Dendrothele		3.54794	0	-
p__Zoopagomycota.c__Dimargaritomycetes.o__Dimargaritales.f__Dimargaritaceae.g__Dimargaris		2.94019	0	-
p__Ascomycota.c__Dothideomycetes.o__Pleosporales.f__Pleosporaceae.g__Curvularia		3.32847	0	-
p__Ascomycota.c__Sordariomycetes.o__Sordariales.f__Chaetomiaceae		4.13807	0	-
p__Ascomycota.c__Saccharomycetes.o__Saccharomycetales.f__Trigonopsidaceae.g__Tortispora		3.6567	0	-
p__Ascomycota.c__Eurotiomycetes.o__Onygenales.f__Arthrodermataceae		4.0218	0	-
p__Basidiomycota.c__Agaricomycetes.o__Russulales.f__Bondarzewiaceae		3.56488	0	-
p__Basidiomycota.c__Agaricomycetes.o__Auriculariales.f__Exidiaceae.g__Exidia		3.70506	0	-
p__Mucoromycota.c__Mucoromycetes.o__Mucorales.f__Mucoraceae.g__Parasitella		3.05787	0	-
p__Ascomycota.c__unclassified_p__Ascomycota		3.23418	0	-
p__Ascomycota.c__Sordariomycetes.o__Glomerellales.f__Glomerellaceae.g__Colletotrichum		4.33429	0	-
p__Ascomycota.c__Sordariomycetes		5.28116	0	-
p__Ascomycota.c__Leotiomycetes.o__unclassified_c__Leotiomycetes.f__unclassified_c__Leotiomycetes.g__Scytalidium		3.5955	0	-
p__Basidiomycota.c__Exobasidiomycetes.o__Georgefischeriales.f__Tilletiariaceae.g__Tilletiaria		3.4713	0	-
p__Basidiomycota.c__Agaricomycetes.o__Polyporales.f__Gelatoporiaceae.g__Gelatoporia		3.94829	0	-
p__Ascomycota.c__Saccharomycetes		4.48667	0	-
p__Basidiomycota.c__Agaricomycetes.o__Hymenochaetales.f__Schizoporaceae.g__Schizopora		3.41263	0	-
p__Mucoromycota.c__Mucoromycetes.o__Mucorales.f__Rhizopodaceae.g__Rhizopus		3.69125	0	-
p__Microsporidia.c__unclassified_p__Microsporidia.o__unclassified_p__Microsporidia.f__unclassified_p__Microsporidia.g__Mitosporidium		3.75779	0	-
p__Basidiomycota.c__Tremellomycetes.o__Tremellales.f__Cryptococcaceae.g__Cryptococcus_f__Cryptococcaceae		3.34388	0	-
p__Basidiomycota.c__Agaricomycetes.o__Boletales		3.91377	0	-
p__Chytridiomycota.c__Chytridiomycetes.o__Caulochytriales.f__Caulochytriaceae.g__Caulochytrium		2.7921	0	-
p__Chytridiomycota.c__Chytridiomycetes.o__Synchytriales		3.99991	0	-
p__Ascomycota.c__Dothideomycetes.o__Mycosphaerellales.f__Teratosphaeriaceae.g__Friedmanniomyces		3.42056	0	-
p__Ascomycota.c__Sordariomycetes.o__Diaporthales.f__Valsaceae.g__Valsa		3.76665	0	-
p__Ascomycota.c__Dothideomycetes.o__Eremomycetales.f__Eremomycetaceae.g__Eremomyces		3.296	0	-
p__Ascomycota.c__Sordariomycetes.o__Hypocreales.f__Cordycipitaceae.g__Beauveria		3.52497	0	-
p__Ascomycota.c__Sordariomycetes.o__Hypocreales.f__Nectriaceae.g__Ilyonectria		2.40099	0	-
p__Basidiomycota.c__Tremellomycetes.o__Trichosporonales.f__Trichosporonaceae		3.41544	0	-
p__Basidiomycota.c__Agaricomycetes.o__Agaricales.f__Tricholomataceae		3.87944	0	-
p__Ascomycota.c__Eurotiomycetes.o__Onygenales.f__Arthrodermataceae.g__Trichophyton		3.10376	0	-
p__Ascomycota.c__Eurotiomycetes.o__Onygenales.f__Arthrodermataceae.g__Nannizzia		3.46844	0	-
p__Chytridiomycota.c__Chytridiomycetes.o__Caulochytriales.f__Caulochytriaceae		2.7921	0	-
p__Ascomycota.c__Sordariomycetes.o__Xylariales.f__Diatrypaceae		2.45581	0	-
p__Ascomycota.c__Sordariomycetes.o__Hypocreales.f__Hypocreaceae.g__Trichoderma		3.9859	0	-
p__Zoopagomycota.c__Zoopagomycetes.o__Zoopagales.f__Sigmoideomycetaceae		3.63575	0	-
p__Ascomycota.c__Eurotiomycetes.o__Onygenales.f__unclassified_o__Onygenales.g__Coccidioides		2.87811	0	-
p__Ascomycota.c__Orbiliomycetes		4.57644	0	-
p__Basidiomycota.c__Agaricomycetes.o__Geastrales.f__Sphaerobolaceae		3.22805	0	-
p__Ascomycota.c__Sordariomycetes.o__Xylariales.f__Xylariaceae		3.64959	0	-
p__Microsporidia.c__unclassified_p__Microsporidia.o__unclassified_p__Microsporidia		3.77865	0	-
p__Basidiomycota.c__Agaricomycetes.o__Agaricales.f__Pleurotaceae.g__Pleurotus		2.7921	0	-
p__Basidiomycota.c__Tremellomycetes		4.47264	0	-
p__Blastocladiomycota.c__Blastocladiomycetes.o__Blastocladiales		3.33616	0	-
p__Ascomycota.c__Sordariomycetes.o__Hypocreales.f__Hypocreaceae		3.9859	0	-
p__Ascomycota.c__Eurotiomycetes.o__Eurotiales.f__Elaphomycetaceae.g__Elaphomyces		3.53496	0	-
p__Ascomycota.c__Dothideomycetes.o__Botryosphaeriales.f__Botryosphaeriaceae		3.79861	0	-
p__Basidiomycota.c__Tremellomycetes.o__Tremellales.f__Cryptococcaceae		3.34388	0	-
p__Basidiomycota.c__Agaricomycetes.o__Agaricales.f__Pterulaceae		3.83278	0	-
p__Blastocladiomycota.c__Blastocladiomycetes		3.33616	0	-
p__Ascomycota.c__Dothideomycetes.o__Lineolatales.f__Lineolataceae.g__Lineolata		2.85449	0	-
p__Ascomycota.c__Dothideomycetes.o__Pleosporales.f__Trematosphaeriaceae		3.39374	0	-
p__Chytridiomycota.c__Chytridiomycetes.o__Chytridiales.f__Chytriomycetaceae		2.97757	0	-
p__Basidiomycota.c__Agaricomycetes.o__Cantharellales.f__Botryobasidiaceae.g__Botryobasidium		3.00305	0	-
p__Basidiomycota.c__Ustilaginomycetes.o__Ustilaginales.f__Ustilaginaceae.g__Moesziomyces		4.09718	0	-
p__Zoopagomycota.c__Dimargaritomycetes.o__Dimargaritales		2.94019	0	-
p__Ascomycota.c__Sordariomycetes.o__Hypocreales.f__Clavicipitaceae.g__Pochonia		3.66831	0	-
p__Chytridiomycota.c__Neocallimastigomycetes		3.94868	0	-
p__Ascomycota.c__Dothideomycetes.o__Aulographales.f__Aulographaceae		3.82325	0	-
p__Ascomycota.c__Leotiomycetes.o__Erysiphales.f__Erysiphaceae.g__Oidium		3.10707	0	-
p__Basidiomycota.c__Agaricomycetes.o__Atheliales.f__Atheliaceae.g__Piloderma		3.24173	0	-
p__Basidiomycota.c__Agaricomycetes.o__Boletales.f__Suillaceae		3.82466	0	-
p__Basidiomycota.c__Agaricomycetes		5.12633	0	-
p__Ascomycota.c__Dothideomycetes.o__Pleosporales.f__Lophiotremataceae.g__Lophiotrema		3.49113	0	-
p__Mucoromycota.c__Mucoromycetes.o__Mucorales.f__Cunninghamellaceae		3.03058	0	-
p__Basidiomycota.c__Agaricomycetes.o__Auriculariales.f__Auriculariaceae.g__Auricularia		2.96819	0	-
p__Ascomycota.c__Sordariomycetes.o__Hypocreales.f__Ophiocordycipitaceae.g__Hirsutella		3.09996	0	-
p__Ascomycota.c__Leotiomycetes.o__Helotiales.f__Sclerotiniaceae.g__Botryotinia		4.01083	0	-
p__Ascomycota.c__Dothideomycetes.o__Eremomycetales		3.296	0	-
p__Ascomycota.c__Sordariomycetes.o__Sordariales.f__Chaetomiaceae.g__Podospora		3.38914	0	-
p__Basidiomycota.c__Agaricomycetes.o__Agaricales.f__Pterulaceae.g__Pterula		3.83278	0	-
p__Ascomycota.c__Sordariomycetes.o__Sordariales.f__Chaetomiaceae.g__Thermothelomyces		3.61008	0	-
p__Basidiomycota.c__Agaricomycetes.o__Agaricales.f__Cortinariaceae.g__Hebeloma		3.39416	0	-
p__Ascomycota.c__Dothideomycetes.o__Phaeotrichales.f__Phaeotrichaceae		3.29368	0	-
p__Basidiomycota.c__Microbotryomycetes.o__Sporidiobolales		3.09996	0	-
p__Ascomycota.c__Dothideomycetes.o__unclassified_c__Dothideomycetes		4.8559	0	-
p__Ascomycota.c__Saccharomycetes.o__Saccharomycetales.f__Trigonopsidaceae		3.6567	0	-
p__Zoopagomycota.c__Harpellomycetes.o__Harpellales.f__Legeriomycetaceae.g__Smittium		3.83687	0	-
p__Basidiomycota.c__Agaricomycetes.o__Agaricales.f__Agaricaceae.g__Leucoagaricus		3.87163	0	-
p__Ascomycota.c__Dothideomycetes.o__Microthyriales.f__Microthyriaceae.g__Microthyrium		3.10251	0	-
p__Mucoromycota.c__Glomeromycetes.o__Diversisporales		4.52666	0	-
p__Ascomycota.c__Leotiomycetes.o__Helotiales.f__Lachnaceae		2.75684	0	-
p__Ascomycota.c__Dothideomycetes.o__Pleosporales.f__Pleosporaceae.g__Pyrenophora		3.72826	0	-
p__Ascomycota.c__Eurotiomycetes.o__Onygenales.f__Ajellomycetaceae.g__Blastomyces		3.05195	0	-
p__Basidiomycota.c__Agaricomycetes.o__Auriculariales		3.70506	0	-
p__Zoopagomycota.c__Kickxellomycetes.o__Kickxellales.f__Kickxellaceae.g__Coemansia		3.12996	0	-
p__Chytridiomycota.c__Chytridiomycetes.o__Caulochytriales		2.7921	0	-
p__Basidiomycota.c__Wallemiomycetes.o__Wallemiales.f__Wallemiaceae		3.17914	0	-
p__Ascomycota.c__Saccharomycetes.o__Saccharomycetales.f__Dipodascaceae		3.16517	0	-
p__Ascomycota.c__Sordariomycetes.o__Hypocreales.f__unclassified_o__Hypocreales.g__Acremonium_o__Hypocreales		3.88314	0	-
p__Basidiomycota.c__Agaricomycetes.o__Boletales.f__Suillaceae.g__Suillus		3.82466	0	-
p__Ascomycota.c__Dothideomycetes.o__Capnodiales.f__Piedraiaceae		3.35183	0	-
p__Chytridiomycota		4.51632	0	-
p__Ascomycota.c__Dothideomycetes.o__Patellariales.f__Patellariaceae		3.33619	0	-
p__Cryptomycota.c__unclassified_p__Cryptomycota		3.80033	0	-
p__Ascomycota.c__Dothideomycetes.o__Pleosporales.f__Tetraplosphaeriaceae.g__Polyplosphaeria		3.37519	0	-
p__Basidiomycota.c__Agaricomycetes.o__Agaricales.f__Lyophyllaceae.g__Termitomyces		3.53245	0	-
p__Zoopagomycota.c__Kickxellomycetes.o__Kickxellales.f__Kickxellaceae		3.63289	0	-
p__Ascomycota.c__Dothideomycetes.o__unclassified_c__Dothideomycetes.f__Pseudoperisporiaceae.g__Lizonia		3.91493	0	-
p__Ascomycota.c__Saccharomycetes.o__Saccharomycetales.f__Dipodascaceae.g__Geotrichum		3.16517	0	-
p__Ascomycota.c__Eurotiomycetes.o__Onygenales.f__unclassified_o__Onygenales		2.87811	0	-
p__Ascomycota.c__Saccharomycetes.o__Saccharomycetales.f__Saccharomycetaceae		2.96819	0	-
p__Ascomycota.c__Sordariomycetes.o__Sordariales.f__unclassified_o__Sordariales.g__Madurella		3.5398	0	-
p__Ascomycota.c__Dothideomycetes.o__Pleosporales.f__Diademaceae.g__Clathrospora		3.43716	0	-
p__Basidiomycota.c__Agaricomycetes.o__Russulales		3.74335	0	-
p__Basidiomycota.c__Agaricomycetes.o__Polyporales.f__Steccherinaceae.g__Steccherinum		3.77969	0	-
p__Ascomycota.c__Sordariomycetes.o__Xylariales.f__Sporocadaceae.g__Pestalotiopsis		3.26016	0	-
p__Basidiomycota.c__Pucciniomycetes.o__Pucciniales.f__Melampsoraceae.g__Melampsora		3.66973	0	-
p__Basidiomycota.c__Agaricomycetes.o__Agaricales.f__Omphalotaceae.g__Gymnopus		3.7887	0	-
p__Ascomycota.c__Dothideomycetes.o__Acrospermales.f__Acrospermaceae		3.34739	0	-
p__Basidiomycota.c__Agaricomycetes.o__Cantharellales.f__Ceratobasidiaceae.g__Rhizoctonia		4.07527	0	-
p__Zoopagomycota.c__Basidiobolomycetes.o__Basidiobolales.f__Basidiobolaceae		3.17914	0	-
p__Ascomycota.c__Saccharomycetes.o__Saccharomycetales.f__unclassified_o__Saccharomycetales.g__Diutina		3.00305	0	-
p__Ascomycota.c__Dothideomycetes		5.20324	0	-
p__Ascomycota.c__Dothideomycetes.o__Acrospermales.f__Acrospermaceae.g__Pseudovirgaria		3.34739	0	-
p__Ascomycota.c__Dothideomycetes.o__Microthyriales		3.10251	0	-
p__Basidiomycota.c__Exobasidiomycetes.o__Tilletiales.f__Tilletiaceae		3.56119	0	-
p__Mucoromycota.c__Glomeromycetes.o__Diversisporales.f__Diversisporaceae		4.48392	0	-
p__Ascomycota.c__Eurotiomycetes.o__Verrucariales.f__Verrucariaceae		3.65516	0	-
p__Ascomycota.c__Leotiomycetes.o__Helotiales.f__Dermateaceae.g__Diplocarpon		3.39544	0	-
p__Mucoromycota.c__Mortierellomycetes		3.78424	0	-
p__Basidiomycota.c__Wallemiomycetes.o__Wallemiales.f__Wallemiaceae.g__Wallemia		3.17914	0	-
p__Ascomycota.c__Sordariomycetes.o__Xylariales		4.66843	0	-
p__Ascomycota.c__Leotiomycetes.o__Helotiales		4.85636	0	-
p__Microsporidia.c__unclassified_p__Microsporidia.o__unclassified_p__Microsporidia.f__unclassified_p__Microsporidia.g__Pseudoloma		3.35011	0	-
p__Ascomycota.c__Sordariomycetes.o__Hypocreales.f__Bionectriaceae		3.35523	0	-
p__Basidiomycota.c__Agaricomycetes.o__Atheliales.f__Atheliaceae		3.62875	0	-
p__Basidiomycota.c__Agaricomycetes.o__Russulales.f__Stereaceae.g__Stereum		3.19085	0	-
p__Zoopagomycota.c__Entomophthoromycetes.o__Entomophthorales.f__Ancylistaceae		3.80631	0	-
p__Basidiomycota.c__Dacrymycetes.o__Dacrymycetales		3.43105	0	-
p__Basidiomycota.c__Agaricomycetes.o__Geastrales.f__Sphaerobolaceae.g__Sphaerobolus		3.22805	0	-
p__Ascomycota.c__Leotiomycetes.o__Helotiales.f__Sclerotiniaceae.g__Sclerotinia		4.29674	0	-
p__Ascomycota.c__Eurotiomycetes.o__Eurotiales.f__Aspergillaceae.g__Aspergillus		4.83732	0	-
p__Blastocladiomycota		3.33616	0	-
p__Ascomycota.c__Leotiomycetes.o__unclassified_c__Leotiomycetes.f__Pseudeurotiaceae		4.46797	0	-
p__Zoopagomycota.c__Basidiobolomycetes		3.17914	0	-
p__Ascomycota.c__Leotiomycetes.o__Helotiales.f__unclassified_o__Helotiales.g__Chalara		3.03058	0	-
p__Zoopagomycota.c__Zoopagomycetes.o__Zoopagales		3.8306	0	-
p__Mucoromycota.c__Glomeromycetes.o__Glomerales.f__Glomeraceae.g__Rhizophagus_f__Glomeraceae		4.4122	0	-
p__Basidiomycota.c__Agaricomycetes.o__Agaricales.f__Mycenaceae		3.62315	0	-
p__Basidiomycota.c__Agaricomycetes.o__Hymenochaetales.f__Hymenochaetaceae.g__Fomitiporia		3.34162	0	-
p__Zoopagomycota.c__Zoopagomycetes.o__Zoopagales.f__Piptocephalidaceae.g__Syncephalis		3.34048	0	-
p__Basidiomycota.c__Agaricomycetes.o__Agaricales.f__Physalacriaceae		3.76829	0	-
p__Ascomycota.c__Lecanoromycetes.o__Peltigerales.f__Peltigeraceae.g__Peltigera		2.97757	0	-
p__Ascomycota.c__Dothideomycetes.o__Dothideales.f__Saccotheciaceae		3.55206	0	-
p__Ascomycota.c__Leotiomycetes.o__Helotiales.f__Dermateaceae		4.154	0	-
p__Zoopagomycota.c__Basidiobolomycetes.o__Basidiobolales.f__Basidiobolaceae.g__Basidiobolus		3.17914	0	-
p__Basidiomycota.c__Agaricomycetes.o__Agaricales.f__Schizophyllaceae.g__Auriculariopsis		3.17914	0	-
p__Basidiomycota.c__Agaricomycetes.o__Agaricales.f__Marasmiaceae.g__Moniliophthora		3.8611	0	-
p__Ascomycota.c__Leotiomycetes.o__unclassified_c__Leotiomycetes.f__Pseudeurotiaceae.g__Pseudogymnoascus		4.46797	0	-
p__Ascomycota.c__Dothideomycetes.o__Pleosporales.f__unclassified_o__Pleosporales		3.40541	0	-
p__Cryptomycota		3.80033	0	-
p__Basidiomycota.c__Exobasidiomycetes.o__Exobasidiales		3.38311	0	-
p__Basidiomycota.c__Agaricomycetes.o__Russulales.f__Stereaceae		3.19085	0	-
p__Basidiomycota.c__Agaricomycetes.o__Polyporales.f__Steccherinaceae		3.79748	0	-
p__Ascomycota.c__Dothideomycetes.o__Mycosphaerellales.f__Mycosphaerellaceae		3.88295	0	-
p__Microsporidia		3.77865	0	-
p__Zoopagomycota.c__Zoopagomycetes.o__Zoopagales.f__Piptocephalidaceae.g__Piptocephalis		3.35298	0	-
p__Ascomycota.c__Sordariomycetes.o__Xylariales.f__Sporocadaceae		3.26016	0	-
p__Basidiomycota.c__Exobasidiomycetes.o__Microstromatales		2.80148	0	-
p__Mucoromycota.c__Endogonomycetes		3.63264	0	-
p__Ascomycota.c__Sordariomycetes.o__Hypocreales.f__Nectriaceae.g__Neonectria		3.36815	0	-
p__Ascomycota.c__Dothideomycetes.o__Pleosporales.f__Periconiaceae.g__Periconia		3.34388	0	-
p__Ascomycota.c__Sordariomycetes.o__Sordariales.f__unclassified_o__Sordariales		3.5398	0	-
p__Zoopagomycota.c__Harpellomycetes		3.83687	0	-
p__Basidiomycota.c__Agaricomycetes.o__Russulales.f__Peniophoraceae.g__Peniophora		3.32212	0	-
p__Ascomycota.c__Dothideomycetes.o__Pleosporales.f__Lophiotremataceae		3.49113	0	-
p__Ascomycota.c__Dothideomycetes.o__unclassified_c__Dothideomycetes.f__unclassified_c__Dothideomycetes.g__Cryomyces		3.47475	0	-
p__Ascomycota.c__Dothideomycetes.o__unclassified_c__Dothideomycetes.f__unclassified_c__Dothideomycetes		3.47475	0	-
p__Basidiomycota.c__Agaricomycetes.o__Polyporales.f__Fomitopsidaceae.g__Fomitopsis		2.44989	0	-
p__Basidiomycota.c__Agaricomycetes.o__Hymenochaetales.f__Schizoporaceae		3.41263	0	-
p__Ascomycota.c__Lecanoromycetes.o__Peltigerales.f__Peltigeraceae		2.97757	0	-
p__Basidiomycota.c__Agaricomycetes.o__Polyporales.f__Grifolaceae.g__Grifola		3.26666	0	-
p__Basidiomycota.c__Agaricomycetes.o__Agaricales.f__Marasmiaceae		3.8611	0	-
p__Cryptomycota.c__unclassified_p__Cryptomycota.o__unclassified_p__Cryptomycota		3.80033	0	-
p__Ascomycota.c__Dothideomycetes.o__Eremomycetales.f__Eremomycetaceae		3.296	0	-
p__Chytridiomycota.c__Neocallimastigomycetes.o__Neocallimastigales.f__Neocallimastigaceae.g__Piromyces		3.72899	0	-
p__Basidiomycota.c__Tremellomycetes.o__Trichosporonales		3.41544	0	-
p__Basidiomycota.c__Malasseziomycetes		3.70483	0	-
p__Basidiomycota.c__Ustilaginomycetes.o__Ustilaginales.f__Ustilaginaceae.g__Ustilago		3.50021	0	-
p__Ascomycota.c__Dothideomycetes.o__Aulographales.f__Aulographaceae.g__Aulographum		3.82325	0	-
p__Ascomycota.c__Dothideomycetes.o__Mytilinidiales.f__Mytilinidiaceae		3.67622	0	-
p__Mucoromycota.c__Glomeromycetes.o__Glomerales.f__Glomeraceae.g__Glomus		3.51011	0	-
p__Basidiomycota.c__Agaricomycetes.o__Agaricales.f__Strophariaceae		3.58914	0	-
p__Ascomycota.c__Dothideomycetes.o__Pleosporales.f__Diademaceae		3.43716	0	-
p__Ascomycota.c__Neolectomycetes.o__Neolectales.f__Neolectaceae		3.24609	0	-
p__Basidiomycota.c__Wallemiomycetes.o__Wallemiales		3.17914	0	-
p__Ascomycota.c__Dothideomycetes.o__unclassified_c__Dothideomycetes.f__Zopfiaceae.g__Zopfia		4.57652	0	-
p__Chytridiomycota.c__Neocallimastigomycetes.o__Neocallimastigales.f__Neocallimastigaceae.g__Neocallimastix		3.82896	0	-
p__Ascomycota.c__Dothideomycetes.o__Phaeotrichales.f__Phaeotrichaceae.g__Trichodelitschia		3.29368	0	-
p__Basidiomycota.c__Agaricomycetes.o__Agaricales.f__Amanitaceae		3.336	0	-
p__Basidiomycota.c__Agaricomycetes.o__Cantharellales.f__Botryobasidiaceae		3.00305	0	-
p__Ascomycota.c__Leotiomycetes.o__Helotiales.f__Leotiaceae.g__Pezoloma		3.08076	0	-
p__Ascomycota.c__Sordariomycetes.o__Diaporthales		3.76665	0	-
p__Basidiomycota.c__Agaricomycetes.o__Agaricales.f__Tricholomataceae.g__Laccaria		3.87944	0	-
p__Ascomycota.c__Dothideomycetes.o__unclassified_c__Dothideomycetes.f__Gloniaceae		4.60975	0	-
p__Ascomycota.c__Saccharomycetes.o__Saccharomycetales.f__Phaffomycetaceae		3.09996	0	-
p__Basidiomycota.c__Exobasidiomycetes.o__Entylomatales.f__unclassified_o__Entylomatales		3.34378	0	-
p__Basidiomycota.c__Agaricomycetes.o__Polyporales.f__Laetiporaceae		3.35759	0	-
p__Ascomycota.c__Dothideomycetes.o__Cladosporiales.f__Cladosporiaceae		3.57895	0	-
p__Basidiomycota.c__Agaricomycetes.o__Polyporales.f__Dacryobolaceae.g__Postia		3.24221	0	-
p__Zoopagomycota.c__Harpellomycetes.o__Harpellales.f__Harpellaceae		3.18522	0	-
p__Ascomycota.c__Dothideomycetes.o__Aulographales.f__Rhizodiscinaceae		2.70202	0	-
p__Ascomycota.c__Schizosaccharomycetes.o__Schizosaccharomycetales		3.28193	0	-
p__Basidiomycota.c__Agaricomycetes.o__Agaricales.f__Pleurotaceae		2.7921	0	-
p__Ascomycota.c__Dothideomycetes.o__Venturiales.f__Venturiaceae		3.93815	0	-
p__Basidiomycota.c__Agaricomycetes.o__Russulales.f__Bondarzewiaceae.g__Bondarzewia		3.56488	0	-
p__Ascomycota.c__Sordariomycetes.o__Ophiostomatales.f__Ophiostomataceae.g__Sporothrix		3.53384	0	-
p__Zoopagomycota.c__Harpellomycetes.o__Harpellales		3.83687	0	-
p__Blastocladiomycota.c__Blastocladiomycetes.o__Blastocladiales.f__Catenariaceae.g__Catenaria		3.33616	0	-
p__Basidiomycota.c__Dacrymycetes.o__Dacrymycetales.f__Dacrymycetaceae		3.43105	0	-
p__Chytridiomycota.c__Chytridiomycetes.o__Synchytriales.f__Synchytriaceae.g__Synchytrium		3.99991	0	-
p__Basidiomycota.c__Agaricomycetes.o__Agaricales.f__Psathyrellaceae.g__Coprinellus		2.98213	0	-
p__Ascomycota.c__Dothideomycetes.o__Pleosporales.f__Massarinaceae.g__Byssothecium		2.70202	0	-
p__Ascomycota.c__Sordariomycetes.o__Diaporthales.f__Diaporthaceae.g__Diaporthe		3.23396	0	-
p__Ascomycota.c__Eurotiomycetes.o__Eurotiales.f__Thermoascaceae		3.722	0	-
p__Basidiomycota.c__Agaricomycetes.o__Agaricales.f__Schizophyllaceae		3.30091	0	-
p__Ascomycota.c__Eurotiomycetes.o__Onygenales		4.30272	0	-
p__Zoopagomycota.c__Zoopagomycetes.o__Zoopagales.f__Piptocephalidaceae		3.64781	0	-
p__Ascomycota.c__Sordariomycetes.o__Ophiostomatales		3.53384	0	-
p__Ascomycota.c__Saccharomycetes.o__Saccharomycetales.f__Phaffomycetaceae.g__Wickerhamomyces		3.09996	0	-
p__Ascomycota.c__Sordariomycetes.o__Diaporthales.f__Valsaceae		3.76665	0	-
p__Ascomycota.c__Sordariomycetes.o__Hypocreales.f__Bionectriaceae.g__Geosmithia		3.17914	0	-

## Sheet: Fungi
Supplementary Table S3. (b) Discriminant result of LEfSE of soil fungi.
Species name	Treatment	Mean	LDA_value	Pvalue
p__Ascomycota.c__Leotiomycetes	PSBC	5.07976	4.43007	0.0273237
p__Ascomycota.c__Leotiomycetes.o__Helotiales.f__Sclerotiniaceae	PSBC	4.56207	4.00121	0.0389902
p__Basidiomycota.c__Agaricomycetes.o__Polyporales.f__Polyporaceae	CK	4.16889	3.8362	0.0379415
p__Basidiomycota.c__Agaricomycetes.o__Corticiales	PSBC	4.1975	3.81746	0.0273237
p__Basidiomycota.c__Agaricomycetes.o__Polyporales	CK	4.49156	3.80977	0.0273237
p__Basidiomycota.c__Agaricomycetes.o__Corticiales.f__Punctulariaceae.g__Punctularia	PSBC	4.1975	3.79731	0.0273237
p__Basidiomycota.c__Agaricomycetes.o__Corticiales.f__Punctulariaceae	PSBC	4.1975	3.78919	0.0273237
p__Ascomycota.c__Eurotiomycetes.o__Onygenales.f__Ascosphaeraceae	PBC	3.99885	3.73488	0.0459381
p__Ascomycota.c__Eurotiomycetes.o__Onygenales.f__Ascosphaeraceae.g__Ascosphaera	PBC	3.99885	3.70788	0.0459381
p__Ascomycota.c__Sordariomycetes.o__Xylariales.f__Xylariaceae.g__Xylaria	PSBC	3.64959	3.53035	0.0347353
p__Mucoromycota.c__Mucoromycetes.o__Mucorales.f__Choanephoraceae	CK	3.69234	3.45454	0.0459381
p__Mucoromycota.c__Mucoromycetes.o__Mucorales.f__Choanephoraceae.g__Choanephora	CK	3.69234	3.4513	0.0459381
p__Ascomycota.c__Dothideomycetes.o__Capnodiales.f__Capnodiaceae.g__Polychaeton	PSBC	3.48711	3.43406	0.0347353
p__Ascomycota.c__Dothideomycetes.o__Capnodiales.f__Capnodiaceae	PSBC	3.48711	3.42792	0.0347353
p__Ascomycota.c__Pezizomycetes.o__Pezizales.f__Pyronemataceae	PBC	3.53729	3.41824	0.0265095
p__Ascomycota.c__Leotiomycetes.o__Helotiales.f__Chlorociboriaceae.g__Chlorociboria	CK	3.22702	3.35131	0.0339856
p__Ascomycota.c__Leotiomycetes.o__Helotiales.f__Chlorociboriaceae	CK	3.22702	3.33306	0.0339856
p__Basidiomycota.c__Agaricomycetes.o__Polyporales.f__Polyporaceae.g__Dichomitus	PSBC	3.45383	3.30722	0.0347353
p__Microsporidia.c__unclassified_p__Microsporidia.o__unclassified_p__Microsporidia.f__Dubosqiidae	PBC	3.38992	3.26339	0.0347353
p__Mucoromycota.c__Glomeromycetes.o__Diversisporales.f__Gigasporaceae.g__Gigaspora	CK	3.49852	3.25529	0.0459381
p__Microsporidia.c__unclassified_p__Microsporidia.o__unclassified_p__Microsporidia.f__Dubosqiidae.g__Hamiltosporidium	PBC	3.38992	3.25015	0.0347353
p__Mucoromycota.c__Glomeromycetes.o__Diversisporales.f__Gigasporaceae	CK	3.49852	3.21923	0.0459381
p__Ascomycota.c__Sordariomycetes.o__Xylariales.f__Pseudomassariaceae.g__Pseudomassariella	PSBC	3.24365	3.20393	0.0459381
p__Ascomycota.c__Sordariomycetes.o__Xylariales.f__Pseudomassariaceae	PSBC	3.24365	3.19146	0.0459381
p__Ascomycota.c__Pezizomycetes.o__Pezizales.f__Ascobolaceae		2.97757	0	-
p__Ascomycota.c__Pezizomycetes.o__Pezizales		4.06131	0	-
p__Ascomycota.c__Sordariomycetes.o__Ophiostomatales.f__Ophiostomataceae		3.53384	0	-
p__Basidiomycota.c__Agaricomycetes.o__Auriculariales.f__Exidiaceae		3.70506	0	-
p__Ascomycota.c__Dothideomycetes.o__Venturiales.f__Cylindrosympodiaceae		3.87394	0	-
p__Ascomycota.c__unclassified_p__Ascomycota.o__unclassified_p__Ascomycota.f__unclassified_p__Ascomycota.g__Saitoella		3.23418	0	-
p__Chytridiomycota.c__Chytridiomycetes.o__Chytridiales.f__Chytriomycetaceae.g__Rhizoclosmatium		2.97757	0	-
p__Mucoromycota.c__Mucoromycetes.o__Mucorales.f__Cunninghamellaceae.g__Absidia		3.03058	0	-
p__Ascomycota.c__Dothideomycetes.o__Patellariales.f__Patellariaceae.g__Patellaria		3.33619	0	-
p__Mucoromycota.c__Endogonomycetes.o__Endogonales.f__unclassified_o__Endogonales.g__Bifiguratus		3.52402	0	-
p__Ascomycota.c__Sordariomycetes.o__Sordariales		4.21738	0	-
p__Chytridiomycota.c__Chytridiomycetes.o__Spizellomycetales.f__Spizellomycetaceae.g__Spizellomyces		3.91113	0	-
p__Ascomycota.c__Sordariomycetes.o__Coniochaetales.f__Coniochaetaceae.g__Coniochaeta		3.69316	0	-
p__Basidiomycota.c__Exobasidiomycetes.o__Tilletiales		3.56119	0	-
p__Ascomycota.c__Sordariomycetes.o__Coniochaetales.f__Coniochaetaceae		3.69316	0	-
p__Basidiomycota.c__Agaricomycetes.o__Hymenochaetales.f__Hymenochaetaceae.g__Sanghuangporus		3.396	0	-
p__Basidiomycota.c__Exobasidiomycetes.o__Microstromatales.f__unclassified_o__Microstromatales		2.80148	0	-
p__Chytridiomycota.c__Chytridiomycetes		4.28687	0	-
p__Basidiomycota.c__Wallemiomycetes		3.17914	0	-
p__Ascomycota.c__Sordariomycetes.o__Hypocreales.f__Ophiocordycipitaceae		4.33966	0	-
p__Chytridiomycota.c__Neocallimastigomycetes.o__Neocallimastigales.f__Neocallimastigaceae		3.94868	0	-
p__Mucoromycota.c__Glomeromycetes		4.78876	0	-
p__Ascomycota.c__Sordariomycetes.o__Xylariales.f__Diatrypaceae.g__Eutypa		2.45581	0	-
p__Basidiomycota.c__Pucciniomycetes.o__Pucciniales		4.07926	0	-
p__Ascomycota.c__Sordariomycetes.o__Xylariales.f__unclassified_o__Xylariales		4.63333	0	-
p__Basidiomycota.c__Agaricomycetes.o__Trechisporales		3.6018	0	-
p__Ascomycota.c__Dothideomycetes.o__Pleosporales.f__Didymellaceae		4.02198	0	-
p__Basidiomycota.c__Microbotryomycetes.o__Sporidiobolales.f__Sporidiobolaceae		3.09996	0	-
p__Ascomycota.c__Eurotiomycetes.o__Chaetothyriales.f__Herpotrichiellaceae.g__Rhinocladiella		3.05195	0	-
p__Ascomycota.c__Schizosaccharomycetes.o__Schizosaccharomycetales.f__Schizosaccharomycetaceae		3.28193	0	-
p__Basidiomycota.c__Exobasidiomycetes.o__Microstromatales.f__unclassified_o__Microstromatales.g__Pseudomicrostroma		2.80148	0	-
p__Ascomycota.c__Pezizomycetes.o__Pezizales.f__Morchellaceae.g__Morchella		3.51258	0	-
p__Ascomycota.c__Eurotiomycetes.o__Eurotiales.f__Aspergillaceae.g__Penicilliopsis		3.77658	0	-
p__Ascomycota.c__Saccharomycetes.o__Saccharomycetales.f__Lipomycetaceae		4.30804	0	-
p__Ascomycota.c__Leotiomycetes.o__Helotiales.f__Rutstroemiaceae		2.50543	0	-
p__Ascomycota.c__Neolectomycetes.o__Neolectales.f__Neolectaceae.g__Neolecta		3.24609	0	-
p__Ascomycota.c__Dothideomycetes.o__Pleosporales.f__Pleosporaceae.g__Bipolaris		3.66747	0	-
p__Ascomycota.c__Sordariomycetes.o__Magnaporthales.f__Magnaporthaceae.g__Magnaporthiopsis		3.09996	0	-
p__Chytridiomycota.c__Neocallimastigomycetes.o__Neocallimastigales.f__Neocallimastigaceae.g__Anaeromyces		3.45655	0	-
p__Ascomycota.c__Dothideomycetes.o__Pleosporales.f__Sporormiaceae.g__Westerdykella		3.48625	0	-
p__Ascomycota.c__Neolectomycetes.o__Neolectales		3.24609	0	-
p__Ascomycota.c__Dothideomycetes.o__Dothideales.f__Saccotheciaceae.g__Aureobasidium		3.55206	0	-
p__Ascomycota.c__Dothideomycetes.o__Mycosphaerellales		4.19345	0	-
p__Ascomycota.c__Orbiliomycetes.o__Orbiliales.f__Orbiliaceae.g__Drechslerella		3.53924	0	-
p__Basidiomycota.c__Agaricomycetes.o__Gloeophyllales.f__Gloeophyllaceae		3.33528	0	-
p__Ascomycota.c__Eurotiomycetes.o__Onygenales.f__Ajellomycetaceae.g__Histoplasma		3.8138	0	-
p__Zoopagomycota.c__Kickxellomycetes		3.63289	0	-
p__Basidiomycota.c__Agaricomycetes.o__Agaricales.f__Cortinariaceae		3.39416	0	-
p__Ascomycota.c__Leotiomycetes.o__unclassified_c__Leotiomycetes.f__Myxotrichaceae		3.88563	0	-
p__Basidiomycota.c__Exobasidiomycetes.o__Georgefischeriales		3.4713	0	-
p__Ascomycota.c__Dothideomycetes.o__unclassified_c__Dothideomycetes.f__Gloniaceae.g__Glonium		4.16316	0	-
p__Ascomycota.c__Sordariomycetes.o__Hypocreales.f__Cordycipitaceae.g__Cordyceps		3.93385	0	-
p__Ascomycota.c__Dothideomycetes.o__Mytilinidiales.f__Mytilinidiaceae.g__Lophium		3.4522	0	-
p__Ascomycota.c__Sordariomycetes.o__Hypocreales.f__Ophiocordycipitaceae.g__Purpureocillium		3.65663	0	-
p__Basidiomycota.c__Agaricomycetes.o__Polyporales.f__Dacryobolaceae		3.24221	0	-
p__Ascomycota.c__Leotiomycetes.o__Helotiales.f__unclassified_o__Helotiales.g__Cadophora		3.69031	0	-
p__Basidiomycota.c__Agaricomycetes.o__Sebacinales.f__Serendipitaceae.g__Serendipita		4.31949	0	-
p__Ascomycota.c__Saccharomycetes.o__Saccharomycetales.f__Saccharomycetaceae.g__Kluyveromyces		2.96819	0	-
p__Zoopagomycota.c__Zoopagomycetes		3.8306	0	-
p__Ascomycota.c__Eurotiomycetes.o__Chaetothyriales.f__unclassified_o__Chaetothyriales		3.49269	0	-
p__Ascomycota.c__Dothideomycetes.o__Venturiales.f__Cylindrosympodiaceae.g__Tothia		3.87394	0	-
p__Ascomycota.c__Eurotiomycetes.o__Eurotiales.f__Trichocomaceae.g__Talaromyces		4.11016	0	-
p__Ascomycota.c__Saccharomycetes.o__Saccharomycetales.f__unclassified_o__Saccharomycetales		3.00305	0	-
p__Mucoromycota.c__Glomeromycetes.o__Glomerales.f__Glomeraceae		4.44496	0	-
p__Basidiomycota.c__Agaricomycetes.o__Agaricales.f__Psathyrellaceae		3.48146	0	-
p__Basidiomycota.c__Exobasidiomycetes.o__Exobasidiales.f__Cryptobasidiaceae.g__Acaromyces		3.38311	0	-
p__Ascomycota.c__Sordariomycetes.o__Xylariales.f__Xylariaceae.g__Rosellinia		2.87811	0	-
p__Ascomycota.c__Dothideomycetes.o__unclassified_c__Dothideomycetes.f__Pseudoperisporiaceae		3.91493	0	-
p__Ascomycota.c__Leotiomycetes.o__Helotiales.f__Mollisiaceae.g__Phialocephala_f__Mollisiaceae		4.17797	0	-
p__Ascomycota.c__Eurotiomycetes.o__Eurotiales.f__Trichocomaceae		4.11016	0	-
p__Microsporidia.c__unclassified_p__Microsporidia		3.77865	0	-
p__Ascomycota.c__Lecanoromycetes.o__Umbilicariales.f__Umbilicariaceae.g__Lasallia		4.4612	0	-
p__Mucoromycota.c__Mucoromycetes.o__Mucorales.f__Rhizopodaceae		3.69125	0	-
p__Ascomycota.c__Leotiomycetes.o__Helotiales.f__Leotiaceae		3.08076	0	-
p__Ascomycota.c__Eurotiomycetes.o__Chaetothyriales.f__Herpotrichiellaceae.g__Capronia		2.40099	0	-
p__Basidiomycota.c__Tremellomycetes.o__Trichosporonales.f__Trichosporonaceae.g__Vanrija		3.26666	0	-
p__Ascomycota.c__Pezizomycetes.o__Pezizales.f__Pyronemataceae.g__Sphaerosporella		3.34911	0	-
p__Basidiomycota.c__Agaricomycetes.o__Cantharellales.f__Ceratobasidiaceae		4.17446	0	-
p__Ascomycota.c__Sordariomycetes.o__Hypocreales.f__Clavicipitaceae		4.23457	0	-
p__Basidiomycota.c__Agaricomycetes.o__Boletales.f__Coniophoraceae.g__Coniophora		3.79993	0	-
p__Ascomycota.c__Eurotiomycetes.o__Chaetothyriales.f__Herpotrichiellaceae.g__Exophiala		3.69175	0	-
p__Basidiomycota.c__Agaricomycetes.o__Amylocorticiales.f__Amylocorticiaceae.g__Plicaturopsis		3.38245	0	-
p__Ascomycota.c__Sordariomycetes.o__Sordariales.f__Chaetomiaceae.g__Chaetomium		3.90835	0	-
p__Chytridiomycota.c__Chytridiomycetes.o__Spizellomycetales		3.91113	0	-
p__Mucoromycota.c__Mucoromycetes.o__Mucorales.f__Mucoraceae.g__Mucor		4.61611	0	-
p__Mucoromycota.c__Endogonomycetes.o__Endogonales.f__Endogonaceae.g__Jimgerdemannia		2.97757	0	-
p__Ascomycota.c__Sordariomycetes.o__Hypocreales.f__Ophiocordycipitaceae.g__Drechmeria		3.68504	0	-
p__Basidiomycota.c__Pucciniomycetes		4.07926	0	-
p__Ascomycota.c__Dothideomycetes.o__Mycosphaerellales.f__Mycosphaerellaceae.g__Zymoseptoria		3.78353	0	-
p__Ascomycota.c__Neolectomycetes		3.24609	0	-
p__Ascomycota.c__Saccharomycetes.o__Saccharomycetales.f__Debaryomycetaceae		3.51709	0	-
p__Ascomycota.c__Leotiomycetes.o__unclassified_c__Leotiomycetes		4.59692	0	-
p__Ascomycota.c__Dothideomycetes.o__Botryosphaeriales.f__Botryosphaeriaceae.g__Macrophomina		2.92702	0	-
p__Basidiomycota.c__Agaricomycetes.o__Hymenochaetales		3.77032	0	-
p__Microsporidia.c__unclassified_p__Microsporidia.o__unclassified_p__Microsporidia.f__unclassified_p__Microsporidia		3.75779	0	-
p__Ascomycota.c__Pezizomycetes.o__Pezizales.f__Tuberaceae.g__Tuber		3.72291	0	-
p__Ascomycota.c__Dothideomycetes.o__Pleosporales.f__Lindgomycetaceae.g__Lindgomyces		3.53058	0	-
p__Ascomycota.c__Leotiomycetes.o__Helotiales.f__Pleuroascaceae.g__Venustampulla		2.98213	0	-
p__Ascomycota.c__Schizosaccharomycetes.o__Schizosaccharomycetales.f__Schizosaccharomycetaceae.g__Schizosaccharomyces		3.28193	0	-
p__Ascomycota.c__Leotiomycetes.o__Erysiphales.f__Erysiphaceae.g__Erysiphe		3.87568	0	-
p__Basidiomycota.c__Agaricomycetes.o__Cantharellales.f__Tulasnellaceae		3.81718	0	-
p__Ascomycota.c__Sordariomycetes.o__Microascales.f__Microascaceae.g__Scedosporium		2.50543	0	-
p__Zoopagomycota		4.34798	0	-
p__Ascomycota.c__Eurotiomycetes.o__Eurotiales.f__Aspergillaceae		5.03179	0	-
p__Mucoromycota.c__Glomeromycetes.o__Glomerales		4.44496	0	-
p__Ascomycota.c__Dothideomycetes.o__Mytilinidiales		3.67622	0	-
p__Basidiomycota.c__Agaricomycetes.o__Agaricales.f__Schizophyllaceae.g__Schizophyllum		3.30091	0	-
p__Ascomycota.c__Sordariomycetes.o__Microascales		2.87795	0	-
p__Mucoromycota.c__Mortierellomycetes.o__Mortierellales		3.78424	0	-
p__Ascomycota.c__unclassified_p__Ascomycota.o__unclassified_p__Ascomycota		3.23418	0	-
p__Ascomycota.c__Dothideomycetes.o__Pleosporales.f__Sporormiaceae		3.48625	0	-
p__Basidiomycota.c__Agaricomycetes.o__Auriculariales.f__Auriculariaceae		2.96819	0	-
p__Basidiomycota.c__Dacrymycetes.o__Dacrymycetales.f__Dacrymycetaceae.g__Calocera		3.43105	0	-
p__Basidiomycota.c__Agaricomycetes.o__Trechisporales.f__Hydnodontaceae.g__Sistotremastrum		3.6018	0	-
p__Ascomycota.c__Dothideomycetes.o__Pleosporales.f__Pleosporaceae		4.14015	0	-
p__Zoopagomycota.c__Entomophthoromycetes.o__Entomophthorales		3.80631	0	-
p__Chytridiomycota.c__Monoblepharidomycetes.o__Monoblepharidales		3.74627	0	-
p__Zoopagomycota.c__Kickxellomycetes.o__Kickxellales		3.63289	0	-
p__Ascomycota.c__Dothideomycetes.o__unclassified_c__Dothideomycetes.f__Zopfiaceae		4.57652	0	-
p__Ascomycota.c__Leotiomycetes.o__Helotiales.f__Lachnaceae.g__Lachnellula		2.75684	0	-
p__Basidiomycota.c__Agaricomycetes.o__Polyporales.f__Gelatoporiaceae.g__Obba_f__Gelatoporiaceae		3.56016	0	-
p__Ascomycota.c__Dothideomycetes.o__Pleosporales		4.64868	0	-
p__Ascomycota.c__Sordariomycetes.o__Glomerellales.f__Plectosphaerellaceae		3.75739	0	-
p__Basidiomycota.c__Agaricomycetes.o__Hymenochaetales.f__unclassified_o__Hymenochaetales		2.75684	0	-
p__Mucoromycota.c__Endogonomycetes.o__Endogonales.f__unclassified_o__Endogonales		3.52402	0	-
p__Ascomycota.c__Schizosaccharomycetes		3.28193	0	-
p__Ascomycota.c__Dothideomycetes.o__Cladosporiales.f__Cladosporiaceae.g__Cladosporium		3.27425	0	-
p__Ascomycota.c__Sordariomycetes.o__Hypocreales.f__Stachybotryaceae.g__Stachybotrys		3.821	0	-
p__Basidiomycota.c__Ustilaginomycetes.o__Ustilaginales.f__Ustilaginaceae.g__Sporisorium		2.80646	0	-
p__Ascomycota.c__Dothideomycetes.o__Pleosporales.f__Lindgomycetaceae		4.00436	0	-
p__Mucoromycota.c__Mucoromycetes.o__Mucorales.f__Lichtheimiaceae.g__Lichtheimia		3.58563	0	-
p__Ascomycota.c__Saccharomycetes.o__Saccharomycetales.f__Metschnikowiaceae		3.63539	0	-
p__Cryptomycota.c__unclassified_p__Cryptomycota.o__unclassified_p__Cryptomycota.f__unclassified_p__Cryptomycota.g__Paramicrosporidium		3.80033	0	-
p__Basidiomycota.c__Exobasidiomycetes.o__Entylomatales.f__unclassified_o__Entylomatales.g__Tilletiopsis		3.34378	0	-
p__Basidiomycota.c__Agaricomycetes.o__Amylocorticiales		3.38245	0	-
p__Basidiomycota.c__Exobasidiomycetes.o__Georgefischeriales.f__Tilletiariaceae		3.4713	0	-
p__Ascomycota.c__Dothideomycetes.o__Cladosporiales		3.57895	0	-
p__Ascomycota.c__Saccharomycetes.o__Saccharomycetales.f__Saccharomycetaceae.g__Naumovozyma		2.93293	0	-
p__Blastocladiomycota.c__Blastocladiomycetes.o__Blastocladiales.f__Catenariaceae		3.33616	0	-
p__Ascomycota.c__Dothideomycetes.o__unclassified_c__Dothideomycetes.f__Gloniaceae.g__Cenococcum		4.41755	0	-
p__Basidiomycota.c__Agaricomycetes.o__Polyporales.f__Phanerochaetaceae		2.44989	0	-
p__Ascomycota.c__Dothideomycetes.o__Venturiales		4.14501	0	-
p__Ascomycota.c__Saccharomycetes.o__Saccharomycetales.f__Lipomycetaceae.g__Lipomyces		4.30804	0	-
p__Ascomycota.c__Sordariomycetes.o__Microascales.f__Microascaceae		2.87795	0	-
p__Ascomycota.c__Sordariomycetes.o__Magnaporthales.f__Magnaporthaceae.g__Gaeumannomyces		3.05787	0	-
p__Mucoromycota.c__Mucoromycetes.o__Mucorales		4.69539	0	-
p__Ascomycota.c__Dothideomycetes.o__Dothideales		3.55206	0	-
p__Basidiomycota.c__Agaricomycetes.o__Polyporales.f__Gelatoporiaceae		4.09724	0	-
p__Ascomycota.c__Saccharomycetes.o__Saccharomycetales		4.48667	0	-
p__Ascomycota.c__Eurotiomycetes.o__Chaetothyriales.f__Herpotrichiellaceae		4.10308	0	-
p__Ascomycota.c__Leotiomycetes.o__Helotiales.f__Hyaloscyphaceae.g__Hyaloscypha		3.39264	0	-
p__Ascomycota.c__Sordariomycetes.o__Hypocreales.f__Clavicipitaceae.g__Moelleriella		3.50209	0	-
p__Ascomycota.c__Sordariomycetes.o__Glomerellales		4.43635	0	-
p__Ascomycota.c__Dothideomycetes.o__Pleosporales.f__Massarinaceae.g__Massarina		3.22401	0	-
p__Basidiomycota.c__Agaricomycetes.o__Cantharellales.f__Tulasnellaceae.g__Tulasnella		3.81718	0	-
p__Basidiomycota.c__Agaricomycetes.o__Sebacinales		4.31949	0	-
p__Ascomycota.c__Dothideomycetes.o__Phaeotrichales		3.29368	0	-
p__Basidiomycota.c__Agaricomycetes.o__Trechisporales.f__Hydnodontaceae		3.6018	0	-
p__Ascomycota.c__Dothideomycetes.o__Pleosporales.f__unclassified_o__Pleosporales.g__Aaosphaeria		3.40541	0	-
p__Ascomycota.c__Eurotiomycetes.o__Chaetothyriales.f__unclassified_o__Chaetothyriales.g__unclassified_o__Chaetothyriales		3.49269	0	-
p__Basidiomycota.c__Agaricomycetes.o__Boletales.f__Coniophoraceae		3.79993	0	-
p__Ascomycota.c__Leotiomycetes.o__Helotiales.f__unclassified_o__Helotiales		3.76288	0	-
p__Ascomycota.c__Pezizomycetes		4.06131	0	-
p__Ascomycota.c__Orbiliomycetes.o__Orbiliales.f__Orbiliaceae.g__Dactylellina		3.79898	0	-
p__Ascomycota.c__Dothideomycetes.o__Lineolatales		2.85449	0	-
p__Basidiomycota.c__Agaricomycetes.o__Polyporales.f__Phanerochaetaceae.g__Phlebiopsis		2.44989	0	-
p__Mucoromycota.c__Mucoromycetes.o__Mucorales.f__Syncephalastraceae		2.93293	0	-
p__Ascomycota.c__Eurotiomycetes		5.21144	0	-
p__Ascomycota.c__Dothideomycetes.o__Pleosporales.f__Tetraplosphaeriaceae		3.37519	0	-
p__Ascomycota.c__Dothideomycetes.o__Patellariales		3.33619	0	-
p__Basidiomycota		5.27119	0	-
p__Ascomycota.c__Leotiomycetes.o__Helotiales.f__Hyaloscyphaceae		3.39264	0	-
p__Ascomycota.c__Eurotiomycetes.o__Eurotiales.f__Aspergillaceae.g__unclassified_f__Aspergillaceae		3.57985	0	-
p__Basidiomycota.c__Exobasidiomycetes.o__Entylomatales		3.34378	0	-
p__Basidiomycota.c__Tremellomycetes.o__Trichosporonales.f__Trichosporonaceae.g__Trichosporon		2.98255	0	-
p__Ascomycota.c__Sordariomycetes.o__Magnaporthales		3.30091	0	-
p__Ascomycota.c__Dothideomycetes.o__Botryosphaeriales.f__Aplosporellaceae		3.28027	0	-
p__Ascomycota.c__Leotiomycetes.o__Helotiales.f__Pleuroascaceae		2.98213	0	-
p__Basidiomycota.c__Agaricomycetes.o__Russulales.f__Peniophoraceae		3.32212	0	-
p__Chytridiomycota.c__Chytridiomycetes.o__Spizellomycetales.f__Spizellomycetaceae		3.91113	0	-
p__Basidiomycota.c__Tremellomycetes.o__Tremellales		4.4328	0	-
p__Ascomycota.c__Dothideomycetes.o__Pleosporales.f__Pleosporaceae.g__Alternaria		3.56655	0	-
p__Ascomycota.c__Sordariomycetes.o__Hypocreales.f__Stachybotryaceae		3.821	0	-
p__Mucoromycota.c__Mucoromycetes.o__Mucorales.f__Mucoraceae		4.62795	0	-
p__Chytridiomycota.c__Neocallimastigomycetes.o__Neocallimastigales		3.94868	0	-
p__Ascomycota.c__Leotiomycetes.o__Erysiphales		3.944	0	-
p__Basidiomycota.c__Agaricomycetes.o__Sebacinales.f__Serendipitaceae		4.31949	0	-
p__Ascomycota.c__Leotiomycetes.o__Helotiales.f__Sclerotiniaceae.g__Botrytis		3.80792	0	-
p__Ascomycota.c__Dothideomycetes.o__Mycosphaerellales.f__Mycosphaerellaceae.g__Cercospora		3.40414	0	-
p__Basidiomycota.c__Agaricomycetes.o__Polyporales.f__Polyporaceae.g__Trametes		4.02834	0	-
p__Ascomycota.c__Sordariomycetes.o__Glomerellales.f__Glomerellaceae		4.33429	0	-
p__Chytridiomycota.c__Chytridiomycetes.o__Spizellomycetales.f__Powellomycetaceae		2.50045	0	-
p__Ascomycota.c__Dothideomycetes.o__Pleosporales.f__Pleosporaceae.g__Exserohilum		2.49107	0	-
p__Basidiomycota.c__Agaricomycetes.o__Polyporales.f__Grifolaceae		3.26666	0	-
p__Ascomycota.c__Dothideomycetes.o__Pleosporales.f__Periconiaceae		3.34388	0	-
p__Chytridiomycota.c__Chytridiomycetes.o__Synchytriales.f__Synchytriaceae		3.99991	0	-
p__Ascomycota.c__Dothideomycetes.o__Microthyriales.f__Microthyriaceae		3.10251	0	-
p__Basidiomycota.c__Agaricomycetes.o__Geastrales		3.22805	0	-
p__Ascomycota.c__Sordariomycetes.o__Hypocreales.f__Nectriaceae.g__Fusarium		4.59486	0	-
p__Chytridiomycota.c__Monoblepharidomycetes.o__Monoblepharidales.f__Gonapodyaceae		3.74627	0	-
p__Ascomycota.c__Dothideomycetes.o__Mycosphaerellales.f__Teratosphaeriaceae.g__Acidomyces		3.15742	0	-
p__Ascomycota.c__Leotiomycetes.o__Helotiales.f__Mollisiaceae		4.17797	0	-
p__Ascomycota.c__Eurotiomycetes.o__Onygenales.f__Ajellomycetaceae		3.86143	0	-
p__Basidiomycota.c__Agaricomycetes.o__Agaricales.f__Lyophyllaceae		3.53245	0	-
p__Ascomycota.c__Sordariomycetes.o__Hypocreales.f__Nectriaceae		4.61517	0	-
p__Ascomycota.c__Eurotiomycetes.o__Chaetothyriales		4.17825	0	-
p__Basidiomycota.c__Agaricomycetes.o__Atheliales		3.62875	0	-
p__Mucoromycota.c__Mortierellomycetes.o__Mortierellales.f__Mortierellaceae.g__Mortierella		3.78424	0	-
p__Ascomycota.c__Sordariomycetes.o__Diaporthales.f__Diaporthaceae		3.23396	0	-
p__Basidiomycota.c__Microbotryomycetes.o__Sporidiobolales.f__Sporidiobolaceae.g__Rhodotorula		3.09996	0	-
p__Ascomycota.c__Dothideomycetes.o__Botryosphaeriales		3.91361	0	-
p__Ascomycota.c__Sordariomycetes.o__Hypocreales.f__unclassified_o__Hypocreales		3.88314	0	-
p__Ascomycota.c__Eurotiomycetes.o__Eurotiales		5.0981	0	-
p__Ascomycota.c__Dothideomycetes.o__Mycosphaerellales.f__Teratosphaeriaceae.g__Hortaea		3.88869	0	-
p__Basidiomycota.c__Agaricomycetes.o__Polyporales.f__Polyporaceae.g__Ganoderma		3.61054	0	-
p__Ascomycota.c__Eurotiomycetes.o__Verrucariales		3.65516	0	-
p__Ascomycota.c__Leotiomycetes.o__Erysiphales.f__Erysiphaceae		3.944	0	-
p__Basidiomycota.c__Dacrymycetes		3.43105	0	-
p__Basidiomycota.c__Agaricomycetes.o__Agaricales.f__Physalacriaceae.g__Cylindrobasidium		3.17898	0	-
p__Basidiomycota.c__Agaricomycetes.o__Agaricales.f__Psathyrellaceae.g__Coprinopsis		3.46207	0	-
p__Chytridiomycota.c__Chytridiomycetes.o__Spizellomycetales.f__Powellomycetaceae.g__Powellomyces		2.50045	0	-
p__Ascomycota.c__Dothideomycetes.o__Mycosphaerellales.f__Teratosphaeriaceae.g__Neohortaea		2.44989	0	-
p__Basidiomycota.c__Tremellomycetes.o__Tremellales.f__Trimorphomycetaceae		4.34944	0	-
p__Ascomycota.c__Dothideomycetes.o__Pleosporales.f__Leptosphaeriaceae.g__Leptosphaeria		2.70202	0	-
p__Ascomycota.c__Lecanoromycetes.o__Umbilicariales.f__Umbilicariaceae		4.4612	0	-
p__Ascomycota.c__Pezizomycetes.o__Pezizales.f__Ascobolaceae.g__Ascobolus		2.97757	0	-
p__Basidiomycota.c__Agaricomycetes.o__Cantharellales		4.29865	0	-
p__Basidiomycota.c__Agaricomycetes.o__Agaricales.f__Strophariaceae.g__Psilocybe		2.87811	0	-
p__Basidiomycota.c__Tremellomycetes.o__Tremellales.f__Trimorphomycetaceae.g__Saitozyma		4.34944	0	-
p__Mucoromycota		5.06185	0	-
p__Chytridiomycota.c__Monoblepharidomycetes.o__Monoblepharidales.f__Gonapodyaceae.g__Gonapodya		3.74627	0	-
p__Ascomycota.c__Dothideomycetes.o__Pleosporales.f__Leptosphaeriaceae		3.62309	0	-
p__Ascomycota.c__Saccharomycetes.o__Saccharomycetales.f__Debaryomycetaceae.g__Candida_f__Debaryomycetaceae		3.51709	0	-
p__Basidiomycota.c__Exobasidiomycetes.o__Exobasidiales.f__Cryptobasidiaceae		3.38311	0	-
p__Basidiomycota.c__Agaricomycetes.o__Agaricales		4.7252	0	-
p__Mucoromycota.c__Mortierellomycetes.o__Mortierellales.f__Mortierellaceae		3.78424	0	-
p__Ascomycota.c__Eurotiomycetes.o__Eurotiales.f__Thermoascaceae.g__Byssochlamys		3.722	0	-
p__Basidiomycota.c__Agaricomycetes.o__Agaricales.f__Omphalotaceae.g__Lentinula		3.2713	0	-
p__Ascomycota		5.83617	0	-
p__Ascomycota.c__Leotiomycetes.o__unclassified_c__Leotiomycetes.f__unclassified_c__Leotiomycetes		3.5955	0	-
p__Ascomycota.c__Sordariomycetes.o__Hypocreales.f__Bionectriaceae.g__Gliomastix		2.87811	0	-
p__Basidiomycota.c__Tremellomycetes.o__Tremellales.f__Tremellaceae.g__Tremella		3.40199	0	-
p__Ascomycota.c__Saccharomycetes.o__Saccharomycetales.f__Metschnikowiaceae.g__Clavispora		3.63539	0	-
p__Ascomycota.c__Sordariomycetes.o__Hypocreales.f__Cordycipitaceae		4.07688	0	-
p__Ascomycota.c__Dothideomycetes.o__Pleosporales.f__Didymellaceae.g__Didymella		3.41544	0	-
p__Basidiomycota.c__Agaricomycetes.o__Hymenochaetales.f__unclassified_o__Hymenochaetales.g__Rickenella		2.75684	0	-
p__Basidiomycota.c__Malasseziomycetes.o__Malasseziales.f__Malasseziaceae		3.70483	0	-
p__Basidiomycota.c__Microbotryomycetes		3.09996	0	-
p__Ascomycota.c__Dothideomycetes.o__Mycosphaerellales.f__Teratosphaeriaceae		3.99672	0	-
p__Ascomycota.c__Pezizomycetes.o__Pezizales.f__Pezizaceae.g__Terfezia		3.26422	0	-
p__Ascomycota.c__Dothideomycetes.o__Lineolatales.f__Lineolataceae		2.85449	0	-
p__Basidiomycota.c__Agaricomycetes.o__Gloeophyllales.f__Gloeophyllaceae.g__Gloeophyllum		3.33528	0	-
p__Ascomycota.c__Dothideomycetes.o__Pleosporales.f__Leptosphaeriaceae.g__Ophiobolus		3.62309	0	-
p__Basidiomycota.c__Exobasidiomycetes.o__Tilletiales.f__Tilletiaceae.g__Tilletia		3.56119	0	-
p__Ascomycota.c__Sordariomycetes.o__Magnaporthales.f__Magnaporthaceae		3.30091	0	-
p__Basidiomycota.c__Ustilaginomycetes.o__Ustilaginales.f__Ustilaginaceae		4.22746	0	-
p__Basidiomycota.c__Agaricomycetes.o__Hymenochaetales.f__Hymenochaetaceae		3.69908	0	-
p__Ascomycota.c__Dothideomycetes.o__Pleosporales.f__Massarinaceae		3.22401	0	-
p__Ascomycota.c__Pezizomycetes.o__Pezizales.f__Pyronemataceae.g__Pyronema		3.08339	0	-
p__Basidiomycota.c__Agaricomycetes.o__Amylocorticiales.f__Amylocorticiaceae		3.38245	0	-
p__Ascomycota.c__Orbiliomycetes.o__Orbiliales.f__Orbiliaceae		4.57644	0	-
p__Ascomycota.c__Pezizomycetes.o__Pezizales.f__Morchellaceae		3.51258	0	-
p__Ascomycota.c__Dothideomycetes.o__Botryosphaeriales.f__Botryosphaeriaceae.g__Lasiodiplodia		3.2044	0	-
p__Mucoromycota.c__Endogonomycetes.o__Endogonales		3.63264	0	-
p__Ascomycota.c__Sordariomycetes.o__Microascales.f__Microascaceae.g__Lomentospora		2.87795	0	-
p__Ascomycota.c__Sordariomycetes.o__Hypocreales.f__Clavicipitaceae.g__Metarhizium		4.03056	0	-
p__Ascomycota.c__Leotiomycetes.o__Helotiales.f__Dermateaceae.g__Coleophoma		4.12596	0	-
p__Ascomycota.c__Eurotiomycetes.o__Eurotiales.f__Elaphomycetaceae		3.53496	0	-
p__Basidiomycota.c__Ustilaginomycetes		4.22746	0	-
p__Basidiomycota.c__Tremellomycetes.o__Tremellales.f__Tremellaceae		3.40199	0	-
p__Zoopagomycota.c__Dimargaritomycetes		2.94019	0	-
p__Basidiomycota.c__Agaricomycetes.o__Agaricales.f__Strophariaceae.g__Hypholoma		3.4952	0	-
p__Basidiomycota.c__Agaricomycetes.o__Polyporales.f__Laetiporaceae.g__Laetiporus		3.16151	0	-
p__Ascomycota.c__Dothideomycetes.o__Cladosporiales.f__Cladosporiaceae.g__Rachicladosporium		3.28157	0	-
p__Basidiomycota.c__Agaricomycetes.o__Polyporales.f__Fomitopsidaceae		2.44989	0	-
p__Mucoromycota.c__Mucoromycetes.o__Mucorales.f__Syncephalastraceae.g__Syncephalastrum		2.93293	0	-
p__Basidiomycota.c__Pucciniomycetes.o__Pucciniales.f__Pucciniaceae.g__Puccinia		3.86497	0	-
p__Ascomycota.c__Dothideomycetes.o__Botryosphaeriales.f__Botryosphaeriaceae.g__Botryosphaeria		3.68234	0	-
p__Ascomycota.c__Eurotiomycetes.o__Chaetothyriales.f__Herpotrichiellaceae.g__Fonsecaea		3.82774	0	-
p__Basidiomycota.c__Agaricomycetes.o__Atheliales.f__Atheliaceae.g__Fibularhizoctonia		3.59823	0	-
p__Zoopagomycota.c__Zoopagomycetes.o__Zoopagales.f__Sigmoideomycetaceae.g__Thamnocephalis		3.63575	0	-
p__Ascomycota.c__Dothideomycetes.o__Venturiales.f__Venturiaceae.g__Venturia_f__Venturiaceae		3.93815	0	-
p__Ascomycota.c__Dothideomycetes.o__Pleosporales.f__Didymellaceae.g__Ascochyta		3.95465	0	-
p__Basidiomycota.c__Agaricomycetes.o__Agaricales.f__Agaricaceae		3.87163	0	-
p__Basidiomycota.c__Ustilaginomycetes.o__Ustilaginales		4.22746	0	-
p__Ascomycota.c__Sordariomycetes.o__Coniochaetales		3.69316	0	-
p__Chytridiomycota.c__Monoblepharidomycetes		3.74627	0	-
p__Ascomycota.c__Eurotiomycetes.o__Eurotiales.f__Aspergillaceae.g__Monascus_f__Aspergillaceae		3.09996	0	-
p__Basidiomycota.c__Pucciniomycetes.o__Pucciniales.f__Melampsoraceae		3.66973	0	-
p__Ascomycota.c__Eurotiomycetes.o__Chaetothyriales.f__Herpotrichiellaceae.g__Cladophialophora		3.51494	0	-
p__Ascomycota.c__Sordariomycetes.o__Hypocreales.f__Ophiocordycipitaceae.g__Ophiocordyceps		3.97251	0	-
p__Ascomycota.c__Eurotiomycetes.o__Eurotiales.f__Aspergillaceae.g__Penicillium		4.52578	0	-
p__Basidiomycota.c__Agaricomycetes.o__Agaricales.f__Mycenaceae.g__Mycena		3.62315	0	-
p__Cryptomycota.c__unclassified_p__Cryptomycota.o__unclassified_p__Cryptomycota.f__unclassified_p__Cryptomycota		3.80033	0	-
p__Ascomycota.c__Sordariomycetes.o__Xylariales.f__unclassified_o__Xylariales.g__Phialemoniopsis		3.19187	0	-
p__Ascomycota.c__Dothideomycetes.o__Acrospermales		3.34739	0	-
p__Ascomycota.c__Leotiomycetes.o__Helotiales.f__Rutstroemiaceae.g__Rutstroemia		2.50543	0	-
p__Ascomycota.c__Dothideomycetes.o__Capnodiales		3.71748	0	-
p__Basidiomycota.c__Pucciniomycetes.o__Pucciniales.f__Pucciniaceae		3.86497	0	-
p__Mucoromycota.c__Mucoromycetes.o__Mucorales.f__Lichtheimiaceae		3.58563	0	-
p__Basidiomycota.c__Agaricomycetes.o__Cantharellales.f__Ceratobasidiaceae.g__Ceratobasidium		3.7097	0	-
p__Basidiomycota.c__Tremellomycetes.o__Trichosporonales.f__Trichosporonaceae.g__Cutaneotrichosporon		2.87795	0	-
p__Mucoromycota.c__Mucoromycetes		4.69539	0	-
p__Ascomycota.c__Eurotiomycetes.o__Verrucariales.f__Verrucariaceae.g__Endocarpon		3.65516	0	-
p__Ascomycota.c__Pezizomycetes.o__Pezizales.f__Tuberaceae		3.72291	0	-
p__Zoopagomycota.c__Kickxellomycetes.o__Kickxellales.f__Kickxellaceae.g__Linderina		3.46915	0	-
p__Ascomycota.c__Orbiliomycetes.o__Orbiliales		4.57644	0	-
p__Basidiomycota.c__Malasseziomycetes.o__Malasseziales		3.70483	0	-
p__Mucoromycota.c__Glomeromycetes.o__Diversisporales.f__Diversisporaceae.g__Diversispora		4.48392	0	-
p__Basidiomycota.c__Agaricomycetes.o__Polyporales.f__Steccherinaceae.g__Antrodiella		3.05404	0	-
p__Zoopagomycota.c__Entomophthoromycetes		3.80631	0	-
p__Ascomycota.c__Lecanoromycetes		4.47523	0	-
p__Basidiomycota.c__Agaricomycetes.o__Hymenochaetales.f__Hymenochaetaceae.g__Phellinidium		2.86638	0	-
p__Ascomycota.c__Eurotiomycetes.o__Onygenales.f__Ajellomycetaceae.g__Helicocarpus		2.92702	0	-
p__Ascomycota.c__Dothideomycetes.o__Aulographales		3.85492	0	-
p__Ascomycota.c__Sordariomycetes.o__Hypocreales		4.98548	0	-
p__Ascomycota.c__Lecanoromycetes.o__Peltigerales		2.97757	0	-
p__Basidiomycota.c__Malasseziomycetes.o__Malasseziales.f__Malasseziaceae.g__Malassezia		3.70483	0	-
p__Ascomycota.c__Dothideomycetes.o__Mytilinidiales.f__Mytilinidiaceae.g__Mytilinidion		3.42717	0	-
p__Basidiomycota.c__Agaricomycetes.o__Polyporales.f__Laetiporaceae.g__Wolfiporia		3.35759	0	-
p__Zoopagomycota.c__Harpellomycetes.o__Harpellales.f__Legeriomycetaceae		3.83687	0	-
p__Zoopagomycota.c__Harpellomycetes.o__Harpellales.f__Harpellaceae.g__Furculomyces		3.18522	0	-
p__Ascomycota.c__Sordariomycetes.o__Glomerellales.f__Plectosphaerellaceae.g__Verticillium_f__Plectosphaerellaceae		3.75739	0	-
p__Ascomycota.c__Dothideomycetes.o__Pleosporales.f__Lindgomycetaceae.g__Clohesyomyces		3.82658	0	-
p__Ascomycota.c__Orbiliomycetes.o__Orbiliales.f__Orbiliaceae.g__Arthrobotrys		4.48467	0	-
p__Ascomycota.c__Sordariomycetes.o__Xylariales.f__unclassified_o__Xylariales.g__Monosporascus		4.62563	0	-
p__Basidiomycota.c__Exobasidiomycetes		3.95775	0	-
p__Basidiomycota.c__Agaricomycetes.o__Agaricales.f__Amanitaceae.g__Amanita		3.336	0	-
p__Basidiomycota.c__Agaricomycetes.o__Agaricales.f__unclassified_o__Agaricales		3.54794	0	-
p__Ascomycota.c__Dothideomycetes.o__Aulographales.f__Rhizodiscinaceae.g__Rhizodiscina		2.70202	0	-
p__Zoopagomycota.c__Entomophthoromycetes.o__Entomophthorales.f__Ancylistaceae.g__Conidiobolus		3.80631	0	-
p__Chytridiomycota.c__Chytridiomycetes.o__Chytridiales		2.97757	0	-
p__Mucoromycota.c__Endogonomycetes.o__Endogonales.f__Endogonaceae		2.97757	0	-
p__Ascomycota.c__Leotiomycetes.o__unclassified_c__Leotiomycetes.f__Myxotrichaceae.g__Oidiodendron		3.88563	0	-
p__Ascomycota.c__Dothideomycetes.o__Pleosporales.f__Trematosphaeriaceae.g__Trematosphaeria		3.39374	0	-
p__Ascomycota.c__Dothideomycetes.o__Botryosphaeriales.f__Aplosporellaceae.g__Aplosporella		3.28027	0	-
p__Ascomycota.c__Sordariomycetes.o__Hypocreales.f__Ophiocordycipitaceae.g__Tolypocladium		3.64041	0	-
p__Ascomycota.c__unclassified_p__Ascomycota.o__unclassified_p__Ascomycota.f__unclassified_p__Ascomycota		3.23418	0	-
p__Basidiomycota.c__Agaricomycetes.o__Gloeophyllales		3.33528	0	-
p__Basidiomycota.c__Ustilaginomycetes.o__Ustilaginales.f__Ustilaginaceae.g__Anthracocystis		2.75684	0	-
p__Zoopagomycota.c__Basidiobolomycetes.o__Basidiobolales		3.17914	0	-
p__Ascomycota.c__Eurotiomycetes.o__Onygenales.f__Arthrodermataceae.g__Microsporum		3.81299	0	-
p__Ascomycota.c__Dothideomycetes.o__Capnodiales.f__Piedraiaceae.g__Piedraia		3.35183	0	-
p__Basidiomycota.c__Agaricomycetes.o__Agaricales.f__Omphalotaceae		3.86543	0	-
p__Basidiomycota.c__Agaricomycetes.o__Agaricales.f__Physalacriaceae.g__Armillaria		3.63901	0	-
p__Zoopagomycota.c__Dimargaritomycetes.o__Dimargaritales.f__Dimargaritaceae		2.94019	0	-
p__Ascomycota.c__Pezizomycetes.o__Pezizales.f__Pezizaceae		3.26422	0	-
p__Ascomycota.c__Lecanoromycetes.o__Umbilicariales		4.4612	0	-
p__Basidiomycota.c__Agaricomycetes.o__Agaricales.f__unclassified_o__Agaricales.g__Dendrothele		3.54794	0	-
p__Zoopagomycota.c__Dimargaritomycetes.o__Dimargaritales.f__Dimargaritaceae.g__Dimargaris		2.94019	0	-
p__Ascomycota.c__Dothideomycetes.o__Pleosporales.f__Pleosporaceae.g__Curvularia		3.32847	0	-
p__Ascomycota.c__Sordariomycetes.o__Sordariales.f__Chaetomiaceae		4.13807	0	-
p__Ascomycota.c__Saccharomycetes.o__Saccharomycetales.f__Trigonopsidaceae.g__Tortispora		3.6567	0	-
p__Ascomycota.c__Eurotiomycetes.o__Onygenales.f__Arthrodermataceae		4.0218	0	-
p__Basidiomycota.c__Agaricomycetes.o__Russulales.f__Bondarzewiaceae		3.56488	0	-
p__Basidiomycota.c__Agaricomycetes.o__Auriculariales.f__Exidiaceae.g__Exidia		3.70506	0	-
p__Mucoromycota.c__Mucoromycetes.o__Mucorales.f__Mucoraceae.g__Parasitella		3.05787	0	-
p__Ascomycota.c__unclassified_p__Ascomycota		3.23418	0	-
p__Ascomycota.c__Sordariomycetes.o__Glomerellales.f__Glomerellaceae.g__Colletotrichum		4.33429	0	-
p__Ascomycota.c__Sordariomycetes		5.28116	0	-
p__Ascomycota.c__Leotiomycetes.o__unclassified_c__Leotiomycetes.f__unclassified_c__Leotiomycetes.g__Scytalidium		3.5955	0	-
p__Basidiomycota.c__Exobasidiomycetes.o__Georgefischeriales.f__Tilletiariaceae.g__Tilletiaria		3.4713	0	-
p__Basidiomycota.c__Agaricomycetes.o__Polyporales.f__Gelatoporiaceae.g__Gelatoporia		3.94829	0	-
p__Ascomycota.c__Saccharomycetes		4.48667	0	-
p__Basidiomycota.c__Agaricomycetes.o__Hymenochaetales.f__Schizoporaceae.g__Schizopora		3.41263	0	-
p__Mucoromycota.c__Mucoromycetes.o__Mucorales.f__Rhizopodaceae.g__Rhizopus		3.69125	0	-
p__Microsporidia.c__unclassified_p__Microsporidia.o__unclassified_p__Microsporidia.f__unclassified_p__Microsporidia.g__Mitosporidium		3.75779	0	-
p__Basidiomycota.c__Tremellomycetes.o__Tremellales.f__Cryptococcaceae.g__Cryptococcus_f__Cryptococcaceae		3.34388	0	-
p__Basidiomycota.c__Agaricomycetes.o__Boletales		3.91377	0	-
p__Chytridiomycota.c__Chytridiomycetes.o__Caulochytriales.f__Caulochytriaceae.g__Caulochytrium		2.7921	0	-
p__Chytridiomycota.c__Chytridiomycetes.o__Synchytriales		3.99991	0	-
p__Ascomycota.c__Dothideomycetes.o__Mycosphaerellales.f__Teratosphaeriaceae.g__Friedmanniomyces		3.42056	0	-
p__Ascomycota.c__Sordariomycetes.o__Diaporthales.f__Valsaceae.g__Valsa		3.76665	0	-
p__Ascomycota.c__Dothideomycetes.o__Eremomycetales.f__Eremomycetaceae.g__Eremomyces		3.296	0	-
p__Ascomycota.c__Sordariomycetes.o__Hypocreales.f__Cordycipitaceae.g__Beauveria		3.52497	0	-
p__Ascomycota.c__Sordariomycetes.o__Hypocreales.f__Nectriaceae.g__Ilyonectria		2.40099	0	-
p__Basidiomycota.c__Tremellomycetes.o__Trichosporonales.f__Trichosporonaceae		3.41544	0	-
p__Basidiomycota.c__Agaricomycetes.o__Agaricales.f__Tricholomataceae		3.87944	0	-
p__Ascomycota.c__Eurotiomycetes.o__Onygenales.f__Arthrodermataceae.g__Trichophyton		3.10376	0	-
p__Ascomycota.c__Eurotiomycetes.o__Onygenales.f__Arthrodermataceae.g__Nannizzia		3.46844	0	-
p__Chytridiomycota.c__Chytridiomycetes.o__Caulochytriales.f__Caulochytriaceae		2.7921	0	-
p__Ascomycota.c__Sordariomycetes.o__Xylariales.f__Diatrypaceae		2.45581	0	-
p__Ascomycota.c__Sordariomycetes.o__Hypocreales.f__Hypocreaceae.g__Trichoderma		3.9859	0	-
p__Zoopagomycota.c__Zoopagomycetes.o__Zoopagales.f__Sigmoideomycetaceae		3.63575	0	-
p__Ascomycota.c__Eurotiomycetes.o__Onygenales.f__unclassified_o__Onygenales.g__Coccidioides		2.87811	0	-
p__Ascomycota.c__Orbiliomycetes		4.57644	0	-
p__Basidiomycota.c__Agaricomycetes.o__Geastrales.f__Sphaerobolaceae		3.22805	0	-
p__Ascomycota.c__Sordariomycetes.o__Xylariales.f__Xylariaceae		3.64959	0	-
p__Microsporidia.c__unclassified_p__Microsporidia.o__unclassified_p__Microsporidia		3.77865	0	-
p__Basidiomycota.c__Agaricomycetes.o__Agaricales.f__Pleurotaceae.g__Pleurotus		2.7921	0	-
p__Basidiomycota.c__Tremellomycetes		4.47264	0	-
p__Blastocladiomycota.c__Blastocladiomycetes.o__Blastocladiales		3.33616	0	-
p__Ascomycota.c__Sordariomycetes.o__Hypocreales.f__Hypocreaceae		3.9859	0	-
p__Ascomycota.c__Eurotiomycetes.o__Eurotiales.f__Elaphomycetaceae.g__Elaphomyces		3.53496	0	-
p__Ascomycota.c__Dothideomycetes.o__Botryosphaeriales.f__Botryosphaeriaceae		3.79861	0	-
p__Basidiomycota.c__Tremellomycetes.o__Tremellales.f__Cryptococcaceae		3.34388	0	-
p__Basidiomycota.c__Agaricomycetes.o__Agaricales.f__Pterulaceae		3.83278	0	-
p__Blastocladiomycota.c__Blastocladiomycetes		3.33616	0	-
p__Ascomycota.c__Dothideomycetes.o__Lineolatales.f__Lineolataceae.g__Lineolata		2.85449	0	-
p__Ascomycota.c__Dothideomycetes.o__Pleosporales.f__Trematosphaeriaceae		3.39374	0	-
p__Chytridiomycota.c__Chytridiomycetes.o__Chytridiales.f__Chytriomycetaceae		2.97757	0	-
p__Basidiomycota.c__Agaricomycetes.o__Cantharellales.f__Botryobasidiaceae.g__Botryobasidium		3.00305	0	-
p__Basidiomycota.c__Ustilaginomycetes.o__Ustilaginales.f__Ustilaginaceae.g__Moesziomyces		4.09718	0	-
p__Zoopagomycota.c__Dimargaritomycetes.o__Dimargaritales		2.94019	0	-
p__Ascomycota.c__Sordariomycetes.o__Hypocreales.f__Clavicipitaceae.g__Pochonia		3.66831	0	-
p__Chytridiomycota.c__Neocallimastigomycetes		3.94868	0	-
p__Ascomycota.c__Dothideomycetes.o__Aulographales.f__Aulographaceae		3.82325	0	-
p__Ascomycota.c__Leotiomycetes.o__Erysiphales.f__Erysiphaceae.g__Oidium		3.10707	0	-
p__Basidiomycota.c__Agaricomycetes.o__Atheliales.f__Atheliaceae.g__Piloderma		3.24173	0	-
p__Basidiomycota.c__Agaricomycetes.o__Boletales.f__Suillaceae		3.82466	0	-
p__Basidiomycota.c__Agaricomycetes		5.12633	0	-
p__Ascomycota.c__Dothideomycetes.o__Pleosporales.f__Lophiotremataceae.g__Lophiotrema		3.49113	0	-
p__Mucoromycota.c__Mucoromycetes.o__Mucorales.f__Cunninghamellaceae		3.03058	0	-
p__Basidiomycota.c__Agaricomycetes.o__Auriculariales.f__Auriculariaceae.g__Auricularia		2.96819	0	-
p__Ascomycota.c__Sordariomycetes.o__Hypocreales.f__Ophiocordycipitaceae.g__Hirsutella		3.09996	0	-
p__Ascomycota.c__Leotiomycetes.o__Helotiales.f__Sclerotiniaceae.g__Botryotinia		4.01083	0	-
p__Ascomycota.c__Dothideomycetes.o__Eremomycetales		3.296	0	-
p__Ascomycota.c__Sordariomycetes.o__Sordariales.f__Chaetomiaceae.g__Podospora		3.38914	0	-
p__Basidiomycota.c__Agaricomycetes.o__Agaricales.f__Pterulaceae.g__Pterula		3.83278	0	-
p__Ascomycota.c__Sordariomycetes.o__Sordariales.f__Chaetomiaceae.g__Thermothelomyces		3.61008	0	-
p__Basidiomycota.c__Agaricomycetes.o__Agaricales.f__Cortinariaceae.g__Hebeloma		3.39416	0	-
p__Ascomycota.c__Dothideomycetes.o__Phaeotrichales.f__Phaeotrichaceae		3.29368	0	-
p__Basidiomycota.c__Microbotryomycetes.o__Sporidiobolales		3.09996	0	-
p__Ascomycota.c__Dothideomycetes.o__unclassified_c__Dothideomycetes		4.8559	0	-
p__Ascomycota.c__Saccharomycetes.o__Saccharomycetales.f__Trigonopsidaceae		3.6567	0	-
p__Zoopagomycota.c__Harpellomycetes.o__Harpellales.f__Legeriomycetaceae.g__Smittium		3.83687	0	-
p__Basidiomycota.c__Agaricomycetes.o__Agaricales.f__Agaricaceae.g__Leucoagaricus		3.87163	0	-
p__Ascomycota.c__Dothideomycetes.o__Microthyriales.f__Microthyriaceae.g__Microthyrium		3.10251	0	-
p__Mucoromycota.c__Glomeromycetes.o__Diversisporales		4.52666	0	-
p__Ascomycota.c__Leotiomycetes.o__Helotiales.f__Lachnaceae		2.75684	0	-
p__Ascomycota.c__Dothideomycetes.o__Pleosporales.f__Pleosporaceae.g__Pyrenophora		3.72826	0	-
p__Ascomycota.c__Eurotiomycetes.o__Onygenales.f__Ajellomycetaceae.g__Blastomyces		3.05195	0	-
p__Basidiomycota.c__Agaricomycetes.o__Auriculariales		3.70506	0	-
p__Zoopagomycota.c__Kickxellomycetes.o__Kickxellales.f__Kickxellaceae.g__Coemansia		3.12996	0	-
p__Chytridiomycota.c__Chytridiomycetes.o__Caulochytriales		2.7921	0	-
p__Basidiomycota.c__Wallemiomycetes.o__Wallemiales.f__Wallemiaceae		3.17914	0	-
p__Ascomycota.c__Saccharomycetes.o__Saccharomycetales.f__Dipodascaceae		3.16517	0	-
p__Ascomycota.c__Sordariomycetes.o__Hypocreales.f__unclassified_o__Hypocreales.g__Acremonium_o__Hypocreales		3.88314	0	-
p__Basidiomycota.c__Agaricomycetes.o__Boletales.f__Suillaceae.g__Suillus		3.82466	0	-
p__Ascomycota.c__Dothideomycetes.o__Capnodiales.f__Piedraiaceae		3.35183	0	-
p__Chytridiomycota		4.51632	0	-
p__Ascomycota.c__Dothideomycetes.o__Patellariales.f__Patellariaceae		3.33619	0	-
p__Cryptomycota.c__unclassified_p__Cryptomycota		3.80033	0	-
p__Ascomycota.c__Dothideomycetes.o__Pleosporales.f__Tetraplosphaeriaceae.g__Polyplosphaeria		3.37519	0	-
p__Basidiomycota.c__Agaricomycetes.o__Agaricales.f__Lyophyllaceae.g__Termitomyces		3.53245	0	-
p__Zoopagomycota.c__Kickxellomycetes.o__Kickxellales.f__Kickxellaceae		3.63289	0	-
p__Ascomycota.c__Dothideomycetes.o__unclassified_c__Dothideomycetes.f__Pseudoperisporiaceae.g__Lizonia		3.91493	0	-
p__Ascomycota.c__Saccharomycetes.o__Saccharomycetales.f__Dipodascaceae.g__Geotrichum		3.16517	0	-
p__Ascomycota.c__Eurotiomycetes.o__Onygenales.f__unclassified_o__Onygenales		2.87811	0	-
p__Ascomycota.c__Saccharomycetes.o__Saccharomycetales.f__Saccharomycetaceae		2.96819	0	-
p__Ascomycota.c__Sordariomycetes.o__Sordariales.f__unclassified_o__Sordariales.g__Madurella		3.5398	0	-
p__Ascomycota.c__Dothideomycetes.o__Pleosporales.f__Diademaceae.g__Clathrospora		3.43716	0	-
p__Basidiomycota.c__Agaricomycetes.o__Russulales		3.74335	0	-
p__Basidiomycota.c__Agaricomycetes.o__Polyporales.f__Steccherinaceae.g__Steccherinum		3.77969	0	-
p__Ascomycota.c__Sordariomycetes.o__Xylariales.f__Sporocadaceae.g__Pestalotiopsis		3.26016	0	-
p__Basidiomycota.c__Pucciniomycetes.o__Pucciniales.f__Melampsoraceae.g__Melampsora		3.66973	0	-
p__Basidiomycota.c__Agaricomycetes.o__Agaricales.f__Omphalotaceae.g__Gymnopus		3.7887	0	-
p__Ascomycota.c__Dothideomycetes.o__Acrospermales.f__Acrospermaceae		3.34739	0	-
p__Basidiomycota.c__Agaricomycetes.o__Cantharellales.f__Ceratobasidiaceae.g__Rhizoctonia		4.07527	0	-
p__Zoopagomycota.c__Basidiobolomycetes.o__Basidiobolales.f__Basidiobolaceae		3.17914	0	-
p__Ascomycota.c__Saccharomycetes.o__Saccharomycetales.f__unclassified_o__Saccharomycetales.g__Diutina		3.00305	0	-
p__Ascomycota.c__Dothideomycetes		5.20324	0	-
p__Ascomycota.c__Dothideomycetes.o__Acrospermales.f__Acrospermaceae.g__Pseudovirgaria		3.34739	0	-
p__Ascomycota.c__Dothideomycetes.o__Microthyriales		3.10251	0	-
p__Basidiomycota.c__Exobasidiomycetes.o__Tilletiales.f__Tilletiaceae		3.56119	0	-
p__Mucoromycota.c__Glomeromycetes.o__Diversisporales.f__Diversisporaceae		4.48392	0	-
p__Ascomycota.c__Eurotiomycetes.o__Verrucariales.f__Verrucariaceae		3.65516	0	-
p__Ascomycota.c__Leotiomycetes.o__Helotiales.f__Dermateaceae.g__Diplocarpon		3.39544	0	-
p__Mucoromycota.c__Mortierellomycetes		3.78424	0	-
p__Basidiomycota.c__Wallemiomycetes.o__Wallemiales.f__Wallemiaceae.g__Wallemia		3.17914	0	-
p__Ascomycota.c__Sordariomycetes.o__Xylariales		4.66843	0	-
p__Ascomycota.c__Leotiomycetes.o__Helotiales		4.85636	0	-
p__Microsporidia.c__unclassified_p__Microsporidia.o__unclassified_p__Microsporidia.f__unclassified_p__Microsporidia.g__Pseudoloma		3.35011	0	-
p__Ascomycota.c__Sordariomycetes.o__Hypocreales.f__Bionectriaceae		3.35523	0	-
p__Basidiomycota.c__Agaricomycetes.o__Atheliales.f__Atheliaceae		3.62875	0	-
p__Basidiomycota.c__Agaricomycetes.o__Russulales.f__Stereaceae.g__Stereum		3.19085	0	-
p__Zoopagomycota.c__Entomophthoromycetes.o__Entomophthorales.f__Ancylistaceae		3.80631	0	-
p__Basidiomycota.c__Dacrymycetes.o__Dacrymycetales		3.43105	0	-
p__Basidiomycota.c__Agaricomycetes.o__Geastrales.f__Sphaerobolaceae.g__Sphaerobolus		3.22805	0	-
p__Ascomycota.c__Leotiomycetes.o__Helotiales.f__Sclerotiniaceae.g__Sclerotinia		4.29674	0	-
p__Ascomycota.c__Eurotiomycetes.o__Eurotiales.f__Aspergillaceae.g__Aspergillus		4.83732	0	-
p__Blastocladiomycota		3.33616	0	-
p__Ascomycota.c__Leotiomycetes.o__unclassified_c__Leotiomycetes.f__Pseudeurotiaceae		4.46797	0	-
p__Zoopagomycota.c__Basidiobolomycetes		3.17914	0	-
p__Ascomycota.c__Leotiomycetes.o__Helotiales.f__unclassified_o__Helotiales.g__Chalara		3.03058	0	-
p__Zoopagomycota.c__Zoopagomycetes.o__Zoopagales		3.8306	0	-
p__Mucoromycota.c__Glomeromycetes.o__Glomerales.f__Glomeraceae.g__Rhizophagus_f__Glomeraceae		4.4122	0	-
p__Basidiomycota.c__Agaricomycetes.o__Agaricales.f__Mycenaceae		3.62315	0	-
p__Basidiomycota.c__Agaricomycetes.o__Hymenochaetales.f__Hymenochaetaceae.g__Fomitiporia		3.34162	0	-
p__Zoopagomycota.c__Zoopagomycetes.o__Zoopagales.f__Piptocephalidaceae.g__Syncephalis		3.34048	0	-
p__Basidiomycota.c__Agaricomycetes.o__Agaricales.f__Physalacriaceae		3.76829	0	-
p__Ascomycota.c__Lecanoromycetes.o__Peltigerales.f__Peltigeraceae.g__Peltigera		2.97757	0	-
p__Ascomycota.c__Dothideomycetes.o__Dothideales.f__Saccotheciaceae		3.55206	0	-
p__Ascomycota.c__Leotiomycetes.o__Helotiales.f__Dermateaceae		4.154	0	-
p__Zoopagomycota.c__Basidiobolomycetes.o__Basidiobolales.f__Basidiobolaceae.g__Basidiobolus		3.17914	0	-
p__Basidiomycota.c__Agaricomycetes.o__Agaricales.f__Schizophyllaceae.g__Auriculariopsis		3.17914	0	-
p__Basidiomycota.c__Agaricomycetes.o__Agaricales.f__Marasmiaceae.g__Moniliophthora		3.8611	0	-
p__Ascomycota.c__Leotiomycetes.o__unclassified_c__Leotiomycetes.f__Pseudeurotiaceae.g__Pseudogymnoascus		4.46797	0	-
p__Ascomycota.c__Dothideomycetes.o__Pleosporales.f__unclassified_o__Pleosporales		3.40541	0	-
p__Cryptomycota		3.80033	0	-
p__Basidiomycota.c__Exobasidiomycetes.o__Exobasidiales		3.38311	0	-
p__Basidiomycota.c__Agaricomycetes.o__Russulales.f__Stereaceae		3.19085	0	-
p__Basidiomycota.c__Agaricomycetes.o__Polyporales.f__Steccherinaceae		3.79748	0	-
p__Ascomycota.c__Dothideomycetes.o__Mycosphaerellales.f__Mycosphaerellaceae		3.88295	0	-
p__Microsporidia		3.77865	0	-
p__Zoopagomycota.c__Zoopagomycetes.o__Zoopagales.f__Piptocephalidaceae.g__Piptocephalis		3.35298	0	-
p__Ascomycota.c__Sordariomycetes.o__Xylariales.f__Sporocadaceae		3.26016	0	-
p__Basidiomycota.c__Exobasidiomycetes.o__Microstromatales		2.80148	0	-
p__Mucoromycota.c__Endogonomycetes		3.63264	0	-
p__Ascomycota.c__Sordariomycetes.o__Hypocreales.f__Nectriaceae.g__Neonectria		3.36815	0	-
p__Ascomycota.c__Dothideomycetes.o__Pleosporales.f__Periconiaceae.g__Periconia		3.34388	0	-
p__Ascomycota.c__Sordariomycetes.o__Sordariales.f__unclassified_o__Sordariales		3.5398	0	-
p__Zoopagomycota.c__Harpellomycetes		3.83687	0	-
p__Basidiomycota.c__Agaricomycetes.o__Russulales.f__Peniophoraceae.g__Peniophora		3.32212	0	-
p__Ascomycota.c__Dothideomycetes.o__Pleosporales.f__Lophiotremataceae		3.49113	0	-
p__Ascomycota.c__Dothideomycetes.o__unclassified_c__Dothideomycetes.f__unclassified_c__Dothideomycetes.g__Cryomyces		3.47475	0	-
p__Ascomycota.c__Dothideomycetes.o__unclassified_c__Dothideomycetes.f__unclassified_c__Dothideomycetes		3.47475	0	-
p__Basidiomycota.c__Agaricomycetes.o__Polyporales.f__Fomitopsidaceae.g__Fomitopsis		2.44989	0	-
p__Basidiomycota.c__Agaricomycetes.o__Hymenochaetales.f__Schizoporaceae		3.41263	0	-
p__Ascomycota.c__Lecanoromycetes.o__Peltigerales.f__Peltigeraceae		2.97757	0	-
p__Basidiomycota.c__Agaricomycetes.o__Polyporales.f__Grifolaceae.g__Grifola		3.26666	0	-
p__Basidiomycota.c__Agaricomycetes.o__Agaricales.f__Marasmiaceae		3.8611	0	-
p__Cryptomycota.c__unclassified_p__Cryptomycota.o__unclassified_p__Cryptomycota		3.80033	0	-
p__Ascomycota.c__Dothideomycetes.o__Eremomycetales.f__Eremomycetaceae		3.296	0	-
p__Chytridiomycota.c__Neocallimastigomycetes.o__Neocallimastigales.f__Neocallimastigaceae.g__Piromyces		3.72899	0	-
p__Basidiomycota.c__Tremellomycetes.o__Trichosporonales		3.41544	0	-
p__Basidiomycota.c__Malasseziomycetes		3.70483	0	-
p__Basidiomycota.c__Ustilaginomycetes.o__Ustilaginales.f__Ustilaginaceae.g__Ustilago		3.50021	0	-
p__Ascomycota.c__Dothideomycetes.o__Aulographales.f__Aulographaceae.g__Aulographum		3.82325	0	-
p__Ascomycota.c__Dothideomycetes.o__Mytilinidiales.f__Mytilinidiaceae		3.67622	0	-
p__Mucoromycota.c__Glomeromycetes.o__Glomerales.f__Glomeraceae.g__Glomus		3.51011	0	-
p__Basidiomycota.c__Agaricomycetes.o__Agaricales.f__Strophariaceae		3.58914	0	-
p__Ascomycota.c__Dothideomycetes.o__Pleosporales.f__Diademaceae		3.43716	0	-
p__Ascomycota.c__Neolectomycetes.o__Neolectales.f__Neolectaceae		3.24609	0	-
p__Basidiomycota.c__Wallemiomycetes.o__Wallemiales		3.17914	0	-
p__Ascomycota.c__Dothideomycetes.o__unclassified_c__Dothideomycetes.f__Zopfiaceae.g__Zopfia		4.57652	0	-
p__Chytridiomycota.c__Neocallimastigomycetes.o__Neocallimastigales.f__Neocallimastigaceae.g__Neocallimastix		3.82896	0	-
p__Ascomycota.c__Dothideomycetes.o__Phaeotrichales.f__Phaeotrichaceae.g__Trichodelitschia		3.29368	0	-
p__Basidiomycota.c__Agaricomycetes.o__Agaricales.f__Amanitaceae		3.336	0	-
p__Basidiomycota.c__Agaricomycetes.o__Cantharellales.f__Botryobasidiaceae		3.00305	0	-
p__Ascomycota.c__Leotiomycetes.o__Helotiales.f__Leotiaceae.g__Pezoloma		3.08076	0	-
p__Ascomycota.c__Sordariomycetes.o__Diaporthales		3.76665	0	-
p__Basidiomycota.c__Agaricomycetes.o__Agaricales.f__Tricholomataceae.g__Laccaria		3.87944	0	-
p__Ascomycota.c__Dothideomycetes.o__unclassified_c__Dothideomycetes.f__Gloniaceae		4.60975	0	-
p__Ascomycota.c__Saccharomycetes.o__Saccharomycetales.f__Phaffomycetaceae		3.09996	0	-
p__Basidiomycota.c__Exobasidiomycetes.o__Entylomatales.f__unclassified_o__Entylomatales		3.34378	0	-
p__Basidiomycota.c__Agaricomycetes.o__Polyporales.f__Laetiporaceae		3.35759	0	-
p__Ascomycota.c__Dothideomycetes.o__Cladosporiales.f__Cladosporiaceae		3.57895	0	-
p__Basidiomycota.c__Agaricomycetes.o__Polyporales.f__Dacryobolaceae.g__Postia		3.24221	0	-
p__Zoopagomycota.c__Harpellomycetes.o__Harpellales.f__Harpellaceae		3.18522	0	-
p__Ascomycota.c__Dothideomycetes.o__Aulographales.f__Rhizodiscinaceae		2.70202	0	-
p__Ascomycota.c__Schizosaccharomycetes.o__Schizosaccharomycetales		3.28193	0	-
p__Basidiomycota.c__Agaricomycetes.o__Agaricales.f__Pleurotaceae		2.7921	0	-
p__Ascomycota.c__Dothideomycetes.o__Venturiales.f__Venturiaceae		3.93815	0	-
p__Basidiomycota.c__Agaricomycetes.o__Russulales.f__Bondarzewiaceae.g__Bondarzewia		3.56488	0	-
p__Ascomycota.c__Sordariomycetes.o__Ophiostomatales.f__Ophiostomataceae.g__Sporothrix		3.53384	0	-
p__Zoopagomycota.c__Harpellomycetes.o__Harpellales		3.83687	0	-
p__Blastocladiomycota.c__Blastocladiomycetes.o__Blastocladiales.f__Catenariaceae.g__Catenaria		3.33616	0	-
p__Basidiomycota.c__Dacrymycetes.o__Dacrymycetales.f__Dacrymycetaceae		3.43105	0	-
p__Chytridiomycota.c__Chytridiomycetes.o__Synchytriales.f__Synchytriaceae.g__Synchytrium		3.99991	0	-
p__Basidiomycota.c__Agaricomycetes.o__Agaricales.f__Psathyrellaceae.g__Coprinellus		2.98213	0	-
p__Ascomycota.c__Dothideomycetes.o__Pleosporales.f__Massarinaceae.g__Byssothecium		2.70202	0	-
p__Ascomycota.c__Sordariomycetes.o__Diaporthales.f__Diaporthaceae.g__Diaporthe		3.23396	0	-
p__Ascomycota.c__Eurotiomycetes.o__Eurotiales.f__Thermoascaceae		3.722	0	-
p__Basidiomycota.c__Agaricomycetes.o__Agaricales.f__Schizophyllaceae		3.30091	0	-
p__Ascomycota.c__Eurotiomycetes.o__Onygenales		4.30272	0	-
p__Zoopagomycota.c__Zoopagomycetes.o__Zoopagales.f__Piptocephalidaceae		3.64781	0	-
p__Ascomycota.c__Sordariomycetes.o__Ophiostomatales		3.53384	0	-
p__Ascomycota.c__Saccharomycetes.o__Saccharomycetales.f__Phaffomycetaceae.g__Wickerhamomyces		3.09996	0	-
p__Ascomycota.c__Sordariomycetes.o__Diaporthales.f__Valsaceae		3.76665	0	-
p__Ascomycota.c__Sordariomycetes.o__Hypocreales.f__Bionectriaceae.g__Geosmithia		3.17914	0	-

## Sheet: Archaea
Supplementary Table S3. (c) Discriminant result of LEfSE of soil archaea.
Species name	Treatment	Mean	LDA_value	Pvalue
p__Thaumarchaeota	PBC	5.79112	4.7728	0.0389902
p__Euryarchaeota	CK	5.56166	4.74165	0.0273237
p__Thaumarchaeota.c__Nitrososphaeria.o__Nitrososphaerales	PBC	5.55994	4.62403	0.0389902
p__Euryarchaeota.c__Methanomicrobia	CK	5.40711	4.5596	0.0273237
p__Thaumarchaeota.c__Nitrososphaeria	PBC	5.56251	4.51588	0.0389902
p__Thaumarchaeota.c__Nitrososphaeria.o__Nitrososphaerales.f__Nitrososphaeraceae	PBC	5.5539	4.44902	0.0389902
p__Euryarchaeota.c__Methanomicrobia.o__Methanosarcinales	CK	5.08275	4.3252	0.0389902
p__Candidatus_Bathyarchaeota.c__unclassified_p__Candidatus_Bathyarchaeota.o__unclassified_p__Candidatus_Bathyarchaeota.f__unclassified_p__Candidatus_Bathyarchaeota.g__unclassified_p__Candidatus_Bathyarchaeota	PSBC	4.93985	4.27998	0.0389902
p__Candidatus_Bathyarchaeota.c__unclassified_p__Candidatus_Bathyarchaeota.o__unclassified_p__Candidatus_Bathyarchaeota	PSBC	4.93985	4.2652	0.0389902
p__Euryarchaeota.c__Methanomicrobia.o__Methanosarcinales.f__Methanotrichaceae	CK	4.91696	4.25302	0.0273237
p__Thaumarchaeota.c__unclassified_p__Thaumarchaeota	PBC	5.40313	4.25234	0.0273237
p__Candidatus_Bathyarchaeota.c__unclassified_p__Candidatus_Bathyarchaeota.o__unclassified_p__Candidatus_Bathyarchaeota.f__unclassified_p__Candidatus_Bathyarchaeota	PSBC	4.93985	4.25221	0.0389902
p__Thaumarchaeota.c__Nitrososphaeria.o__Nitrososphaerales.f__Nitrososphaeraceae.g__unclassified_f__Nitrososphaeraceae	PBC	5.24565	4.25138	0.0389902
p__Candidatus_Bathyarchaeota.c__unclassified_p__Candidatus_Bathyarchaeota	PSBC	4.93985	4.23773	0.0389902
p__Candidatus_Bathyarchaeota	PSBC	4.93985	4.22412	0.0389902
p__Thaumarchaeota.c__unclassified_p__Thaumarchaeota.o__unclassified_p__Thaumarchaeota	PBC	5.09264	4.13847	0.0273237
p__Nanoarchaeota.c__unclassified_p__Nanoarchaeota.o__unclassified_p__Nanoarchaeota.f__unclassified_p__Nanoarchaeota.g__Candidatus_Nanoclepta	PBC	0.826767	4.13666	0.0347353
p__Thaumarchaeota.c__unclassified_p__Thaumarchaeota.o__Nitrosopumilales.f__unclassified_o__Nitrosopumilales	PBC	5.09659	4.09081	0.0389902
p__Euryarchaeota.c__Methanomicrobia.o__Methanosarcinales.f__Methanotrichaceae.g__Methanothrix	CK	4.7826	4.0742	0.0273237
p__Euryarchaeota.c__Methanobacteria.o__Methanobacteriales	CK	4.81838	4.06388	0.0389902
p__Euryarchaeota.c__Methanobacteria.o__Methanobacteriales.f__Methanobacteriaceae	CK	4.80815	4.04491	0.0389902
p__Thaumarchaeota.c__Nitrososphaeria.o__Nitrososphaerales.f__Nitrososphaeraceae.g__Nitrososphaera	PBC	5.04936	4.03471	0.0273237
p__Euryarchaeota.c__Methanobacteria	CK	4.81838	4.02652	0.0389902
p__Thaumarchaeota.c__unclassified_p__Thaumarchaeota.o__unclassified_p__Thaumarchaeota.f__unclassified_p__Thaumarchaeota	PBC	5.09264	4.00233	0.0273237
p__Thaumarchaeota.c__unclassified_p__Thaumarchaeota.o__Nitrosopumilales.f__unclassified_o__Nitrosopumilales.g__unclassified_o__Nitrosopumilales	PBC	5.09659	3.96631	0.0389902
p__Euryarchaeota.c__Methanobacteria.o__Methanobacteriales.f__Methanobacteriaceae.g__Methanobacterium	CK	4.79776	3.95547	0.0389902
p__Thaumarchaeota.c__unclassified_p__Thaumarchaeota.o__unclassified_p__Thaumarchaeota.f__unclassified_p__Thaumarchaeota.g__unclassified_p__Thaumarchaeota	PBC	5.06727	3.9292	0.0273237
p__Thaumarchaeota.c__Nitrososphaeria.o__Nitrososphaerales.f__Nitrososphaeraceae.g__Candidatus_Nitrosocosmicus	PBC	4.84461	3.84224	0.0273237
p__Thaumarchaeota.c__unclassified_p__Thaumarchaeota.o__Nitrosopumilales	PBC	5.11104	3.7445	0.0389902
p__Euryarchaeota.c__Methanomicrobia.o__Methanosarcinales.f__Methanotrichaceae.g__unclassified_f__Methanotrichaceae	CK	4.34201	3.66719	0.0273237
p__Euryarchaeota.c__Halobacteria.o__Natrialbales.f__Natrialbaceae.g__Natronobacterium	PBC	1.7066	3.52477	0.0389902
p__Euryarchaeota.c__Methanococci.o__Methanococcales.f__Methanococcaceae.g__Methanococcus	PSBC	2.28812	3.49361	0.0273237
p__Euryarchaeota.c__Thermoplasmata.o__Methanomassiliicoccales	PSBC	3.86771	3.44855	0.0273237
p__Euryarchaeota.c__unclassified_p__Euryarchaeota.o__unclassified_p__Euryarchaeota.f__unclassified_p__Euryarchaeota	CK	4.26911	3.38544	0.0273237
p__Euryarchaeota.c__Methanobacteria.o__Methanobacteriales.f__Methanobacteriaceae.g__unclassified_f__Methanobacteriaceae	CK	2.06837	3.367	0.0273237
p__Euryarchaeota.c__Thermoplasmata.o__Methanomassiliicoccales.f__Methanomassiliicoccaceae.g__Methanomassiliicoccus	PSBC	3.69127	3.28909	0.0273237
p__Euryarchaeota.c__Thermoplasmata.o__Methanomassiliicoccales.f__Methanomassiliicoccaceae	PSBC	3.69172	3.28718	0.0273237
p__Euryarchaeota.c__unclassified_p__Euryarchaeota.o__unclassified_p__Euryarchaeota	CK	4.26911	3.2337	0.0273237
p__Euryarchaeota.c__unclassified_p__Euryarchaeota	CK	4.26911	3.19384	0.0273237
p__Euryarchaeota.c__unclassified_p__Euryarchaeota.o__unclassified_p__Euryarchaeota.f__unclassified_p__Euryarchaeota.g__unclassified_p__Euryarchaeota	CK	4.26803	3.1503	0.0273237
p__Euryarchaeota.c__Halobacteria	CK	4.03528	3.12868	0.0273237
p__Euryarchaeota.c__Thermoplasmata.o__Methanomassiliicoccales.f__unclassified_o__Methanomassiliicoccales.g__unclassified_o__Methanomassiliicoccales	PSBC	3.39037	3.06417	0.0389902
p__Euryarchaeota.c__Thermoplasmata.o__Methanomassiliicoccales.f__unclassified_o__Methanomassiliicoccales	PSBC	3.39037	3.02892	0.0389902
p__Euryarchaeota.c__Candidatus_Poseidoniia.o__Candidatus_Poseidoniales.f__unclassified_o__Candidatus_Poseidoniales	CK	2.68245	2.92685	0.0389902
p__Euryarchaeota.c__Candidatus_Poseidoniia.o__Candidatus_Poseidoniales.f__unclassified_o__Candidatus_Poseidoniales.g__unclassified_o__Candidatus_Poseidoniales	CK	2.68245	2.90914	0.0389902
p__Euryarchaeota.c__Halobacteria.o__unclassified_c__Halobacteria	CK	3.33262	2.88815	0.0389902
p__Euryarchaeota.c__Halobacteria.o__unclassified_c__Halobacteria.f__unclassified_c__Halobacteria.g__unclassified_c__Halobacteria	CK	3.33262	2.87076	0.0389902
p__Euryarchaeota.c__Halobacteria.o__Natrialbales	CK	3.33375	2.84651	0.0273237
p__Euryarchaeota.c__Halobacteria.o__unclassified_c__Halobacteria.f__unclassified_c__Halobacteria	CK	3.33262	2.83492	0.0389902
p__Euryarchaeota.c__Candidatus_Poseidoniia	CK	2.72393	2.8291	0.0389902
p__Euryarchaeota.c__Halobacteria.o__Natrialbales.f__Natrialbaceae	CK	3.33375	2.81849	0.0273237
p__Euryarchaeota.c__Candidatus_Poseidoniia.o__Candidatus_Poseidoniales	CK	2.68467	2.78861	0.0389902
p__Euryarchaeota.c__Halobacteria.o__Haloferacales.f__Haloferacaceae	PBC	3.32154	2.61491	0.0389902
p__Candidatus_Verstraetearchaeota.c__Candidatus_Methanomethylia		2.40006	0	-
p__unclassified_d__Archaea.c__unclassified_d__Archaea		4.58675	0	-
p__Euryarchaeota.c__Methanomicrobia.o__Methanosarcinales.f__Methanosarcinaceae.g__Methanolobus		2.9364	0	-
p__Euryarchaeota.c__unclassified_p__Euryarchaeota.o__unclassified_p__Euryarchaeota.f__unclassified_p__Euryarchaeota.g__Aciduliprofundum		1.76881	0	-
p__Euryarchaeota.c__Candidatus_Methanofastidiosa.o__unclassified_c__Candidatus_Methanofastidiosa		2.9717	0	-
p__Candidatus_Nezhaarchaeota.c__unclassified_p__Candidatus_Nezhaarchaeota		1.11416	0	-
p__Euryarchaeota.c__Methanopyri.o__unclassified_c__Methanopyri.f__unclassified_c__Methanopyri		1.48693	0	-
p__Euryarchaeota.c__Halobacteria.o__Halobacteriales.f__Haloarculaceae.g__Halomicrobium		2.16511	0	-
p__Euryarchaeota.c__Candidatus_Methanoliparia.o__Candidatus_Methanoliparales.f__Candidatus_Methanollivieraceae.g__Candidatus_Methanolliviera		1.89079	0	-
p__Euryarchaeota.c__Methanococci.o__Methanococcales.f__Methanococcaceae.g__unclassified_f__Methanococcaceae		1.62265	0	-
p__Euryarchaeota.c__Methanonatronarchaeia.o__unclassified_c__Methanonatronarchaeia.f__unclassified_c__Methanonatronarchaeia		0.756353	0	-
p__Euryarchaeota.c__Halobacteria.o__Halobacteriales.f__Haloarculaceae.g__Halorientalis		1.8774	0	-
p__Euryarchaeota.c__Halobacteria.o__Halobacteriales.f__Halobacteriaceae.g__Halovenus		0.842045	0	-
p__Euryarchaeota.c__Methanomicrobia.o__Methanomicrobiales.f__Methanoregulaceae.g__Methanoregula		3.35258	0	-
p__Euryarchaeota.c__Archaeoglobi.o__unclassified_c__Archaeoglobi.f__unclassified_c__Archaeoglobi.g__unclassified_c__Archaeoglobi		1.25911	0	-
p__Euryarchaeota.c__Halobacteria.o__Haloferacales.f__unclassified_o__Haloferacales		1.11682	0	-
p__Euryarchaeota.c__Methanococci.o__unclassified_c__Methanococci.f__unclassified_c__Methanococci.g__unclassified_c__Methanococci		0.47182	0	-
p__Candidatus_Parvarchaeota.c__unclassified_p__Candidatus_Parvarchaeota		0.726539	0	-
p__Crenarchaeota.c__Thermoprotei.o__Desulfurococcales.f__Desulfurococcaceae.g__Aeropyrum		0.662159	0	-
p__Thaumarchaeota.c__Nitrososphaeria.o__Candidatus_Nitrosocaldales		3.01291	0	-
p__Euryarchaeota.c__Methanomicrobia.o__Methanomicrobiales.f__Methanomicrobiaceae.g__Methanoplanus		2.12977	0	-
p__Crenarchaeota.c__unclassified_p__Crenarchaeota		4.21432	0	-
p__Euryarchaeota.c__Methanomicrobia.o__Methanophagales.f__unclassified_o__Methanophagales		3.27841	0	-
p__Candidatus_Diapherotrites.c__unclassified_p__Candidatus_Diapherotrites.o__unclassified_p__Candidatus_Diapherotrites.f__unclassified_p__Candidatus_Diapherotrites		2.74389	0	-
p__Candidatus_Diapherotrites		2.74389	0	-
p__Candidatus_Korarchaeota.c__unclassified_p__Candidatus_Korarchaeota.o__unclassified_p__Candidatus_Korarchaeota		3.07822	0	-
p__Euryarchaeota.c__Methanomicrobia.o__Methanosarcinales.f__Methanosarcinaceae.g__Methanosalsum		1.73469	0	-
p__Crenarchaeota.c__Thermoprotei.o__Sulfolobales.f__Sulfolobaceae.g__Sulfodiicoccus		1.28166	0	-
p__Euryarchaeota.c__Thermoplasmata.o__Thermoplasmatales.f__unclassified_o__Thermoplasmatales		3.13178	0	-
p__Euryarchaeota.c__Archaeoglobi.o__Archaeoglobales.f__Archaeoglobaceae.g__Ferroglobus		1.76912	0	-
p__Candidatus_Micrarchaeota.c__unclassified_p__Candidatus_Micrarchaeota.o__unclassified_p__Candidatus_Micrarchaeota		2.80751	0	-
p__Candidatus_Verstraetearchaeota.c__unclassified_p__Candidatus_Verstraetearchaeota.o__unclassified_p__Candidatus_Verstraetearchaeota		2.4807	0	-
p__Thaumarchaeota.c__unclassified_p__Thaumarchaeota.o__Nitrosopumilales.f__Nitrosopumilaceae.g__Candidatus_Nitrosomarinus		1.72319	0	-
p__Euryarchaeota.c__Methanobacteria.o__Methanobacteriales.f__unclassified_o__Methanobacteriales		3.16127	0	-
p__Euryarchaeota.c__Candidatus_Methanoliparia.o__Candidatus_Methanoliparales.f__Candidatus_Methanollivieraceae.g__unclassified_f__Candidatus_Methanollivieraceae		2.20793	0	-
p__Thaumarchaeota.c__unclassified_p__Thaumarchaeota.o__Nitrosopumilales.f__Nitrosopumilaceae.g__Nitrosopumilus		3.27856	0	-
p__Crenarchaeota.c__Thermoprotei.o__Desulfurococcales.f__Pyrodictiaceae.g__Hyperthermus		0.931279	0	-
p__Euryarchaeota.c__Halobacteria.o__Natrialbales.f__Natrialbaceae.g__Natronolimnohabitans		1.78842	0	-
p__Euryarchaeota.c__Archaeoglobi.o__Archaeoglobales		2.91796	0	-
p__Euryarchaeota.c__Methanomicrobia.o__Methanomicrobiales.f__Methanomicrobiaceae.g__Methanogenium		2.026	0	-
p__Crenarchaeota.c__Thermoprotei.o__Thermoproteales.f__Thermofilaceae		2.65401	0	-
p__Euryarchaeota.c__Methanomicrobia.o__Methanosarcinales.f__Methanosarcinaceae.g__Methanomethylovorans		2.56435	0	-
p__Candidatus_Parvarchaeota.c__unclassified_p__Candidatus_Parvarchaeota.o__unclassified_p__Candidatus_Parvarchaeota.f__unclassified_p__Candidatus_Parvarchaeota.g__Candidatus_Parvarchaeum		0.233208	0	-
p__Euryarchaeota.c__Thermococci.o__Thermococcales.f__Thermococcaceae		2.98731	0	-
p__Euryarchaeota.c__Methanonatronarchaeia		1.15809	0	-
p__Euryarchaeota.c__Methanopyri.o__Methanopyrales		1.21016	0	-
p__Thaumarchaeota.c__unclassified_p__Thaumarchaeota.o__Nitrosopumilales.f__Nitrosopumilaceae		3.62616	0	-
p__Candidatus_Diapherotrites.c__unclassified_p__Candidatus_Diapherotrites.o__unclassified_p__Candidatus_Diapherotrites.f__unclassified_p__Candidatus_Diapherotrites.g__unclassified_p__Candidatus_Diapherotrites		2.74389	0	-
p__Euryarchaeota.c__Archaeoglobi.o__Archaeoglobales.f__unclassified_o__Archaeoglobales		2.544	0	-
p__Thaumarchaeota.c__Nitrososphaeria.o__unclassified_c__Nitrososphaeria.f__unclassified_c__Nitrososphaeria.g__unclassified_c__Nitrososphaeria		3.05939	0	-
p__Euryarchaeota.c__Methanomicrobia.o__Methanomicrobiales.f__Methanospirillaceae		4.76326	0	-
p__Thaumarchaeota.c__unclassified_p__Thaumarchaeota.o__unclassified_p__Thaumarchaeota.f__unclassified_p__Thaumarchaeota.g__Candidatus_Nitrosotalea		3.58221	0	-
p__Euryarchaeota.c__Candidatus_Poseidoniia.o__Candidatus_Poseidoniales.f__Candidatus_Thalassarchaeaceae		1.0646	0	-
p__Euryarchaeota.c__Methanococci		3.12042	0	-
p__Crenarchaeota.c__Thermoprotei.o__Thermoproteales.f__Thermoproteaceae.g__Caldivirga		0.904022	0	-
p__Euryarchaeota.c__Halobacteria.o__Halobacteriales.f__unclassified_o__Halobacteriales.g__Salinibaculum		0.681946	0	-
p__Crenarchaeota.c__Thermoprotei.o__Sulfolobales.f__Sulfolobaceae.g__Acidianus		1.45052	0	-
p__Crenarchaeota.c__Thermoprotei.o__Sulfolobales.f__Sulfolobaceae.g__Sulfurisphaera		1.43487	0	-
p__Euryarchaeota.c__Halobacteria.o__Natrialbales.f__Natrialbaceae.g__Natrarchaeobius		2.08768	0	-
p__Euryarchaeota.c__Halobacteria.o__Halobacteriales.f__Haloarculaceae.g__unclassified_f__Haloarculaceae		1.94159	0	-
p__Candidatus_Korarchaeota.c__unclassified_p__Candidatus_Korarchaeota		3.07822	0	-
p__Candidatus_Huberarchaea.c__unclassified_p__Candidatus_Huberarchaea.o__unclassified_p__Candidatus_Huberarchaea.f__unclassified_p__Candidatus_Huberarchaea.g__Candidatus_Huberarchaeum		0.924381	0	-
p__Candidatus_Korarchaeota.c__unclassified_p__Candidatus_Korarchaeota.o__unclassified_p__Candidatus_Korarchaeota.f__unclassified_p__Candidatus_Korarchaeota.g__Candidatus_Korarchaeum		1.24543	0	-
p__Candidatus_Verstraetearchaeota.c__Candidatus_Methanomethylia.o__Candidatus_Methanomethyliales.f__Candidatus_Methanomethyliaceae.g__Candidatus_Methanosuratus		2.22747	0	-
p__Nanoarchaeota.c__unclassified_p__Nanoarchaeota.o__Nanoarchaeales.f__unclassified_o__Nanoarchaeales		1.29384	0	-
p__Crenarchaeota.c__Thermoprotei.o__Acidilobales		2.16964	0	-
p__Candidatus_Verstraetearchaeota.c__unclassified_p__Candidatus_Verstraetearchaeota.o__unclassified_p__Candidatus_Verstraetearchaeota.f__unclassified_p__Candidatus_Verstraetearchaeota		2.4807	0	-
p__Candidatus_Lokiarchaeota.c__unclassified_p__Candidatus_Lokiarchaeota		3.1469	0	-
p__Euryarchaeota.c__Candidatus_Methanoliparia.o__Candidatus_Methanoliparales		2.37168	0	-
p__Euryarchaeota.c__Halobacteria.o__Halobacteriales.f__Halococcaceae.g__Halococcus		2.36791	0	-
p__Crenarchaeota.c__Thermoprotei.o__Acidilobales.f__Acidilobaceae.g__Acidilobus		1.48108	0	-
p__Candidatus_Odinarchaeota		1.46047	0	-
p__Candidatus_Lokiarchaeota.c__unclassified_p__Candidatus_Lokiarchaeota.o__unclassified_p__Candidatus_Lokiarchaeota.f__unclassified_p__Candidatus_Lokiarchaeota.g__Candidatus_Prometheoarchaeum		1.93039	0	-
p__Candidatus_Woesearchaeota.c__unclassified_p__Candidatus_Woesearchaeota.o__unclassified_p__Candidatus_Woesearchaeota.f__unclassified_p__Candidatus_Woesearchaeota		3.50137	0	-
p__Crenarchaeota.c__Thermoprotei.o__Thermoproteales.f__Thermofilaceae.g__Thermofilum		2.65401	0	-
p__Euryarchaeota.c__Halobacteria.o__Haloferacales.f__Halorubraceae.g__Halorubrum		2.60033	0	-
p__Euryarchaeota.c__Halobacteria.o__Halobacteriales.f__Halobacteriaceae.g__Halarchaeum		1.70621	0	-
p__Thaumarchaeota.c__Nitrososphaeria.o__unclassified_c__Nitrososphaeria		3.05939	0	-
p__Candidatus_Huberarchaea		0.924381	0	-
p__Euryarchaeota.c__Halobacteria.o__Haloferacales.f__Halorubraceae.g__Salinigranum		2.63511	0	-
p__Candidatus_Odinarchaeota.c__unclassified_p__Candidatus_Odinarchaeota.o__unclassified_p__Candidatus_Odinarchaeota		1.46047	0	-
p__Euryarchaeota.c__Methanobacteria.o__Methanobacteriales.f__Methanobacteriaceae.g__Methanobrevibacter		2.55534	0	-
p__Crenarchaeota.c__Thermoprotei.o__Desulfurococcales.f__Desulfurococcaceae.g__unclassified_f__Desulfurococcaceae		2.0745	0	-
p__Candidatus_Thorarchaeota		3.33865	0	-
p__Nanoarchaeota.c__unclassified_p__Nanoarchaeota.o__unclassified_p__Nanoarchaeota.f__unclassified_p__Nanoarchaeota		2.81298	0	-
p__Candidatus_Hydrothermarchaeota		1.87734	0	-
p__Euryarchaeota.c__Methanomicrobia.o__Methanosarcinales.f__Methermicoccaceae		1.90095	0	-
p__Candidatus_Odinarchaeota.c__unclassified_p__Candidatus_Odinarchaeota.o__unclassified_p__Candidatus_Odinarchaeota.f__unclassified_p__Candidatus_Odinarchaeota		1.46047	0	-
p__Euryarchaeota.c__Halobacteria.o__Halobacteriales.f__Halobacteriaceae.g__Halobacterium		2.01543	0	-
p__Euryarchaeota.c__Methanomicrobia.o__Methanosarcinales.f__Methanosarcinaceae.g__Methanimicrococcus		0.227184	0	-
p__Crenarchaeota.c__Thermoprotei.o__Acidilobales.f__Caldisphaeraceae		1.51648	0	-
p__Candidatus_Heimdallarchaeota.c__unclassified_p__Candidatus_Heimdallarchaeota.o__unclassified_p__Candidatus_Heimdallarchaeota.f__unclassified_p__Candidatus_Heimdallarchaeota		2.94769	0	-
p__Candidatus_Verstraetearchaeota.c__unclassified_p__Candidatus_Verstraetearchaeota.o__unclassified_p__Candidatus_Verstraetearchaeota.f__unclassified_p__Candidatus_Verstraetearchaeota.g__unclassified_p__Candidatus_Verstraetearchaeota		2.4807	0	-
p__Euryarchaeota.c__Halobacteria.o__Haloferacales.f__Haloferacaceae.g__Haloferax		2.86635	0	-
p__Euryarchaeota.c__Methanococci.o__unclassified_c__Methanococci		0.47182	0	-
p__Candidatus_Geothermarchaeota.c__unclassified_p__Candidatus_Geothermarchaeota.o__unclassified_p__Candidatus_Geothermarchaeota.f__unclassified_p__Candidatus_Geothermarchaeota.g__unclassified_p__Candidatus_Geothermarchaeota		1.79232	0	-
p__Euryarchaeota.c__Thermoplasmata.o__Thermoplasmatales.f__Thermoplasmataceae.g__Thermoplasma		1.45088	0	-
p__Euryarchaeota.c__Thermococci.o__Thermococcales		2.98731	0	-
p__Euryarchaeota.c__Methanomicrobia.o__Methanomicrobiales.f__Methanospirillaceae.g__Methanospirillum		4.76326	0	-
p__Euryarchaeota.c__Methanomicrobia.o__unclassified_c__Methanomicrobia		2.47335	0	-
p__Euryarchaeota.c__Methanococci.o__Methanococcales.f__Methanocaldococcaceae.g__Methanocaldococcus		2.3397	0	-
p__Euryarchaeota.c__Halobacteria.o__Haloferacales.f__Halorubraceae.g__Halonotius		1.85642	0	-
p__Euryarchaeota.c__Halobacteria.o__Natrialbales.f__Natrialbaceae.g__Salinarchaeum		1.59862	0	-
p__Euryarchaeota.c__Methanopyri.o__Methanopyrales.f__Methanopyraceae.g__Methanopyrus		1.21016	0	-
p__Euryarchaeota.c__Hadesarchaea		2.91692	0	-
p__Candidatus_Nezhaarchaeota		1.11416	0	-
p__Thaumarchaeota.c__unclassified_p__Thaumarchaeota.o__unclassified_p__Thaumarchaeota.f__unclassified_p__Thaumarchaeota.g__Candidatus_Nitrosopelagicus		2.41596	0	-
p__Euryarchaeota.c__Halobacteria.o__Halobacteriales.f__unclassified_o__Halobacteriales		3.05773	0	-
p__Euryarchaeota.c__Thermoplasmata.o__Methanomassiliicoccales.f__Methanomassiliicoccaceae.g__Candidatus_Methanoplasma		0.70771	0	-
p__Candidatus_Korarchaeota		3.07822	0	-
p__Candidatus_Thorarchaeota.c__unclassified_p__Candidatus_Thorarchaeota		3.33865	0	-
p__Euryarchaeota.c__Methanomicrobia.o__unclassified_c__Methanomicrobia.f__unclassified_c__Methanomicrobia.g__unclassified_c__Methanomicrobia		2.47335	0	-
p__Euryarchaeota.c__Halobacteria.o__Natrialbales.f__Natrialbaceae.g__Halobiforma		1.52276	0	-
p__Euryarchaeota.c__Halobacteria.o__Halobacteriales.f__Haloarculaceae.g__Halapricum		1.77005	0	-
p__Crenarchaeota.c__Thermoprotei.o__Sulfolobales.f__unclassified_o__Sulfolobales.g__unclassified_o__Sulfolobales		1.94156	0	-
p__Euryarchaeota.c__Methanomicrobia.o__Methanomicrobiales.f__Methanomicrobiaceae.g__Methanofollis		3.1601	0	-
p__Candidatus_Diapherotrites.c__unclassified_p__Candidatus_Diapherotrites.o__unclassified_p__Candidatus_Diapherotrites		2.74389	0	-
p__Euryarchaeota.c__Methanonatronarchaeia.o__Methanonatronarchaeales		0.938749	0	-
p__Euryarchaeota.c__Halobacteria.o__Haloferacales.f__unclassified_o__Haloferacales.g__Halalkaliarchaeum		1.11682	0	-
p__Euryarchaeota.c__Halobacteria.o__Haloferacales.f__Halorubraceae		3.03043	0	-
p__Euryarchaeota.c__Thermococci.o__Thermococcales.f__Thermococcaceae.g__Thermococcus		2.7636	0	-
p__Euryarchaeota.c__Methanomicrobia.o__Methanosarcinales.f__Methanosarcinaceae.g__Methanohalophilus		2.38833	0	-
p__Candidatus_Aenigmarchaeota.c__unclassified_p__Candidatus_Aenigmarchaeota.o__unclassified_p__Candidatus_Aenigmarchaeota		3.2462	0	-
p__Euryarchaeota.c__Methanomicrobia.o__Methanomicrobiales.f__Methanomicrobiaceae.g__Methanoculleus		3.70325	0	-
p__Euryarchaeota.c__Thermococci.o__unclassified_c__Thermococci.f__unclassified_c__Thermococci		2.71322	0	-
p__Euryarchaeota.c__Halobacteria.o__Haloferacales.f__Halorubraceae.g__Haloparvum		1.66794	0	-
p__Candidatus_Verstraetearchaeota		2.73367	0	-
p__Euryarchaeota.c__Methanomicrobia.o__Methanosarcinales.f__unclassified_o__Methanosarcinales		3.71939	0	-
p__Euryarchaeota.c__Candidatus_Poseidoniia.o__unclassified_c__Candidatus_Poseidoniia.f__unclassified_c__Candidatus_Poseidoniia.g__unclassified_c__Candidatus_Poseidoniia		1.71641	0	-
p__Candidatus_Nezhaarchaeota.c__unclassified_p__Candidatus_Nezhaarchaeota.o__unclassified_p__Candidatus_Nezhaarchaeota		1.11416	0	-
p__Euryarchaeota.c__Halobacteria.o__Haloferacales.f__Haloferacaceae.g__Halegenticoccus		2.24685	0	-
p__Euryarchaeota.c__Hadesarchaea.o__unclassified_c__Hadesarchaea.f__unclassified_c__Hadesarchaea		2.91692	0	-
p__Candidatus_Aenigmarchaeota.c__unclassified_p__Candidatus_Aenigmarchaeota.o__unclassified_p__Candidatus_Aenigmarchaeota.f__unclassified_p__Candidatus_Aenigmarchaeota		3.2462	0	-
p__Euryarchaeota.c__Thermococci		3.17257	0	-
p__Candidatus_Altiarchaeota		3.08821	0	-
p__Euryarchaeota.c__Thermococci.o__Thermococcales.f__Thermococcaceae.g__Pyrococcus		2.49761	0	-
p__Nanoarchaeota.c__unclassified_p__Nanoarchaeota.o__unclassified_p__Nanoarchaeota.f__unclassified_p__Nanoarchaeota.g__unclassified_p__Nanoarchaeota		2.80848	0	-
p__Candidatus_Odinarchaeota.c__unclassified_p__Candidatus_Odinarchaeota.o__unclassified_p__Candidatus_Odinarchaeota.f__unclassified_p__Candidatus_Odinarchaeota.g__unclassified_p__Candidatus_Odinarchaeota		1.46047	0	-
p__Euryarchaeota.c__Halobacteria.o__Natrialbales.f__Natrialbaceae.g__Natronolimnobius		1.26497	0	-
p__Euryarchaeota.c__Methanomicrobia.o__Methanomicrobiales.f__unclassified_o__Methanomicrobiales.g__unclassified_o__Methanomicrobiales		3.60175	0	-
p__Candidatus_Geothermarchaeota.c__unclassified_p__Candidatus_Geothermarchaeota.o__unclassified_p__Candidatus_Geothermarchaeota		1.8486	0	-
p__Euryarchaeota.c__Methanobacteria.o__Methanobacteriales.f__Methanothermaceae.g__Methanothermus		1.91965	0	-
p__Candidatus_Thorarchaeota.c__unclassified_p__Candidatus_Thorarchaeota.o__unclassified_p__Candidatus_Thorarchaeota.f__unclassified_p__Candidatus_Thorarchaeota.g__unclassified_p__Candidatus_Thorarchaeota		3.33865	0	-
p__Euryarchaeota.c__Halobacteria.o__Halobacteriales.f__Haloarculaceae		2.94736	0	-
p__Euryarchaeota.c__Halobacteria.o__Natrialbales.f__Natrialbaceae.g__Natrarchaeobaculum		1.87762	0	-
p__Candidatus_Micrarchaeota		2.80751	0	-
p__Euryarchaeota.c__Halobacteria.o__Halobacteriales.f__Halobacteriaceae.g__Haloarchaeobius		1.4447	0	-
p__Euryarchaeota.c__Methanococci.o__Methanococcales.f__Methanococcaceae.g__Methanothermococcus		0.844615	0	-
p__Candidatus_Parvarchaeota.c__unclassified_p__Candidatus_Parvarchaeota.o__unclassified_p__Candidatus_Parvarchaeota		0.726539	0	-
p__Euryarchaeota.c__Theionarchaea		3.02339	0	-
p__Euryarchaeota.c__Methanopyri.o__unclassified_c__Methanopyri		1.48693	0	-
p__Crenarchaeota.c__unclassified_p__Crenarchaeota.o__unclassified_p__Crenarchaeota		4.21432	0	-
p__Candidatus_Woesearchaeota.c__unclassified_p__Candidatus_Woesearchaeota.o__unclassified_p__Candidatus_Woesearchaeota		3.50137	0	-
p__Euryarchaeota.c__Methanomicrobia.o__Methanosarcinales.f__Methanosarcinaceae.g__Methanosarcina		4.43321	0	-
p__Thaumarchaeota.c__unclassified_p__Thaumarchaeota.o__Nitrosopumilales.f__Nitrosopumilaceae.g__Nitrosarchaeum		3.0321	0	-
p__Euryarchaeota.c__Methanococci.o__Methanococcales.f__unclassified_o__Methanococcales		2.97603	0	-
p__Euryarchaeota.c__Methanococci.o__Methanococcales.f__Methanocaldococcaceae		2.37869	0	-
p__Euryarchaeota.c__Methanobacteria.o__Methanobacteriales.f__Methanobacteriaceae.g__Methanosphaera		1.45296	0	-
p__Crenarchaeota		4.27063	0	-
p__Euryarchaeota.c__Halobacteria.o__Halobacteriales.f__Halobacteriaceae.g__Halalkalicoccus		1.93836	0	-
p__Crenarchaeota.c__Thermoprotei.o__Sulfolobales.f__Sulfolobaceae.g__Sulfuracidifex		1.42948	0	-
p__Euryarchaeota.c__Nanohaloarchaea		1.3416	0	-
p__Euryarchaeota.c__Halobacteria.o__Haloferacales.f__Haloferacaceae.g__unclassified_f__Haloferacaceae		2.45549	0	-
p__Crenarchaeota.c__Thermoprotei.o__Sulfolobales		2.50703	0	-
p__Crenarchaeota.c__Thermoprotei.o__Desulfurococcales.f__Pyrodictiaceae		1.6682	0	-
p__Candidatus_Altiarchaeota.c__unclassified_p__Candidatus_Altiarchaeota.o__Candidatus_Altiarchaeales		3.08821	0	-
p__Euryarchaeota.c__Methanomicrobia.o__Methanosarcinales.f__Candidatus_Methanoperedenaceae		3.70734	0	-
p__Euryarchaeota.c__Halobacteria.o__Haloferacales		3.48542	0	-
p__Euryarchaeota.c__Nanohaloarchaea.o__unclassified_c__Nanohaloarchaea.f__unclassified_c__Nanohaloarchaea.g__unclassified_c__Nanohaloarchaea		1.3416	0	-
p__Crenarchaeota.c__Thermoprotei.o__Thermoproteales.f__Thermoproteaceae.g__Pyrobaculum		1.81127	0	-
p__Euryarchaeota.c__Archaeoglobi.o__Archaeoglobales.f__Archaeoglobaceae.g__unclassified_f__Archaeoglobaceae		1.76814	0	-
p__Euryarchaeota.c__Methanomicrobia.o__Methanosarcinales.f__Methanosarcinaceae.g__Methanococcoides		2.72402	0	-
p__Candidatus_Lokiarchaeota.c__unclassified_p__Candidatus_Lokiarchaeota.o__unclassified_p__Candidatus_Lokiarchaeota.f__unclassified_p__Candidatus_Lokiarchaeota.g__Lokiarchaeum		1.52841	0	-
p__Euryarchaeota.c__Candidatus_Poseidoniia.o__Candidatus_Poseidoniales.f__Candidatus_Thalassarchaeaceae.g__Candidatus_Thalassarchaeum		1.0646	0	-
p__Euryarchaeota.c__Methanomicrobia.o__Methanophagales		3.27841	0	-
p__Euryarchaeota.c__Methanobacteria.o__Methanobacteriales.f__Methanobacteriaceae.g__Methanothermobacter		3.0062	0	-
p__Nanoarchaeota.c__unclassified_p__Nanoarchaeota.o__Nanoarchaeales.f__Nanopusillaceae.g__Candidatus_Nanopusillus		0.684434	0	-
p__Euryarchaeota.c__Methanonatronarchaeia.o__Methanonatronarchaeales.f__Methanonatronarchaeaceae.g__Candidatus_Methanohalarchaeum		0.938749	0	-
p__Euryarchaeota.c__Halobacteria.o__Halobacteriales.f__Haloarculaceae.g__Halomicroarcula		1.88492	0	-
p__Euryarchaeota.c__Methanomicrobia.o__Methanocellales.f__Methanocellaceae		4.72564	0	-
p__Euryarchaeota.c__Archaeoglobi.o__Archaeoglobales.f__Archaeoglobaceae.g__Archaeoglobus		2.56683	0	-
p__Candidatus_Micrarchaeota.c__unclassified_p__Candidatus_Micrarchaeota.o__unclassified_p__Candidatus_Micrarchaeota.f__unclassified_p__Candidatus_Micrarchaeota.g__unclassified_p__Candidatus_Micrarchaeota		2.78778	0	-
p__Euryarchaeota.c__Candidatus_Poseidoniia.o__unclassified_c__Candidatus_Poseidoniia		1.71641	0	-
p__Euryarchaeota.c__Halobacteria.o__Halobacteriales.f__Haloarculaceae.g__Halorhabdus		1.98178	0	-
p__Candidatus_Hydrothermarchaeota.c__unclassified_p__Candidatus_Hydrothermarchaeota.o__unclassified_p__Candidatus_Hydrothermarchaeota.f__unclassified_p__Candidatus_Hydrothermarchaeota.g__unclassified_p__Candidatus_Hydrothermarchaeota		1.87734	0	-
p__Candidatus_Micrarchaeota.c__unclassified_p__Candidatus_Micrarchaeota.o__unclassified_p__Candidatus_Micrarchaeota.f__unclassified_p__Candidatus_Micrarchaeota.g__Candidatus_Micrarchaeum		1.56058	0	-
p__Euryarchaeota.c__Methanomicrobia.o__Methanomicrobiales.f__Methanocalculaceae.g__Methanocalculus		2.45362	0	-
p__Crenarchaeota.c__Thermoprotei.o__Thermoproteales.f__unclassified_o__Thermoproteales		1.97483	0	-
p__Candidatus_Hydrothermarchaeota.c__unclassified_p__Candidatus_Hydrothermarchaeota.o__unclassified_p__Candidatus_Hydrothermarchaeota.f__unclassified_p__Candidatus_Hydrothermarchaeota		1.87734	0	-
p__Euryarchaeota.c__Methanomicrobia.o__Methanomicrobiales.f__Methanomicrobiaceae.g__Methanolacinia		2.14747	0	-
p__Euryarchaeota.c__Methanomicrobia.o__Methanosarcinales.f__Methanosarcinaceae.g__Methanohalobium		1.74722	0	-
p__Euryarchaeota.c__Halobacteria.o__Halobacteriales.f__Halobacteriaceae.g__Halodesulfurarchaeum		1.62562	0	-
p__Crenarchaeota.c__Thermoprotei.o__Desulfurococcales.f__Pyrodictiaceae.g__Pyrolobus		1.21917	0	-
p__Thaumarchaeota.c__unclassified_p__Thaumarchaeota.o__Cenarchaeales.f__Cenarchaeaceae.g__Cenarchaeum		1.98483	0	-
p__Crenarchaeota.c__Thermoprotei.o__unclassified_c__Thermoprotei.f__unclassified_c__Thermoprotei.g__unclassified_c__Thermoprotei		2.98247	0	-
p__Euryarchaeota.c__Methanopyri.o__Methanopyrales.f__Methanopyraceae		1.21016	0	-
p__Euryarchaeota.c__Thermoplasmata.o__Thermoplasmatales.f__Ferroplasmaceae		1.44768	0	-
p__Candidatus_Lokiarchaeota		3.1469	0	-
p__Euryarchaeota.c__Thermoplasmata.o__unclassified_c__Thermoplasmata.f__unclassified_c__Thermoplasmata		3.52522	0	-
p__Euryarchaeota.c__Nanohaloarchaea.o__unclassified_c__Nanohaloarchaea.f__unclassified_c__Nanohaloarchaea		1.3416	0	-
p__Nanoarchaeota.c__unclassified_p__Nanoarchaeota.o__Nanoarchaeales.f__unclassified_o__Nanoarchaeales.g__unclassified_o__Nanoarchaeales		1.29384	0	-
p__Euryarchaeota.c__Methanomicrobia.o__Methanomicrobiales.f__Methanomicrobiaceae.g__Methanomicrobium		1.29585	0	-
p__Euryarchaeota.c__Methanonatronarchaeia.o__unclassified_c__Methanonatronarchaeia.f__unclassified_c__Methanonatronarchaeia.g__unclassified_c__Methanonatronarchaeia		0.756353	0	-
p__Euryarchaeota.c__Halobacteria.o__Haloferacales.f__Haloferacaceae.g__Haloprofundus		1.96379	0	-
p__Euryarchaeota.c__Halobacteria.o__Halobacteriales.f__Halobacteriaceae.g__Haladaptatus		2.40006	0	-
p__Crenarchaeota.c__Thermoprotei.o__Desulfurococcales		2.52929	0	-
p__Candidatus_Heimdallarchaeota.c__unclassified_p__Candidatus_Heimdallarchaeota		2.94769	0	-
p__Euryarchaeota.c__Halobacteria.o__Halobacteriales.f__Halobacteriaceae.g__unclassified_f__Halobacteriaceae		2.08417	0	-
p__Euryarchaeota.c__Archaeoglobi.o__Archaeoglobales.f__Archaeoglobaceae		2.6844	0	-
p__Euryarchaeota.c__Halobacteria.o__Natrialbales.f__Natrialbaceae.g__Natronococcus		2.32538	0	-
p__Nanoarchaeota.c__unclassified_p__Nanoarchaeota		2.8162	0	-
p__Euryarchaeota.c__Halobacteria.o__Haloferacales.f__Halorubraceae.g__Halopenitus		1.33155	0	-
p__Crenarchaeota.c__Thermoprotei.o__Acidilobales.f__Acidilobaceae		1.48108	0	-
p__Candidatus_Heimdallarchaeota.c__unclassified_p__Candidatus_Heimdallarchaeota.o__unclassified_p__Candidatus_Heimdallarchaeota.f__unclassified_p__Candidatus_Heimdallarchaeota.g__unclassified_p__Candidatus_Heimdallarchaeota		2.94769	0	-
p__Euryarchaeota.c__Halobacteria.o__Halobacteriales.f__Halobacteriaceae.g__Halomarina		1.86858	0	-
p__Candidatus_Geothermarchaeota.c__unclassified_p__Candidatus_Geothermarchaeota.o__unclassified_p__Candidatus_Geothermarchaeota.f__unclassified_p__Candidatus_Geothermarchaeota.g__Conexivisphaera		0.933396	0	-
p__Euryarchaeota.c__Halobacteria.o__Halobacteriales.f__Halobacteriaceae.g__Salinirussus		1.56417	0	-
p__Euryarchaeota.c__Halobacteria.o__Natrialbales.f__Natrialbaceae.g__Halopiger		2.36895	0	-
p__Euryarchaeota.c__Candidatus_Methanofastidiosa.o__unclassified_c__Candidatus_Methanofastidiosa.f__unclassified_c__Candidatus_Methanofastidiosa		2.9717	0	-
p__Thaumarchaeota.c__unclassified_p__Thaumarchaeota.o__unclassified_p__Thaumarchaeota.f__unclassified_p__Thaumarchaeota.g__Candidatus_Nitrosotenuis		3.45143	0	-
p__Euryarchaeota.c__Halobacteria.o__Natrialbales.f__Natrialbaceae.g__Natrinema		2.35267	0	-
p__Candidatus_Lokiarchaeota.c__unclassified_p__Candidatus_Lokiarchaeota.o__unclassified_p__Candidatus_Lokiarchaeota		3.1469	0	-
p__Candidatus_Altiarchaeota.c__unclassified_p__Candidatus_Altiarchaeota.o__Candidatus_Altiarchaeales.f__unclassified_o__Candidatus_Altiarchaeales.g__unclassified_o__Candidatus_Altiarchaeales		3.07192	0	-
p__Euryarchaeota.c__Methanomicrobia.o__Methanosarcinales.f__unclassified_o__Methanosarcinales.g__Candidatus_Argoarchaeum		2.32781	0	-
p__Candidatus_Woesearchaeota.c__unclassified_p__Candidatus_Woesearchaeota		3.50137	0	-
p__Candidatus_Aenigmarchaeota		3.2462	0	-
p__Euryarchaeota.c__Halobacteria.o__Haloferacales.f__Haloferacaceae.g__Halogranum		2.42805	0	-
p__Euryarchaeota.c__Methanomicrobia.o__Methanophagales.f__unclassified_o__Methanophagales.g__unclassified_o__Methanophagales		3.27841	0	-
p__Candidatus_Verstraetearchaeota.c__Candidatus_Methanomethylia.o__Candidatus_Methanomethyliales		2.40006	0	-
p__Euryarchaeota.c__Methanopyri.o__unclassified_c__Methanopyri.f__unclassified_c__Methanopyri.g__unclassified_c__Methanopyri		1.48693	0	-
p__Euryarchaeota.c__Methanococci.o__Methanococcales		3.12042	0	-
p__Euryarchaeota.c__Halobacteria.o__Haloferacales.f__Halorubraceae.g__Candidatus_Halobonum		0.688678	0	-
p__Candidatus_Huberarchaea.c__unclassified_p__Candidatus_Huberarchaea.o__unclassified_p__Candidatus_Huberarchaea		0.924381	0	-
p__Euryarchaeota.c__Halobacteria.o__Natrialbales.f__Natrialbaceae.g__Halostagnicola		1.86024	0	-
p__Nanoarchaeota.c__unclassified_p__Nanoarchaeota.o__Nanoarchaeales		1.29384	0	-
p__Euryarchaeota.c__Halobacteria.o__Haloferacales.f__Halorubraceae.g__Halohasta		1.49591	0	-
p__unclassified_d__Archaea		4.58675	0	-
p__Candidatus_Geothermarchaeota.c__unclassified_p__Candidatus_Geothermarchaeota.o__unclassified_p__Candidatus_Geothermarchaeota.f__unclassified_p__Candidatus_Geothermarchaeota		1.8486	0	-
p__Candidatus_Hydrothermarchaeota.c__unclassified_p__Candidatus_Hydrothermarchaeota		1.87734	0	-
p__Crenarchaeota.c__Thermoprotei.o__Desulfurococcales.f__Desulfurococcaceae		2.33514	0	-
p__Crenarchaeota.c__Thermoprotei.o__Desulfurococcales.f__Pyrodictiaceae.g__Pyrodictium		1.35154	0	-
p__Candidatus_Marsarchaeota.c__unclassified_p__Candidatus_Marsarchaeota.o__unclassified_p__Candidatus_Marsarchaeota		1.94755	0	-
p__Candidatus_Korarchaeota.c__unclassified_p__Candidatus_Korarchaeota.o__unclassified_p__Candidatus_Korarchaeota.f__unclassified_p__Candidatus_Korarchaeota.g__unclassified_p__Candidatus_Korarchaeota		3.05636	0	-
p__Euryarchaeota.c__Halobacteria.o__Halobacteriales.f__Halobacteriaceae.g__Halorussus		2.60728	0	-
p__unclassified_d__Archaea.c__unclassified_d__Archaea.o__unclassified_d__Archaea		4.58675	0	-
p__Thaumarchaeota.c__unclassified_p__Thaumarchaeota.o__Nitrosopumilales.f__Nitrosopumilaceae.g__unclassified_f__Nitrosopumilaceae		3.08419	0	-
p__Thaumarchaeota.c__unclassified_p__Thaumarchaeota.o__Cenarchaeales.f__Cenarchaeaceae		1.98483	0	-
p__Euryarchaeota.c__Halobacteria.o__Natrialbales.f__Natrialbaceae.g__Natrialba		2.08783	0	-
p__unclassified_d__Archaea.c__unclassified_d__Archaea.o__unclassified_d__Archaea.f__unclassified_d__Archaea.g__unclassified_d__Archaea		4.58675	0	-
p__Euryarchaeota.c__Halobacteria.o__Halobacteriales.f__Haloarculaceae.g__Haloarcula		2.24612	0	-
p__Thaumarchaeota.c__Nitrososphaeria.o__Nitrososphaerales.f__unclassified_o__Nitrososphaerales		3.70023	0	-
p__Euryarchaeota.c__Halobacteria.o__Haloferacales.f__Halorubraceae.g__Halolamina		1.94147	0	-
p__Euryarchaeota.c__Methanomicrobia.o__Methanosarcinales.f__Methanosarcinaceae.g__unclassified_f__Methanosarcinaceae		2.59317	0	-
p__Euryarchaeota.c__Methanococci.o__Methanococcales.f__Methanococcaceae		2.35425	0	-
p__Crenarchaeota.c__Thermoprotei.o__Desulfurococcales.f__Desulfurococcaceae.g__Ignicoccus		1.61059	0	-
p__Candidatus_Geothermarchaeota		1.8486	0	-
p__Euryarchaeota.c__Methanomicrobia.o__Methanosarcinales.f__Methermicoccaceae.g__Methermicoccus		1.90095	0	-
p__Euryarchaeota.c__Methanomicrobia.o__Methanocellales		4.72564	0	-
p__Candidatus_Micrarchaeota.c__unclassified_p__Candidatus_Micrarchaeota.o__unclassified_p__Candidatus_Micrarchaeota.f__unclassified_p__Candidatus_Micrarchaeota.g__Candidatus_Mancarchaeum		0.966984	0	-
p__Crenarchaeota.c__Thermoprotei.o__Acidilobales.f__unclassified_o__Acidilobales.g__unclassified_o__Acidilobales		1.9587	0	-
p__Crenarchaeota.c__Thermoprotei.o__Thermoproteales.f__unclassified_o__Thermoproteales.g__unclassified_o__Thermoproteales		1.97483	0	-
p__Euryarchaeota.c__Methanomicrobia.o__Methanomicrobiales.f__Methanoregulaceae.g__Methanosphaerula		3.71484	0	-
p__Euryarchaeota.c__Methanomicrobia.o__Methanomicrobiales.f__Methanomicrobiaceae		3.83714	0	-
p__Euryarchaeota.c__Halobacteria.o__Halobacteriales.f__Halobacteriaceae.g__Halorubellus		1.46779	0	-
p__Thaumarchaeota.c__Nitrososphaeria.o__Candidatus_Nitrosocaldales.f__Candidatus_Nitrosocaldaceae.g__Candidatus_Nitrosocaldus		3.01291	0	-
p__Euryarchaeota.c__Halobacteria.o__Halobacteriales.f__Halobacteriaceae.g__Halanaeroarchaeum		1.32217	0	-
p__Euryarchaeota.c__Halobacteria.o__Halobacteriales.f__Halobacteriaceae.g__Natronoarchaeum		1.44483	0	-
p__Euryarchaeota.c__Theionarchaea.o__unclassified_c__Theionarchaea.f__unclassified_c__Theionarchaea		3.02339	0	-
p__Euryarchaeota.c__Thermococci.o__unclassified_c__Thermococci		2.71322	0	-
p__Euryarchaeota.c__Thermococci.o__unclassified_c__Thermococci.f__unclassified_c__Thermococci.g__unclassified_c__Thermococci		2.71322	0	-
p__Euryarchaeota.c__Methanococci.o__Methanococcales.f__Methanocaldococcaceae.g__Methanotorris		1.62358	0	-
p__Candidatus_Geothermarchaeota.c__unclassified_p__Candidatus_Geothermarchaeota		1.8486	0	-
p__Candidatus_Marsarchaeota.c__unclassified_p__Candidatus_Marsarchaeota		1.94755	0	-
p__Euryarchaeota.c__Methanomicrobia.o__Methanosarcinales.f__Candidatus_Methanoperedenaceae.g__Candidatus_Methanoperedens		3.65364	0	-
p__Thaumarchaeota.c__Nitrososphaeria.o__unclassified_c__Nitrososphaeria.f__unclassified_c__Nitrososphaeria		3.05939	0	-
p__Euryarchaeota.c__Halobacteria.o__Haloferacales.f__Haloferacaceae.g__Haloquadratum		1.15776	0	-
p__Crenarchaeota.c__Thermoprotei.o__Sulfolobales.f__unclassified_o__Sulfolobales		1.94156	0	-
p__Euryarchaeota.c__Halobacteria.o__Haloferacales.f__Haloferacaceae.g__Haloplanus		2.32473	0	-
p__Crenarchaeota.c__Thermoprotei.o__Desulfurococcales.f__unclassified_o__Desulfurococcales		1.97078	0	-
p__Euryarchaeota.c__Thermoplasmata.o__Thermoplasmatales		3.14206	0	-
p__Crenarchaeota.c__Thermoprotei.o__Desulfurococcales.f__Desulfurococcaceae.g__Desulfurococcus		0.417945	0	-
p__Euryarchaeota.c__Halobacteria.o__Natrialbales.f__Natrialbaceae.g__unclassified_f__Natrialbaceae		2.56809	0	-
p__Candidatus_Verstraetearchaeota.c__Candidatus_Methanomethylia.o__Candidatus_Methanomethyliales.f__Candidatus_Methanomethyliaceae.g__unclassified_f__Candidatus_Methanomethyliaceae		1.05331	0	-
p__Nanoarchaeota.c__unclassified_p__Nanoarchaeota.o__unclassified_p__Nanoarchaeota		2.81298	0	-
p__Euryarchaeota.c__Halobacteria.o__Halobacteriales.f__unclassified_o__Halobacteriales.g__unclassified_o__Halobacteriales		3.05773	0	-
p__Candidatus_Verstraetearchaeota.c__Candidatus_Methanomethylia.o__Candidatus_Methanomethyliales.f__Candidatus_Methanomethyliaceae		2.40006	0	-
p__Crenarchaeota.c__Thermoprotei.o__Sulfolobales.f__Sulfolobaceae		2.4479	0	-
p__Euryarchaeota.c__Archaeoglobi.o__Archaeoglobales.f__Archaeoglobaceae.g__Geoglobus		1.78185	0	-
p__Euryarchaeota.c__Methanopyri		1.67126	0	-
p__Candidatus_Thorarchaeota.c__unclassified_p__Candidatus_Thorarchaeota.o__unclassified_p__Candidatus_Thorarchaeota.f__unclassified_p__Candidatus_Thorarchaeota		3.33865	0	-
p__Euryarchaeota.c__Candidatus_Methanoliparia		2.37168	0	-
p__Candidatus_Thorarchaeota.c__unclassified_p__Candidatus_Thorarchaeota.o__unclassified_p__Candidatus_Thorarchaeota		3.33865	0	-
p__Euryarchaeota.c__Methanomicrobia.o__Methanosarcinales.f__Methanosarcinaceae		4.46313	0	-
p__Candidatus_Verstraetearchaeota.c__Candidatus_Methanomethylia.o__Candidatus_Methanomethyliales.f__Candidatus_Methanomethyliaceae.g__Candidatus_Methanomethylicus		1.93067	0	-
p__Nanoarchaeota.c__unclassified_p__Nanoarchaeota.o__Nanoarchaeales.f__Nanopusillaceae		0.684434	0	-
p__Euryarchaeota.c__Methanomicrobia.o__Methanocellales.f__Methanocellaceae.g__Methanocella		4.72564	0	-
p__Candidatus_Woesearchaeota		3.50137	0	-
p__Euryarchaeota.c__Candidatus_Methanofastidiosa.o__unclassified_c__Candidatus_Methanofastidiosa.f__unclassified_c__Candidatus_Methanofastidiosa.g__Candidatus_Methanofastidiosum		2.69637	0	-
p__Euryarchaeota.c__Methanomicrobia.o__Methanomicrobiales.f__Methanocorpusculaceae.g__Methanocorpusculum		2.06835	0	-
p__Euryarchaeota.c__Halobacteria.o__Haloferacales.f__Haloferacaceae.g__Halogeometricum		2.13057	0	-
p__Euryarchaeota.c__Methanomicrobia.o__Methanosarcinales.f__Candidatus_Methanoperedenaceae.g__unclassified_f__Candidatus_Methanoperedenaceae		2.773	0	-
p__Euryarchaeota.c__Theionarchaea.o__unclassified_c__Theionarchaea.f__unclassified_c__Theionarchaea.g__unclassified_c__Theionarchaea		3.02339	0	-
p__Candidatus_Micrarchaeota.c__unclassified_p__Candidatus_Micrarchaeota		2.80751	0	-
p__Crenarchaeota.c__Thermoprotei.o__Sulfolobales.f__Sulfolobaceae.g__Metallosphaera		1.90033	0	-
p__Euryarchaeota.c__Methanomicrobia.o__Methanosarcinales.f__unclassified_o__Methanosarcinales.g__Candidatus_Syntrophoarchaeum		2.27818	0	-
p__Euryarchaeota.c__Theionarchaea.o__unclassified_c__Theionarchaea		3.02339	0	-
p__Euryarchaeota.c__Halobacteria.o__Natrialbales.f__Natrialbaceae.g__Haloterrigena		2.49543	0	-
p__Candidatus_Nezhaarchaeota.c__unclassified_p__Candidatus_Nezhaarchaeota.o__unclassified_p__Candidatus_Nezhaarchaeota.f__unclassified_p__Candidatus_Nezhaarchaeota		1.11416	0	-
p__Euryarchaeota.c__Hadesarchaea.o__unclassified_c__Hadesarchaea		2.91692	0	-
p__Euryarchaeota.c__Nanohaloarchaea.o__unclassified_c__Nanohaloarchaea		1.3416	0	-
p__Euryarchaeota.c__Methanomicrobia.o__Methanomicrobiales.f__Methanocorpusculaceae		2.06835	0	-
p__Crenarchaeota.c__Thermoprotei.o__Thermoproteales		2.90798	0	-
p__Euryarchaeota.c__Methanomicrobia.o__Methanomicrobiales.f__Methanoregulaceae.g__Methanolinea		2.80026	0	-
p__Euryarchaeota.c__Candidatus_Methanofastidiosa		2.9717	0	-
p__Crenarchaeota.c__unclassified_p__Crenarchaeota.o__unclassified_p__Crenarchaeota.f__unclassified_p__Crenarchaeota.g__unclassified_p__Crenarchaeota		4.21432	0	-
p__Candidatus_Aenigmarchaeota.c__unclassified_p__Candidatus_Aenigmarchaeota		3.2462	0	-
p__Candidatus_Huberarchaea.c__unclassified_p__Candidatus_Huberarchaea		0.924381	0	-
p__Crenarchaeota.c__Thermoprotei.o__Thermoproteales.f__Thermoproteaceae		2.45676	0	-
p__Crenarchaeota.c__Thermoprotei		3.41828	0	-
p__Euryarchaeota.c__Thermoplasmata		4.07393	0	-
p__Nanoarchaeota		2.8162	0	-
p__Euryarchaeota.c__Methanonatronarchaeia.o__Methanonatronarchaeales.f__Methanonatronarchaeaceae		0.938749	0	-
p__Candidatus_Odinarchaeota.c__unclassified_p__Candidatus_Odinarchaeota		1.46047	0	-
p__Euryarchaeota.c__Halobacteria.o__Halobacteriales.f__Haloarculaceae.g__Halosimplex		2.12521	0	-
p__Euryarchaeota.c__Archaeoglobi.o__unclassified_c__Archaeoglobi		1.25911	0	-
p__Candidatus_Parvarchaeota.c__unclassified_p__Candidatus_Parvarchaeota.o__unclassified_p__Candidatus_Parvarchaeota.f__unclassified_p__Candidatus_Parvarchaeota.g__unclassified_p__Candidatus_Parvarchaeota		0.558332	0	-
p__Euryarchaeota.c__Methanomicrobia.o__Methanosarcinales.f__unclassified_o__Methanosarcinales.g__unclassified_o__Methanosarcinales		3.68722	0	-
p__Euryarchaeota.c__Methanomicrobia.o__Methanomicrobiales.f__Methanoregulaceae		3.98913	0	-
p__Candidatus_Hydrothermarchaeota.c__unclassified_p__Candidatus_Hydrothermarchaeota.o__unclassified_p__Candidatus_Hydrothermarchaeota		1.87734	0	-
p__Euryarchaeota.c__Candidatus_Methanoliparia.o__Candidatus_Methanoliparales.f__Candidatus_Methanollivieraceae		2.37168	0	-
p__Crenarchaeota.c__Thermoprotei.o__Thermoproteales.f__Thermoproteaceae.g__Thermocladium		1.07099	0	-
p__Euryarchaeota.c__Candidatus_Methanofastidiosa.o__unclassified_c__Candidatus_Methanofastidiosa.f__unclassified_c__Candidatus_Methanofastidiosa.g__unclassified_c__Candidatus_Methanofastidiosa		2.64335	0	-
p__Crenarchaeota.c__Thermoprotei.o__Thermoproteales.f__Thermoproteaceae.g__Thermoproteus		1.6908	0	-
p__Crenarchaeota.c__Thermoprotei.o__Fervidicoccales.f__Fervidicoccaceae.g__Fervidicoccus		1.68195	0	-
p__Euryarchaeota.c__Methanomicrobia.o__Methanomicrobiales.f__unclassified_o__Methanomicrobiales		3.60175	0	-
p__Euryarchaeota.c__Halobacteria.o__Halobacteriales		3.54345	0	-
p__Euryarchaeota.c__Methanobacteria.o__Methanobacteriales.f__Methanothermaceae		1.91965	0	-
p__Crenarchaeota.c__Thermoprotei.o__Fervidicoccales		1.68195	0	-
p__Candidatus_Parvarchaeota		0.726539	0	-
p__Crenarchaeota.c__Thermoprotei.o__Acidilobales.f__Caldisphaeraceae.g__Caldisphaera		1.51648	0	-
p__Euryarchaeota.c__Halobacteria.o__Natrialbales.f__Natrialbaceae.g__Saliphagus		2.02111	0	-
p__Euryarchaeota.c__Methanococci.o__Methanococcales.f__unclassified_o__Methanococcales.g__Methanofervidicoccus		2.97603	0	-
p__Euryarchaeota.c__Halobacteria.o__Natrialbales.f__Natrialbaceae.g__Halovivax		1.61222	0	-
p__Candidatus_Altiarchaeota.c__unclassified_p__Candidatus_Altiarchaeota		3.08821	0	-
p__Crenarchaeota.c__Thermoprotei.o__Desulfurococcales.f__Pyrodictiaceae.g__unclassified_f__Pyrodictiaceae		0.677595	0	-
p__Candidatus_Marsarchaeota.c__unclassified_p__Candidatus_Marsarchaeota.o__unclassified_p__Candidatus_Marsarchaeota.f__unclassified_p__Candidatus_Marsarchaeota.g__unclassified_p__Candidatus_Marsarchaeota		1.94755	0	-
p__Candidatus_Woesearchaeota.c__unclassified_p__Candidatus_Woesearchaeota.o__unclassified_p__Candidatus_Woesearchaeota.f__unclassified_p__Candidatus_Woesearchaeota.g__unclassified_p__Candidatus_Woesearchaeota		3.50137	0	-
p__Euryarchaeota.c__Halobacteria.o__Halobacteriales.f__Halobacteriaceae.g__Halostella		2.3178	0	-
p__Crenarchaeota.c__Thermoprotei.o__Desulfurococcales.f__Desulfurococcaceae.g__Ignisphaera		1.68222	0	-
p__Thaumarchaeota.c__unclassified_p__Thaumarchaeota.o__Cenarchaeales		1.98483	0	-
p__Euryarchaeota.c__Candidatus_Poseidoniia.o__unclassified_c__Candidatus_Poseidoniia.f__unclassified_c__Candidatus_Poseidoniia		1.71641	0	-
p__Candidatus_Huberarchaea.c__unclassified_p__Candidatus_Huberarchaea.o__unclassified_p__Candidatus_Huberarchaea.f__unclassified_p__Candidatus_Huberarchaea		0.924381	0	-
p__Euryarchaeota.c__Thermoplasmata.o__unclassified_c__Thermoplasmata.f__unclassified_c__Thermoplasmata.g__unclassified_c__Thermoplasmata		3.52522	0	-
p__Euryarchaeota.c__Halobacteria.o__Haloferacales.f__Halorubraceae.g__Halobaculum		1.74164	0	-
p__Crenarchaeota.c__Thermoprotei.o__Sulfolobales.f__Sulfolobaceae.g__Sulfolobus		2.01355	0	-
p__Euryarchaeota.c__Thermoplasmata.o__unclassified_c__Thermoplasmata		3.52522	0	-
p__Euryarchaeota.c__Thermoplasmata.o__Thermoplasmatales.f__Thermoplasmataceae		1.45088	0	-
p__Crenarchaeota.c__Thermoprotei.o__Desulfurococcales.f__Desulfurococcaceae.g__Staphylothermus		1.17476	0	-
p__Candidatus_Altiarchaeota.c__unclassified_p__Candidatus_Altiarchaeota.o__Candidatus_Altiarchaeales.f__unclassified_o__Candidatus_Altiarchaeales		3.08821	0	-
p__Candidatus_Heimdallarchaeota		2.94769	0	-
p__Crenarchaeota.c__Thermoprotei.o__Acidilobales.f__unclassified_o__Acidilobales		1.9587	0	-
p__Euryarchaeota.c__Halobacteria.o__Halobacteriales.f__Halobacteriaceae		3.1157	0	-
p__Euryarchaeota.c__Methanonatronarchaeia.o__unclassified_c__Methanonatronarchaeia		0.756353	0	-
p__Candidatus_Korarchaeota.c__unclassified_p__Candidatus_Korarchaeota.o__unclassified_p__Candidatus_Korarchaeota.f__unclassified_p__Candidatus_Korarchaeota.g__Candidatus_Methanodesulfokores		1.70048	0	-
p__Candidatus_Marsarchaeota.c__unclassified_p__Candidatus_Marsarchaeota.o__unclassified_p__Candidatus_Marsarchaeota.f__unclassified_p__Candidatus_Marsarchaeota		1.94755	0	-
p__Euryarchaeota.c__Halobacteria.o__Haloferacales.f__Haloferacaceae.g__Halobellus		2.30319	0	-
p__Candidatus_Heimdallarchaeota.c__unclassified_p__Candidatus_Heimdallarchaeota.o__unclassified_p__Candidatus_Heimdallarchaeota		2.94769	0	-
p__Candidatus_Altiarchaeota.c__unclassified_p__Candidatus_Altiarchaeota.o__Candidatus_Altiarchaeales.f__unclassified_o__Candidatus_Altiarchaeales.g__Candidatus_Altiarchaeum		1.76139	0	-
p__Euryarchaeota.c__Methanomicrobia.o__unclassified_c__Methanomicrobia.f__unclassified_c__Methanomicrobia		2.47335	0	-
p__Euryarchaeota.c__Halobacteria.o__Halobacteriales.f__Haloarculaceae.g__Natronomonas		2.07466	0	-
p__Crenarchaeota.c__unclassified_p__Crenarchaeota.o__unclassified_p__Crenarchaeota.f__unclassified_p__Crenarchaeota		4.21432	0	-
p__Crenarchaeota.c__Thermoprotei.o__Thermoproteales.f__Thermoproteaceae.g__Vulcanisaeta		2.24633	0	-
p__Crenarchaeota.c__Thermoprotei.o__Desulfurococcales.f__Desulfurococcaceae.g__Thermosphaera		0.959409	0	-
p__Euryarchaeota.c__Archaeoglobi.o__unclassified_c__Archaeoglobi.f__unclassified_c__Archaeoglobi		1.25911	0	-
p__Thaumarchaeota.c__Nitrososphaeria.o__Nitrososphaerales.f__unclassified_o__Nitrososphaerales.g__unclassified_o__Nitrososphaerales		3.70023	0	-
p__Candidatus_Marsarchaeota		1.94755	0	-
p__Euryarchaeota.c__Halobacteria.o__Natrialbales.f__Natrialbaceae.g__Natronorubrum		2.1563	0	-
p__Candidatus_Micrarchaeota.c__unclassified_p__Candidatus_Micrarchaeota.o__unclassified_p__Candidatus_Micrarchaeota.f__unclassified_p__Candidatus_Micrarchaeota		2.80751	0	-
p__Euryarchaeota.c__Archaeoglobi.o__Archaeoglobales.f__unclassified_o__Archaeoglobales.g__unclassified_o__Archaeoglobales		2.544	0	-
p__Euryarchaeota.c__Thermoplasmata.o__Thermoplasmatales.f__Ferroplasmaceae.g__Ferroplasma		1.44768	0	-
p__Euryarchaeota.c__Halobacteria.o__Halobacteriales.f__Halobacteriaceae.g__Salarchaeum		1.12983	0	-
p__Euryarchaeota.c__Methanomicrobia.o__Methanomicrobiales		4.89764	0	-
p__Euryarchaeota.c__Archaeoglobi		2.91871	0	-
p__Euryarchaeota.c__Hadesarchaea.o__unclassified_c__Hadesarchaea.f__unclassified_c__Hadesarchaea.g__unclassified_c__Hadesarchaea		2.91692	0	-
p__unclassified_d__Archaea.c__unclassified_d__Archaea.o__unclassified_d__Archaea.f__unclassified_d__Archaea		4.58675	0	-
p__Euryarchaeota.c__Methanomicrobia.o__Methanomicrobiales.f__Methanoregulaceae.g__unclassified_f__Methanoregulaceae		3.22615	0	-
p__Candidatus_Verstraetearchaeota.c__unclassified_p__Candidatus_Verstraetearchaeota		2.4807	0	-
p__Euryarchaeota.c__Methanococci.o__unclassified_c__Methanococci.f__unclassified_c__Methanococci		0.47182	0	-
p__Candidatus_Aenigmarchaeota.c__unclassified_p__Candidatus_Aenigmarchaeota.o__unclassified_p__Candidatus_Aenigmarchaeota.f__unclassified_p__Candidatus_Aenigmarchaeota.g__unclassified_p__Candidatus_Aenigmarchaeota		3.2462	0	-
p__Euryarchaeota.c__Halobacteria.o__Halobacteriales.f__Halococcaceae		2.36791	0	-
p__Candidatus_Diapherotrites.c__unclassified_p__Candidatus_Diapherotrites		2.74389	0	-
p__Crenarchaeota.c__Thermoprotei.o__Fervidicoccales.f__Fervidicoccaceae		1.68195	0	-
p__Euryarchaeota.c__Methanomicrobia.o__Methanomicrobiales.f__Methanocalculaceae		2.45362	0	-
p__Crenarchaeota.c__Thermoprotei.o__unclassified_c__Thermoprotei		2.98247	0	-
p__Candidatus_Korarchaeota.c__unclassified_p__Candidatus_Korarchaeota.o__unclassified_p__Candidatus_Korarchaeota.f__unclassified_p__Candidatus_Korarchaeota		3.07822	0	-
p__Crenarchaeota.c__Thermoprotei.o__Desulfurococcales.f__unclassified_o__Desulfurococcales.g__unclassified_o__Desulfurococcales		1.97078	0	-
p__Thaumarchaeota.c__Nitrososphaeria.o__Candidatus_Nitrosocaldales.f__Candidatus_Nitrosocaldaceae		3.01291	0	-
p__Thaumarchaeota.c__unclassified_p__Thaumarchaeota.o__unclassified_p__Thaumarchaeota.f__unclassified_p__Thaumarchaeota.g__Candidatus_Caldiarchaeum		2.05632	0	-
p__Euryarchaeota.c__Halobacteria.o__Haloferacales.f__Haloferacaceae.g__Halopelagius		1.86526	0	-
p__Euryarchaeota.c__Thermococci.o__Thermococcales.f__Thermococcaceae.g__Palaeococcus		1.88359	0	-
p__Euryarchaeota.c__Thermoplasmata.o__Thermoplasmatales.f__unclassified_o__Thermoplasmatales.g__unclassified_o__Thermoplasmatales		3.13178	0	-
p__Crenarchaeota.c__Thermoprotei.o__unclassified_c__Thermoprotei.f__unclassified_c__Thermoprotei		2.98247	0	-
p__Candidatus_Lokiarchaeota.c__unclassified_p__Candidatus_Lokiarchaeota.o__unclassified_p__Candidatus_Lokiarchaeota.f__unclassified_p__Candidatus_Lokiarchaeota		3.1469	0	-
p__Euryarchaeota.c__Methanobacteria.o__Methanobacteriales.f__unclassified_o__Methanobacteriales.g__unclassified_o__Methanobacteriales		3.16127	0	-
p__Candidatus_Parvarchaeota.c__unclassified_p__Candidatus_Parvarchaeota.o__unclassified_p__Candidatus_Parvarchaeota.f__unclassified_p__Candidatus_Parvarchaeota		0.726539	0	-
p__Candidatus_Nezhaarchaeota.c__unclassified_p__Candidatus_Nezhaarchaeota.o__unclassified_p__Candidatus_Nezhaarchaeota.f__unclassified_p__Candidatus_Nezhaarchaeota.g__unclassified_p__Candidatus_Nezhaarchaeota		1.11416	0	-
p__Candidatus_Lokiarchaeota.c__unclassified_p__Candidatus_Lokiarchaeota.o__unclassified_p__Candidatus_Lokiarchaeota.f__unclassified_p__Candidatus_Lokiarchaeota.g__unclassified_p__Candidatus_Lokiarchaeota		3.11381	0	-
