# Supplementary material for: The Inhibiting Effects of High-Dose Biochar Application on Soil Microbial Metagenomics and Rice (Oryza sativa L.) Production
Source: Int J Mol Sci. 2023 Oct 10;24(20):15043. doi: 10.3390/ijms242015043 (PMC10606461; doi:10.3390/ijms242015043)
Supplement: Supplementary file 1 [file ijms-24-15043-s001.zip › Supplementary Table S4.xlsx]

## Sheet: Bacteria
Supplementary Table S4. (a) The Spearman's correlation between soil properties and bacterial genera
Soil properties	Genus	Coefficient	p_value
pH	g__unclassified_p__Chloroflexi	0.899191	0.000969
NO3--N	g__unclassified_p__Chloroflexi	-0.75	0.019942
Available K	g__unclassified_p__Chloroflexi	0.820091	0.006788
pH	g__unclassified_f__Prolixibacteraceae	0.731118	0.025215
pH	g__Caldilinea	0.899191	0.000969
pH	g__Microvirga	0.756329	0.018354
pH	g__Candidatus_Entotheonella	0.823558	0.006363
pH	g__unclassified_o__Gemmatimonadales	0.747926	0.020482
pH	g__unclassified_c__Anaerolineae	0.756329	0.018354
pH	g__unclassified_f__Phyllobacteriaceae	-0.89919	0.000969
pH	g__Rhizobium	-0.75633	0.018354
pH	g__Aromatoleum	-0.75633	0.018354
pH	g__unclassified_p__Gemmatimonadetes_d__Bacteria	0.714311	0.030617
pH	g__unclassified_p__Candidatus_Aminicenantes	0.731118	0.025215
pH	g__Anaerolinea	0.722715	0.02783
pH	g__Mesorhizobium	-0.89079	0.001272
pH	g__unclassified_p__Proteobacteria	-0.73112	0.025215
pH	g__Actinomadura	0.747926	0.020482
pH	g__unclassified_c__Dehalococcoidia	0.739522	0.022768
pH	g__Lysobacter	0.731118	0.025215
NO3--N	g__unclassified_c__Actinobacteria	-0.7	0.03577
NO3--N	g__Nocardioides	0.933333	0.000236
NO3--N	g__unclassified_c__Deltaproteobacteria	-0.91667	0.000507
NO3--N	g__Anaeromyxobacter	-0.76667	0.015944
NO3--N	g__unclassified_p__Actinobacteria	-0.7	0.03577
NO3--N	g__unclassified_c__Alphaproteobacteria	-0.76667	0.015944
NO3--N	g__Phycicoccus	0.866667	0.002495
NO3--N	g__Gaiella	-0.73333	0.024554
NO3--N	g__unclassified_p__Candidatus_Rokubacteria	-0.88333	0.001591
NO3--N	g__Bradyrhizobium	-0.81667	0.007225
NO3--N	g__unclassified_c__Thermoleophilia	-0.7	0.03577
NO3--N	g__Marmoricola	0.916667	0.000507
NO3--N	g__Cellulomonas	0.966667	2.16e-05
NO3--N	g__unclassified_f__Rhodospirillaceae	-0.98333	1.94e-06
NO3--N	g__Microbacterium	0.716667	0.029818
NO3--N	g__Actinomadura	-0.86667	0.002495
NO3--N	g__Desulfobacca	-0.76667	0.015944
NO3--N	g__unclassified_p__Firmicutes	-0.78333	0.01252
NO3--N	g__Terrabacter	0.75	0.019942
NO3--N	g__Rhodoplanes	-0.81667	0.007225
NO3--N	g__Syntrophobacter	-0.75	0.019942
NO3--N	g__unclassified_p__Armatimonadetes	-0.78333	0.01252
NO3--N	g__Candidatus_Entotheonella	-0.85	0.003705
NO3--N	g__unclassified_f__Phyllobacteriaceae	0.75	0.019942
Available K	g__unclassified_c__Betaproteobacteria	-0.87867	0.001816
Available K	g__unclassified_d__Bacteria	0.836827	0.004907
Available K	g__unclassified_c__Gammaproteobacteria	-0.8452	0.004117
Available K	g__unclassified_p__Gemmatimonadetes_d__Bacteria	0.92051	0.000431
Available K	g__unclassified_p__Planctomycetes	0.778249	0.013506
Available K	g__unclassified_p__Proteobacteria	-0.92888	0.000295
Available K	g__unclassified_o__Xanthomonadales	-0.87867	0.001816
Available K	g__unclassified_o__Bacteroidales	0.912142	0.000607
Available K	g__unclassified_f__Prolixibacteraceae	0.945615	0.000117
Available K	g__unclassified_f__Desulfobacteraceae	0.853564	0.003418
Available K	g__unclassified_p__Verrucomicrobia	-0.76151	0.017117
Available K	g__Ornithinibacter	-0.94561	0.000117
Available K	g__Microvirga	0.761513	0.017117
Available K	g__unclassified_f__Acidimicrobiaceae	-0.90377	0.000827
Available K	g__Intrasporangium	-0.87867	0.001816
Available K	g__unclassified_o__Burkholderiales	-0.82846	0.005795
Available K	g__Methyloceanibacter	0.761513	0.017117
Available K	g__unclassified_p__Candidatus_Aminicenantes	0.928878	0.000295
Available K	g__Anaerolinea	0.903774	0.000827
Available K	g__Mesorhizobium	-0.93725	0.000192
Available K	g__Ilumatobacter	-0.80335	0.009106
Available K	g__unclassified_c__Dehalococcoidia	0.861932	0.002806
Available K	g__Lysobacter	0.828459	0.005795
Available K	g__Tetrasphaera	-0.87867	0.001816
Available K	g__unclassified_f__Planctomycetaceae	0.736408	0.023655
Available K	g__unclassified_o__Acidimicrobiales	-0.72804	0.026154
Available K	g__unclassified_p__Firmicutes	0.753145	0.019142
Available K	g__unclassified_o__Desulfobacterales	0.719672	0.028819
Available K	g__Terrabacter	-0.74478	0.02132
Available K	g__Azospirillum	0.744776	0.02132
Available K	g__Syntrophobacter	0.761513	0.017117
Available K	g__Aromatoleum	-0.97909	4.27e-06
Available K	g__unclassified_f__Phyllobacteriaceae	-0.82009	0.006788
Available K	g__Rhizobium	-0.90377	0.000827
Available P	g__unclassified_p__Acidobacteria	-0.75314	0.019142
Available P	g__unclassified_o__Anaerolineales	-0.76151	0.017117
Available P	g__unclassified_p__Nitrospirae	-0.85356	0.003418
Available P	g__Luteitalea	-0.75314	0.019142
OM	g__unclassified_c__Betaproteobacteria	-0.86667	0.002495
OM	g__unclassified_d__Bacteria	0.7	0.03577
OM	g__unclassified_c__Gammaproteobacteria	-0.86667	0.002495
OM	g__unclassified_p__Gemmatimonadetes_d__Bacteria	0.783333	0.01252
OM	g__unclassified_o__Rhizobiales	0.7	0.03577
OM	g__unclassified_p__Proteobacteria	-0.88333	0.001591
OM	g__unclassified_o__Xanthomonadales	-0.88333	0.001591
OM	g__Mycobacterium	0.766667	0.015944
OM	g__Arthrobacter	0.7	0.03577
OM	g__Mycolicibacterium	0.716667	0.029818
OM	g__unclassified_o__Bacteroidales	0.8	0.009628
OM	g__unclassified_f__Prolixibacteraceae	0.866667	0.002495
OM	g__unclassified_f__Desulfobacteraceae	0.733333	0.024554
OM	g__unclassified_p__Verrucomicrobia	-0.81667	0.007225
OM	g__Ornithinibacter	-0.78333	0.01252
OM	g__Microvirga	0.833333	0.005266
OM	g__unclassified_f__Acidimicrobiaceae	-0.73333	0.024554
OM	g__unclassified_o__Gemmatimonadales	0.716667	0.029818
OM	g__unclassified_o__Burkholderiales	-0.88333	0.001591
OM	g__Methyloceanibacter	0.833333	0.005266
OM	g__unclassified_p__Candidatus_Aminicenantes	0.833333	0.005266
OM	g__Anaerolinea	0.816667	0.007225
OM	g__Mesorhizobium	-0.86667	0.002495
OM	g__Ilumatobacter	-0.7	0.03577
OM	g__Rhodococcus_f__Nocardiaceae	0.716667	0.029818
OM	g__unclassified_c__Dehalococcoidia	0.783333	0.01252
OM	g__Lysobacter	0.883333	0.001591
OM	g__Nonomuraea	0.766667	0.015944
OM	g__unclassified_p__Nitrospirae	-0.73333	0.024554
OM	g__Desulfobacca	0.766667	0.015944
OM	g__Azospirillum	0.8	0.009628
OM	g__Caldilinea	0.733333	0.024554
OM	g__Aromatoleum	-0.88333	0.001591
OM	g__unclassified_f__Rhodocyclaceae	-0.76667	0.015944
OM	g__Rhizobium	-0.86667	0.002495
NH4+-N	g__Phycicoccus	-0.71667	0.029818
NH4+-N	g__Sphingomonas	0.85	0.003705
NH4+-N	g__unclassified_c__Blastocatellia	0.8	0.009628
NH4+-N	g__Candidatus_Promineofilum	-0.81667	0.007225
NH4+-N	g__Kribbella	-0.75	0.019942

## Sheet: Archaea
Supplementary Table S4. (b) The Spearman's correlation between soil properties and archaeal genera
Soil properties	Genus	Coefficient	p_value
Available K	g__unclassified_o__Nitrosopumilales	0.778249	0.013506
OM	g__unclassified_o__Nitrosopumilales	0.816667	0.00722479
Available K	g__unclassified_p__Thaumarchaeota	0.845196	0.0041166
Available K	g__Nitrososphaera	0.912142	0.000606851
Available K	g__unclassified_p__Candidatus_Bathyarchaeota	0.953983	6.58e-05
Available K	g__Candidatus_Nitrosocosmicus	0.878669	0.0018158
Available K	g__unclassified_p__Euryarchaeota	0.928878	0.000294526
Available K	g__unclassified_p__Crenarchaeota	0.878669	0.0018158
Available K	g__unclassified_o__Nitrososphaerales	0.861932	0.00280593
Available K	g__Methanoculleus	0.744776	0.0213197
Available K	g__Candidatus_Methanoperedens	0.887037	0.00142602
Available K	g__Candidatus_Nitrosotalea	0.861932	0.00280593
Available K	g__unclassified_c__Thermoplasmata	0.836827	0.00490701
Available K	g__Methanomassiliicoccus	0.903774	0.000827411
Available K	g__Candidatus_Nitrosotenuis	0.811723	0.0078893
Available K	g__unclassified_o__Methanophagales	0.828459	0.00579537
Available K	g__unclassified_p__Candidatus_Thorarchaeota	0.836827	0.00490701
Available K	g__unclassified_o__Methanomassiliicoccales	0.853564	0.00341822
Available K	g__unclassified_p__Candidatus_Aenigmarchaeota	0.845196	0.0041166
Available K	g__unclassified_o__Thermoplasmatales	0.979088	4.27e-06
Available K	g__unclassified_f__Nitrosopumilaceae	0.845196	0.0041166
Available K	g__unclassified_o__Candidatus_Altiarchaeales	0.887037	0.00142602
Available K	g__Nitrosarchaeum	0.878669	0.0018158
Available K	g__Candidatus_Nitrosocaldus	0.811723	0.0078893
Available K	g__unclassified_c__Thermoprotei	0.853564	0.00341822
Available K	g__Methanofervidicoccus	0.769881	0.0152402
Available K	g__unclassified_p__Candidatus_Heimdallarchaeota	0.928878	0.000294526
Available K	g__Methanolobus	0.702935	0.0346701
Available K	g__Haloferax	0.836827	0.00490701
Available K	g__unclassified_f__Candidatus_Methanoperedenaceae	0.786618	0.0119092
Available K	g__Candidatus_Methanofastidiosum	0.870301	0.00227378
Available K	g__unclassified_c__Candidatus_Methanofastidiosa	0.845196	0.0041166
Available K	g__unclassified_o__Archaeoglobales	0.811723	0.0078893
Available K	g__Methanocalculus	0.820091	0.00678753
Available K	g__Haladaptatus	0.702935	0.0346701
Available K	g__Halegenticoccus	0.912142	0.000606851
Available K	g__Candidatus_Syntrophoarchaeum	0.744776	0.0213197
Available K	g__unclassified_f__Candidatus_Methanollivieraceae	0.702935	0.0346701
OM	g__unclassified_p__Thaumarchaeota	0.866667	0.0024954
OM	g__Nitrososphaera	0.85	0.00370478
OM	g__unclassified_p__Candidatus_Bathyarchaeota	0.866667	0.0024954
OM	g__Candidatus_Nitrosocosmicus	0.833333	0.00526569
OM	g__Methanosarcina	0.7	0.0357696
OM	g__unclassified_p__Euryarchaeota	0.883333	0.0015905
OM	g__unclassified_p__Crenarchaeota	0.883333	0.0015905
OM	g__unclassified_o__Nitrososphaerales	0.883333	0.0015905
OM	g__Methanoculleus	0.8	0.00962793
OM	g__Candidatus_Methanoperedens	0.883333	0.0015905
OM	g__Candidatus_Nitrosotalea	0.733333	0.0245542
OM	g__unclassified_c__Thermoplasmata	0.7	0.0357696
OM	g__Methanomassiliicoccus	0.916667	0.000506619
OM	g__Candidatus_Nitrosotenuis	0.766667	0.015944
OM	g__unclassified_o__Methanophagales	0.783333	0.0125199
OM	g__unclassified_o__Methanomassiliicoccales	0.916667	0.000506619
OM	g__unclassified_p__Candidatus_Aenigmarchaeota	0.75	0.0199421
OM	g__unclassified_o__Thermoplasmatales	0.866667	0.0024954
OM	g__unclassified_f__Nitrosopumilaceae	0.766667	0.015944
OM	g__unclassified_o__Candidatus_Altiarchaeales	0.733333	0.0245542
OM	g__Nitrosarchaeum	0.883333	0.0015905
OM	g__Candidatus_Nitrosocaldus	0.833333	0.00526569
OM	g__unclassified_c__Thermoprotei	0.766667	0.015944
OM	g__unclassified_p__Candidatus_Heimdallarchaeota	0.866667	0.0024954
OM	g__Haloferax	0.7	0.0357696
OM	g__unclassified_f__Candidatus_Methanoperedenaceae	0.716667	0.029818
OM	g__Candidatus_Methanofastidiosum	0.8	0.00962793
OM	g__unclassified_c__Candidatus_Methanofastidiosa	0.816667	0.00722479
OM	g__Methanobrevibacter	0.783333	0.0125199
OM	g__unclassified_o__Archaeoglobales	0.85	0.00370478
OM	g__Haloplanus	0.7	0.0357696
OM	g__Halostella	0.866667	0.0024954
OM	g__Vulcanisaeta	0.816667	0.00722479
OM	g__Halegenticoccus	0.766667	0.015944
OM	g__unclassified_f__Candidatus_Methanollivieraceae	0.716667	0.029818
pH	g__unclassified_p__Candidatus_Bathyarchaeota	0.756329	0.0183536
pH	g__unclassified_p__Candidatus_Thorarchaeota	0.840366	0.00456119
pH	g__unclassified_o__Thermoplasmatales	0.731118	0.0252154
pH	g__unclassified_f__Nitrosopumilaceae	0.857173	0.00314393
pH	g__unclassified_p__Candidatus_Lokiarchaeota	0.714311	0.0306167
pH	g__Nitrosarchaeum	0.747926	0.0204819
pH	g__Methanobrevibacter	0.705907	0.0335793
pH	g__unclassified_c__Thermoprotei	0.722715	0.0278302
pH	g__unclassified_p__Candidatus_Heimdallarchaeota	0.705907	0.0335793
pH	g__unclassified_c__Hadesarchaea	0.705907	0.0335793
pH	g__unclassified_p__Euryarchaeota	0.840366	0.00456119
pH	g__unclassified_o__Candidatus_Altiarchaeales	0.857173	0.00314393
pH	g__Candidatus_Methanoperedens	0.705907	0.0335793
pH	g__Methanocalculus	0.722715	0.0278302
pH	g__Candidatus_Nitrosotenuis	0.773137	0.0145489
pH	g__unclassified_o__Methanophagales	0.773137	0.0145489
NH4+-N	g__Methanobacterium	-0.73333	0.0245542
NH4+-N	g__Methanofollis	-0.71667	0.029818
NH4+-N	g__Methanospirillum	-0.76667	0.015944
NH4+-N	g__Methanothrix	-0.83333	0.00526569
NH4+-N	g__Methanocella	-0.83333	0.00526569
NH4+-N	g__unclassified_d__Archaea	-0.75	0.0199421
NH4+-N	g__unclassified_f__Methanotrichaceae	-0.86667	0.0024954
NH4+-N	g__unclassified_f__Natrialbaceae	-0.73333	0.0245542
NH4+-N	g__Halococcus	-0.71667	0.029818
NH4+-N	g__Methanoregula	-0.71667	0.029818
NO3--N	g__unclassified_o__Methanosarcinales	-0.7	0.0357696
NO3--N	g__unclassified_p__Candidatus_Thorarchaeota	-0.75	0.0199421
NO3--N	g__Nitrosopumilus	-0.83333	0.00526569
NO3--N	g__unclassified_f__Nitrosopumilaceae	-0.73333	0.0245542
NO3--N	g__unclassified_o__Candidatus_Altiarchaeales	-0.71667	0.029818
NO3--N	g__unclassified_c__Theionarchaea	-0.7	0.0357696
NO3--N	g__unclassified_c__Thermoprotei	-0.75	0.0199421
NO3--N	g__unclassified_f__Candidatus_Methanoperedenaceae	-0.8	0.00962793
NO3--N	g__Thermofilum	-0.88333	0.0015905
Available P	g__unclassified_p__Candidatus_Woesearchaeota	-0.82009	0.00678753
Available P	g__Candidatus_Argoarchaeum	0.753145	0.019142
Available P	g__Methanohalophilus	-0.72804	0.0261536
Available P	g__unclassified_p__Candidatus_Diapherotrites	-0.86193	0.00280593
Available P	g__Halococcus	0.794986	0.0104445
