# Supplementary material for: The Inhibiting Effects of High-Dose Biochar Application on Soil Microbial Metagenomics and Rice (Oryza sativa L.) Production
Source: Int J Mol Sci. 2023 Oct 10;24(20):15043. doi: 10.3390/ijms242015043 (PMC10606461; doi:10.3390/ijms242015043)
Supplement: Supplementary file 1 [file ijms-24-15043-s001.zip › Supplementary Table S5.xlsx]

## Sheet: Sheet1
Supplementary Table S6 Mantel test values of soil properties and microbial communities at the phylum level
Soil properties	Bacterial genus		Archaeal genus
	Mantel’s r	p_value	Mantel’s r	p_value
pH	0.496	0.002**	0.077	0.306
NO3−−N	0.694	0.001***	0.542	0.004**
NH4+−N	0.72	0.002**	0.388	0.047*
AP	0.579	0.016*	0.312	0.052
AK	0.486	0.003**	-0.009	0.47
OM	0.777	0.002**	0.509	0.014*
