# Supplementary material for: The Inhibiting Effects of High-Dose Biochar Application on Soil Microbial Metagenomics and Rice (Oryza sativa L.) Production
Source: Int J Mol Sci. 2023 Oct 10;24(20):15043. doi: 10.3390/ijms242015043 (PMC10606461; doi:10.3390/ijms242015043)
Supplement: Supplementary file 1 [file ijms-24-15043-s001.zip › Supplementary Table S6.xlsx]

## Sheet: Sheet1
	Supplementary Table S6. Line regressions between grain yield structure and the selected genera.
Kindom	Phylum	Genus	LEfSE	Grain yield structure
				Spike (pot−1)	Grain (spike−1)	Thousand Grain Weight (g)	Percentage of setting (%)
Bactiria	p_Proteobacteria	g_unclassified_c_Betaproteobacteria	CK	/		/	/
		g_unclassified_c_Deltaproteobacteria	PBC		/
		g_Anaeromyxobacter	PBC		/
	p_Actinobacteria	g_Nocardioides	CK		/
		g_Phycicoccus	CK	/	/
		g_Marmoricola	CK		/
	p_Candidatus_Rokubacteria	g_unclassified_p_Candidatus_Rokubacteria	CK		/
Archaea	p_Euryarchaeota	g_Methanothrix	CK	/	/	/
